1 Massively parallel reporter assays combined with cell-type specific eQTL informed multiple  
2 melanoma loci and identified a pleiotropic function of HIV-1 restriction gene, *MX2*, in melanoma  
3 promotion

4 Jiyeon Choi<sup>1#</sup>, Tongwu Zhang<sup>1#</sup>, Andrew Vu<sup>1</sup>, Julien Ablain<sup>2</sup>, Matthew M Makowski<sup>3</sup>, Leandro M  
5 Colli<sup>1</sup>, Mai Xu<sup>1</sup>, Harriet Rothschild<sup>2</sup>, Cathrin Gräwe<sup>3</sup>, Michael A Kovacs<sup>1</sup>, Myriam  
6 Brossard<sup>4</sup>, John Taylor<sup>5</sup>, Bogdan Pasaniuc<sup>6</sup>, Raj Chari<sup>7</sup>, Stephen J Chanock<sup>1</sup>, Clive J  
7 Hoggart<sup>8</sup>, Florence Demenais<sup>4</sup>, Jennifer H Barrett<sup>5</sup>, Matthew H Law<sup>9</sup>, Mark M Iles<sup>5</sup>, Kai  
8 Yu<sup>1</sup>, Michiel Vermeulen<sup>3</sup>, Leonard I Zon<sup>2</sup>, Kevin M Brown<sup>1\*</sup>

9 <sup>1</sup>Division of Cancer Epidemiology and Genetics, National Cancer Institute, Bethesda, MD,  
10 20892, USA, <sup>2</sup>Stem Cell Program and Division of Hematology/Oncology, Boston Children's  
11 Hospital and Dana-Farber Cancer Institute, Boston, MA, 02115, USA, <sup>3</sup>Department of Molecular  
12 Biology, OncoCode Institute, Radboud University, Nijmegen, Netherlands, <sup>4</sup>Genetic Variation and  
13 Human Diseases Unit, Institut National de la Santé et de la Recherche Médicale (INSERM),  
14 Université Paris Diderot, Paris, France, <sup>5</sup>Leeds Institute for Data Analytics, School of Medicine,  
15 University of Leeds, Leeds, UK, <sup>6</sup>Department of Human Genetics, David Geffen School of  
16 Medicine, University of California, Los Angeles, Los Angeles, CA, 90024, USA, <sup>7</sup>Genome  
17 Modification Core, Frederick National Lab for Cancer Research, National Cancer Institute,  
18 Frederick, MD, 21701, USA, <sup>8</sup>Department of Medicine, Imperial College London, London,  
19 UK, <sup>9</sup>Statistical Genetics, QIMR Berghofer Medical Research Institute, Brisbane, Queensland,  
20 Australia, #These authors contributed equally to this work, \*Correspondence should be  
21 addressed to K.M.B at: Email: [kevin.brown3@nih.gov](mailto:kevin.brown3@nih.gov)

## 22 **Abstract**

23 Genome-wide association studies (GWAS) have identified ~20 melanoma susceptibility loci. To  
24 identify susceptibility genes and variants simultaneously from multiple GWAS loci, we integrated

25 massively-parallel reporter assays (MPRA) with cell type-specific epigenomic data as well as  
26 melanocyte-specific expression quantitative trait loci (eQTL) profiling. Starting from 16  
27 melanoma loci, we selected 832 variants overlapping active regions of chromatin in cells of  
28 melanocytic lineage and identified 39 candidate functional variants displaying allelic  
29 transcriptional activity by MPRA. For four of these loci, we further identified four colocalizing  
30 melanocyte *cis*-eQTL genes (*CTSS*, *CASP8*, *MX2*, and *MAFF*) matching the allelic activity of  
31 MPRA functional variants. Among these, we further characterized the locus encompassing the  
32 HIV-1 restriction gene, *MX2*, on chromosome band Chr21q22.3 and validated a functional  
33 variant, rs398206, among multiple high LD variants. rs398206 mediates allelic transcriptional  
34 activity via binding of the transcription factor, YY1. This allelic transcriptional regulation is  
35 consistent with a significant *cis*-eQTL of *MX2* in primary human melanocytes, where the  
36 melanoma risk-associated A allele of rs398206 is correlated with higher *MX2* levels.  
37 Melanocyte-specific transgenic expression of human *MX2* in a zebrafish model demonstrated  
38 accelerated melanoma formation in a *BRAF*<sup>V600E</sup> background. Thus, using an efficient scalable  
39 approach to streamline GWAS follow-up functional studies, we identified multiple candidate  
40 melanoma susceptibility genes and variants, and uncovered a pleiotropic function of *MX2* in  
41 melanoma susceptibility.

## 42 **Introduction**

43 A series of genome-wide association studies (GWAS) over the past decade have  
44 identified about twenty genomic loci associated with cutaneous melanoma<sup>1-10</sup>, highlighting the  
45 genetic contribution to melanoma susceptibility in the general population. Some of these loci  
46 represent genes or regions implicated in melanoma-associated traits e.g., pigmentation  
47 phenotypes<sup>11-15</sup> and nevus count<sup>5,16,17</sup>. Other than these loci, however, underlying mechanisms  
48 of genetic susceptibility to melanoma in the general population is less well understood. For a  
49 small number of these loci, extensive characterization of susceptibility genes and variants under

50 the GWAS peaks have led to new insights into molecular pathways underlying melanoma  
51 susceptibility. *PARP1*, located in the Chr1q42.1 melanoma locus<sup>8</sup>, was shown to be a  
52 susceptibility gene that has tumor-promoting roles in early events of melanomagenesis through  
53 its regulation of melanocyte master transcription factor and oncogene, *MITF*<sup>18</sup>, while a functional  
54 variant at a multi-cancer locus on Chr5p15.33 was characterized highlighting the role of *TERT* in  
55 cancer susceptibility including in melanoma<sup>19</sup>. Still, the molecular mechanisms underlying the  
56 majority of common melanoma risk loci remain unexplained.

57         Recent advances in sequencing technologies have enabled a number of classical  
58 molecular assays to be conducted at a large scale. Massively Parallel Reporter Assays (MPRA)  
59 scale up conventional luciferase reporter assays for testing transcriptional activities of DNA  
60 elements, facilitating evaluation of tens of thousands of different short sequences at the same  
61 time in cells, which are then deconvoluted by massively parallel sequencing<sup>20-22</sup>. Incorporation of  
62 this approach is particularly attractive for GWAS functional follow-up studies, as 1) linkage  
63 disequilibrium (LD) limits statistical fine-mapping and leaves numerous variants as potential  
64 functional candidates, and 2) many trait-associated variants are hypothesized to contribute to  
65 allelic gene expression through *cis*-regulatory mechanisms that can be tested by reporter  
66 assays. Therefore, direct assessment of allelic differences in transcriptional regulation could  
67 help prioritize likely functional variants among multiple variants tied by LD. For example, a  
68 recent study adopted MPRA to test 2,756 variants from 75 GWAS loci for red blood cell traits  
69 and identified 32 functional variants from 23 loci<sup>20</sup>.

70         In addition, expression quantitative trait loci (eQTL) analysis can be a powerful approach  
71 for identifying susceptibility genes from GWAS loci, as it informs on genes for which expression  
72 levels are correlated with trait-associated variants. While there are a number of publicly  
73 available eQTL datasets using tissues representing different human organs including those  
74 through the GTEx project<sup>23</sup>, most of them are based on bulk tissue samples (e.g., skin tissues)

75 as opposed to individual cell types. Importantly, melanomas arise from melanocytes, but they  
76 account for less than 5% of a typical skin biopsy. To dissect cell-type specific gene expression  
77 regulation implicated in melanoma predisposition, a melanocyte eQTL dataset using primary  
78 cultures of melanocytes from 106 individuals was established and mapped six melanoma  
79 GWAS loci (30% of all the loci) to melanocyte eQTLs<sup>24</sup>. This dataset outperformed eQTLs from  
80 bulk skin tissues, other tissue types from GTEx, and melanoma tumors<sup>24</sup>, highlighting the utility  
81 of cell-type specific eQTL dataset for functional follow-up of GWAS regions.

82 In this study, we combine MPRA and cell-type specific melanocyte eQTL to scale up the  
83 functional annotation process for melanoma GWAS loci and nominate the best candidates for  
84 testing in a zebrafish model. Our approach identified a functional risk variant that increases the  
85 level of an HIV-1 restriction gene, *MX2*, in cells of melanocytic lineage; subsequent expression  
86 of *MX2* in melanocytes of a zebrafish melanoma model accelerated melanoma formation.

## 87 **Results**

### 88 **Massively parallel reporter assays identified melanoma-associated putative functional** 89 **variants**

90 To identify functional melanoma-associated variants displaying allelic transcriptional  
91 function, we used the MPRA approach. Among 20 genome-wide significant melanoma loci from  
92 the most recent GWAS meta-analysis<sup>1</sup>, we prioritized 16 loci where a potential *cis*-regulatory  
93 mechanism could be hypothesized, excluding four pigmentation-associated loci previously  
94 explained by functional protein coding variants (*MC1R*, *SLC45A2*, and *TYR*<sup>11-14</sup>) or shown not to  
95 be expressed in melanocytes (*ASIP*<sup>15</sup>). To comprehensively analyze genetic signals from these  
96 loci, we then performed statistical fine-mapping using the HyperLasso<sup>25</sup> approach. The fine-  
97 mapping nominated additional independent signals (**Supplementary Table 1**), from which we  
98 selected 30 variants, adding to the 16 lead SNPs from the initial meta-analysis results<sup>1</sup>. To



99 prioritize melanoma-associated variants to test by MPRA, we first selected 2,748 variants that  
100 are in LD ( $r^2 > 0.4$ ) with these 46 primary and secondary lead SNPs (**Methods; Supplementary**  
101 **Fig 1; Supplementary Table 2**). Among them, we further prioritized 832 variants that overlap  
102 potentially functional melanoma-relevant genomic signatures, namely, open chromatin regions  
103 and promoter/enhancer histone marks in primary melanocytes and/or melanoma short term  
104 cultures<sup>26</sup> (**Supplementary Table 3-4; Methods**; [www.encodeproject.org](http://www.encodeproject.org);  
105 [www.roadmapepigenomics.org](http://www.roadmapepigenomics.org)). We then constructed MPRA libraries for these 832 variants  
106 using methods adopted from previous studies<sup>20-22,27</sup>. A 145 bp genomic sequence  
107 encompassing the risk or protective allele of each variant was tested for their potential as an  
108 enhancer or promoter element in luciferase constructs. For each variant, a scrambled sequence  
109 for its core 21 bases was also tested as a null (**Supplementary Fig 2; Methods**). Transcribed  
110 output of tag (barcode) sequences associated with each tested DNA element were then  
111 measured by sequencing, after transfections into a melanoma cell line (UACC903) to represent  
112 melanoma-specific *trans*-acting factors and the HEK293FT cell line to obtain maximum  
113 transfection efficiency. From these data, we initially observed significantly high correlation of  
114 transcriptional activities among replicates, and further applied a conservative quality control  
115 measure for downstream analyses (**Methods; Supplementary Figs 3-7; Supplementary**  
116 **Table 5**).

117 To nominate variants displaying allelic transcriptional activity, we focused on those  
118 displaying significant difference between two alleles (FDR < 0.01), and then further selected  
119 those with either allele displaying a significant departure from the null (scrambled core  
120 sequence; FDR < 0.01) (**Supplementary Fig 3**). After applying these cutoffs, 39 of the 832  
121 tested variants (~4.7%) qualified as displaying allelic transcriptional activity in the UACC903  
122 melanoma cell dataset alone as well as in the combined total dataset (**Methods**;  
123 **Supplementary Fig 8A; Supplementary Table 6**). These candidate functional variants are

124 from 14 melanoma GWAS loci with 1-9 variants per locus (median 1.5 variants), which  
125 represents 2-33% of tested variants per locus (**Fig 1; Supplementary Table 7; Supplementary**  
126 **Fig 9**). Transcriptional activities of these 39 variants were significantly higher than those of  
127 negative controls (8 variants of high LD with the lead SNP but located in non-DHS/non-  
128 promoter/enhancer histone mark in melanocytes/melanoma cells;  $P < 2.2e-16$ , effect size =  
129 0.137; Mann-Whitney U test; **Supplementary Fig 8B**) as well as the rest of the variants (non-  
130 significant variants;  $P < 2.2e-16$ , effect size = 0.109). These 39 variants displayed 1.13 to 3.49-  
131 fold difference in transcriptional activity between two alleles (UACC903 cells; **Supplementary**  
132 **Table 6**). We then asked if the observed allelic differences from MPRA are in part due to  
133 differential binding of transcription factors. For this, we predicted allelic transcription factor  
134 binding affinity of each tested variant using motifbreakR<sup>28</sup>. When the allelic differences were  
135 compared, the MPRA-significant variants displayed a higher level of correlation between MPRA  
136 allelic activities and predicted allelic motif scores (Pearson  $r = 0.24$ ,  $P = 0.149$ ,  $n = 39$ ;  
137 **Supplementary Fig 10A**) compared to non-significant ones (Pearson  $r = -0.023$ ,  $P = 0.556$ ,  $n =$   
138 793). We then performed additional statistical fine-mapping of melanoma GWAS data to obtain  
139 probability scores for melanoma-associated variants using PAINTOR<sup>29</sup>, which integrates  
140 association strength with genomic functional annotation. To incorporate melanoma-relevant  
141 annotations to this fine-mapping, we included select functional annotations of primary  
142 melanocytes (melanocyte-specific expressed genes from our melanocyte dataset, melanocyte  
143 enhancers, TF-binding sites, and histone marks from ENCODE and Roadmap database). When  
144 overlaid with these probability scores, the 39 significant MPRA variants ( $FDR < 0.01$ ) displayed  
145 the highest median probability score compared to other variant groups with varying FDR cutoffs,  
146 which was a 2.12-fold enrichment over all the tested variants with probability scores  
147 (**Supplementary Fig 10B**). These data demonstrated that MPRA can quickly narrow down to a  
148 small number of plausible functional candidate variants from melanoma GWAS loci using allelic  
149 transcriptional activity.

150 **Integration of MPRA and melanocyte eQTLs identified functional variants and genes from**  
151 **multiple melanoma loci**

152 To prioritize functional variants that contribute to melanoma risk through regulation of  
153 nearby gene expression, we turned to cell-type specific melanocyte eQTL data from 106  
154 individuals<sup>24</sup>. 597,335 significant *cis*-eQTL SNPs (+/-1 Mb of TSS, FDR < 0.05, not LD-pruned)  
155 were identified in this dataset, with 6 of 20 melanoma GWAS loci displaying significant co-  
156 localization/TWAS<sup>24</sup>. As five of these six loci (1q21.3, 1q42.12, 2p22.2, 21q22.3, and 22q13.1)  
157 were tested in our MPRA, we overlaid MPRA-significant variants from these loci with genome-  
158 wide significant melanocyte eQTLs. Four loci had variants that were significant in both assays,  
159 and nine of these variants displayed a consistent direction, in which the direction of allelic  
160 expression of local genes matches those of MPRA allelic transcriptional activity  
161 (**Supplementary Table 7; Supplementary Fig 10C**). Namely, two MPRA-significant variants  
162 (rs2864871 and rs6700022) from the locus on chromosome band 1q21.3 were significant  
163 eQTLs for *CTSS* in melanocytes, where lower *CTSS* levels were correlated with melanoma risk.  
164 Similarly, two to three variants each (rs2349075, rs529458487, rs398206, rs408825, rs4383,  
165 rs4384, and rs6001033) from three other loci (2p22.2, 21q22.3, and 22q13.1) also overlapped  
166 with melanocyte eQTLs, where lower *CASP8*, higher *MX2*, and higher *MAFF* levels were  
167 correlated with melanoma risk, respectively (**Supplementary Table 8**). Thus, by combining  
168 MPRA and cell-type specific melanocyte eQTL, we identified candidate functional variants and  
169 susceptibility genes from multiple melanoma GWAS loci.

170 For the 21q22.3 locus, twenty-two variants were originally tested in MPRA, and three of  
171 these variants were significant MPRA variants (**Fig 2A; Supplementary Table 9**). Of these,  
172 rs398206 in the first intron of *MX2* gene (**Fig 2A**, shown in magenta) displayed a strong  
173 transcriptional activator function (1.7 to 4.3-fold above the scrambled sequence) as well as the  
174 most significant allelic difference in the MPRA experiment (the lowest P-value of all 832

175 variants), where the melanoma risk-associated A allele drove significantly higher luciferase  
176 expression than protective C allele (3.1-fold in UACC903 cells, FDR = 5.6e-206; **Fig 2B**).  
177 Subsequent individual luciferase assays using the same 145bp sequence in two melanoma cell  
178 lines validated this finding (2.7 to 5.0-fold allelic difference,  $P = 1.1e-6 - 5.2e-11$ ; **Fig 2C**;  
179 **Supplementary Fig 10D**). rs398206 was also a significant eQTL for levels of *MX2* gene in  
180 primary melanocytes, where the melanoma risk-associated A allele is correlated with higher  
181 *MX2* expression (Slope = 0.70,  $P = 6.6e-15$ ; **Fig 2D**). These data demonstrated that integration  
182 of MPRA with cell-type specific eQTL efficiently identified functional variants from the 21q22.3  
183 melanoma locus, as well as three additional loci (1q21.3, 2q33-q34, 22q13.1), by uncoupling  
184 multiple high-LD variants based on molecular phenotypes. This is a considerable advantage of  
185 our integrative approach complementing statistical fine-mapping, where perfect LD variants are  
186 impossible to distinguish. Based on the strong evidence for rs398206 on the locus on  
187 chromosome band 21q22.3, we focused our efforts of further molecular characterization on this  
188 locus.

### 189 **Multi-QTL analyses identified *MX2* as a melanoma susceptibility gene in the locus on** 190 **chromosome band 21q22.3**

191 While melanocyte eQTL consistently identified *MX2* as the best candidate susceptibility  
192 gene at the 21q22.3 melanoma locus<sup>24</sup>, we further interrogated eQTL data from melanocytes  
193 and 44 GTEx tissue types, to comprehensively assess potential melanoma susceptibility  
194 gene(s) in this locus. When we inspected eQTL data from 44 GTEx tissue types, rs398206 was  
195 a significant eQTL for *MX2* in five other tissue types (testis, transformed skin fibroblasts, ovary,  
196 tibial nerve, and whole blood) but no other gene displayed a genome-wide significant eQTL with  
197 rs398206 (GTEx portal; <https://gtexportal.org>).

198 As the melanocyte *cis*-eQTL analyses used for the above assessments were limited to  
199 the genes in +/-1Mb of the tested variants<sup>24</sup>, we explored if rs398206 is a marginal eQTL for any  
200 gene in the topologically-associated domain (TAD) to account for potential gene regulation  
201 mediated by chromatin looping typically occurring within this physical domain. From the  
202 genomic interval defined as the TAD encompassing rs398206 (chr21:42,480,000-44,320,000;  
203 hg19; retrieved from Hi-C data of SKMEL5 melanoma cell line generated for ENCODE dataset  
204 via <http://promoter.bx.psu.edu/hi-c/>), a total of 21 genes were significantly expressed in  
205 melanocytes, for which eQTL analyses were performed. The results demonstrated that *MX2*  
206 displayed the most significant eQTL with rs398206 ( $P = 6.6e-15$ ), while none of the other genes  
207 in the TAD displayed even a marginally significant eQTL after adjusting for multiple testing  
208 (Bonferroni-corrected cutoff at  $P < 0.0024$  for 21 genes; **Supplementary Table 10**). These data  
209 determined that *MX2* is the most likely susceptibility gene at the 21q22.3 melanoma  
210 susceptibility locus.

211 To complement the eQTL data, we also assessed allele-specific expression (ASE) of  
212 *MX2* in melanocytes. rs398206 is located in the 5' UTR region of an alternative *MX2* transcript  
213 isoform (ENST00000543692; **Supplementary Fig 11A**), the expression levels of which are  
214 correlated with the most abundant full-length transcript in melanocytes (ENST00000330714;  
215 Pearson  $r = 0.69$ ,  $P = 1.63e-16$ ; **Supplementary Fig 12**). RNA sequencing data from our  
216 previous study did not find genome-wide significant ASE for any melanoma-associated SNP  
217 (GWAS  $P < 5e-8$ ) residing in the transcribed region of *MX2*<sup>24</sup>, partly due to low sequence  
218 coverage of this transcript that is expressed at a low level. To thoroughly examine allele-specific  
219 expression in this region, we genotyped rs398206 in melanocyte cDNA using a Taqman  
220 genotyping assay that recognizes both genomic DNA and cDNA. The results demonstrated an  
221 over-representation of A allele-bearing transcripts in 27 heterozygous individuals, when the  
222 allelic ratio in cDNA was normalized to those in genomic DNA (One-sample Wilcoxon test,  $P =$

223 2.49e-5; **Supplementary Fig 13**). These data are consistent with the eQTL data, where the  
224 risk-associated A allele is correlated with higher *MX2* expression.

225 To thoroughly investigate possible mechanisms of allelic *MX2* expression in relation to  
226 rs398206, we performed a series of additional QTL analyses in melanocytes addressing  
227 alternative modes of gene regulation - splice-QTL (sQTL), DNA methylation QTL (meQTL),  
228 microRNA QTL (miQTL), and RNA stability QTL (QTL analysis of estimated mRNA half-life by  
229 measuring the differences between exonic and intronic read changes from RNAseq data<sup>30</sup>).  
230 Among them, sQTL analyses using LeafCutter<sup>31</sup> suggested that the main effect of the *MX2*  
231 eQTL was not driven by alternative isoforms or splicing events (**Supplementary Fig 11B-F**;  
232 **Supplementary Material**). Subsequent miQTL and RNA stability QTL analyses did not identify  
233 any genome-wide significant QTL for rs398206 in melanocytes (data not shown). meQTL  
234 analysis, on the other hand, identified a significant meQTL for rs398026 at a CpG probe near  
235 the *MX2* canonical promoter, where the melanoma risk-associated A allele is correlated with  
236 lower CpG methylation, which is consistent with higher expression of the full-length isoform  
237 (**Supplementary Fig 14**). Two other CpG probes in the first intron of *MX2* (closer to rs398206)  
238 also displayed significant meQTLs for rs398206 in melanocytes, where higher CpG methylation  
239 is correlated with the risk A allele. These observations are consistent with the previous findings  
240 that DNA methylation in promoters is negatively correlated with gene expression, while that of  
241 transcribed regions is positively correlated with gene expression<sup>32-36</sup>. Taken together, eQTL,  
242 sQTL, and meQTL data are consistent with the hypothesis that *MX2* full-length transcript mainly  
243 accounts for the eQTL at rs398206 in melanocytes through a transcriptional mechanism.

#### 244 **rs398206 is a functional variant regulating *MX2* levels via allelic binding of YY1**

245 To identify protein factors mediating the allelic difference observed in MPRA, we  
246 performed comparative mass-spectrometry using a 21bp DNA probe encompassing rs398206

247 with A or C alleles and nuclear extract from the UACC903 melanoma cell line (**Fig 3A**). Among  
248 the proteins displaying allelic binding, the most prominent A-allele preferential binding was  
249 shown for Yinyang-1 (YY1), a ubiquitous transcription factor having roles in development and  
250 cancer<sup>37</sup> as well as in pigmentation pathways of melanocytes<sup>38</sup>. Sequence-based motif  
251 prediction was also consistent with this finding, indicating that the sequence around rs398206  
252 forms a consensus binding site for YY1 favoring the A-allele (**Fig 3B**). Subsequent  
253 electrophoretic mobility shift assays (EMSAs) validated that this A-allele-preferential binding of  
254 nuclear proteins is sequence-specific, as shown by competition with unlabeled probes (**Fig 3C**).  
255 Antibody super-shift demonstrated that YY1 is present in this subset of allelic-binding proteins  
256 (**Fig 3C**), which was further validated by EMSAs with purified recombinant YY1 protein (**Fig 3C-**  
257 **D**). We subsequently performed chromatin immunoprecipitation (ChIP) using anti-YY1 antibody  
258 and demonstrated enrichment of YY1 binding to the genomic DNA region encompassing  
259 rs398206 in two melanoma cell lines (**Fig 4A**). Of these two cell lines, UACC647 is  
260 heterozygous for rs398206, and thus we performed genotyping of rs398206 using the DNA  
261 fragments pulled down by anti-YY1 antibody. DNA fragments pulled down using YY1 antibody  
262 displayed a significant enrichment of A allele (Mann-Whitney U test,  $P = 9.1e-3$ ), while genomic  
263 DNA and serial-diluted input DNA displayed equivalent signal from both A and C alleles,  
264 indicating clear A-allele preferential binding of YY1 in melanoma cells (**Fig 4B-C**).

265         Based on this strong allelic YY1 binding, we next asked if YY1 regulates endogenous  
266 *MX2* expression levels. siRNA knockdown of YY1 in the UACC903 melanoma cell line  
267 demonstrated a weak but consistent reduction of *MX2* levels by four different sets of siRNAs  
268 (14-32% decrease,  $P = 1.5e-3 - 1.9e-5$ , one-sample Wilcoxon test; **Fig 5A; Supplementary Fig**  
269 **15D**) indicating a regulation of *MX2* levels by YY1. To further determine if the genomic region  
270 encompassing rs398206 regulates endogenous *MX2* levels, we targeted this region by CRISPRi  
271 using dCAS9-KRAB-MeCP2<sup>39</sup> in the same melanoma cell line. Four gRNAs targeting the



272 genomic regions either directly overlapping rs398206 (gRNA 1, 3, and 4) or ~25bp upstream  
273 (gRNA 2) resulted in 61-82% reduction in *MX2* expression levels ( $P = 2.05e-4 - 3.19e-4$ , one-  
274 sample Wilcoxon test; **Fig 5B**), while the same gRNAs do not have effect on nearby *MX1*  
275 expression (**Supplementary Fig 15A**). As rs398206 is located in the intronic region of *MX2*, it is  
276 formally possible that some of the effect on *MX2* expression could be due to physical blocking of  
277 passage of transcriptional machinery by dCAS9-KRAB-MeCP2 system. CRISPRi using dCAS9  
278 without the transcriptional repressor elements, however, displayed little or no effect on *MX2*  
279 expression, which is consistent with the CRISPRi effect on *MX2* being mainly transcriptional  
280 (**Supplementary Fig 15B, C, E**).

281 To identify additional support for rs398206 regulating *MX2* via YY1, we examined  
282 available chromatin interaction data involving YY1. Notably, YY1 was recently shown to mediate  
283 chromatin looping and contribute to interactions between gene promoters and enhancers within  
284 TADs<sup>40</sup>. Given this, we examined YY1-mediated chromatin interaction around the genomic  
285 region encompassing rs398206 in these published Hi-ChIP data using YY1 antibody. In the  
286 human colorectal carcinoma cell line, HCT116, the 5Kb bin harboring rs398206 displayed strong  
287 interactions with two adjacent bins encompassing *MX2* promoter area<sup>40</sup> ( $P = 2.27e-80$  and  
288  $8.44e-24$ ; **Supplementary Fig 16**), but not with other neighboring gene promoters (at PET  
289 count >2). Together these data determined that rs398206 is a functional variant regulating *MX2*  
290 expression via differential YY1 binding in the Chr21q22.3 melanoma locus.

## 291 **Melanocyte-specific *MX2* expression accelerates melanoma formation in zebrafish**

292 *MX2* is best known for its function in innate immunity as an HIV-1 restriction gene<sup>41,42</sup>. In  
293 GTEx tissue types, the highest *MX2* expression levels are observed in EBV-transformed  
294 lymphocytes, whole blood, and spleen, reflecting its main role in innate immune response as an  
295 interferon-stimulated gene (GTEx portal; <https://gtexportal.org>). On the other hand, a previous



296 study also demonstrated that *MX2* has cell-autonomous function in the proliferation of HeLa  
297 cells without IFN $\alpha$ -mediated induction<sup>43</sup>. In our primary melanocyte dataset, *MX2* is expressed  
298 at a relatively high level (median expression ranked at top 26.5% of all expressed genes)  
299 without IFN $\alpha$  stimulation. To assess co-expressed genes and enriched pathways in  
300 melanocytes expressing *MX2* at a higher level, we profiled differentially expressed genes  
301 between *MX2*-high (top 25%; n = 28) and *MX2*-low (bottom 25%; n = 28) melanocytes. From  
302 253 differentially expressed genes in *MX2*-high melanocytes (FDR < 0.01 and  $|\log_2$  fold  
303 difference| > 1; **Supplementary Table 11**), significantly enriched pathways included those  
304 relevant to cellular immune response as expected, but also included those affecting cellular  
305 growth and cancer (**Fig 6C**; **Supplementary Table 12**) suggesting a possible non-immune  
306 function of *MX2* in melanocytes. On the other hand, an examination of immune infiltrates in  
307 melanomas from TCGA did not provide sufficient evidence for the roles of *MX2* in immune  
308 surveillance at least at the time of surgical resections represented in these tumor samples  
309 (**Supplementary Material**; **Supplementary Fig 17**).

310         Given the possibility of a melanocyte-specific function of *MX2*, we hypothesized that  
311 melanocyte-specific *MX2* expression might have roles in early events of melanoma formation.  
312 To test this hypothesis, we first asked if *MX2* affects growth of primary melanocytes and  
313 melanoma cells in a single culture system. Cell growth assays using the xCELLigence system  
314 demonstrated that inducible lentiviral expression of *MX2* (2 – 10-fold induction; **Supplementary**  
315 **Fig 18**) resulted in slightly decreased growth of both melanoma cells and primary melanocytes  
316 at 100ng/ml of doxycycline treatment, while empty vector transduced cells did not show any  
317 difference (**Fig 6A-B**). To begin to understand what genes and pathways might be affected by  
318 increased *MX2* expression and could potentially underlie the altered melanoma  
319 cells/melanocytes growth, we performed RNA-seq analyses on melanocytes over-expressing  
320 *MX2* (2 – 10-fold induction; **Supplementary Fig 18**). Differentially expressed genes in *MX2*-

321 overexpressing melanocytes compared to controls (158 genes, FDR<10%; melanocytes from 3  
322 individuals, 3 biological replicates each) displayed enrichment of pathways relevant to immune  
323 response as well as those involving second messenger mediated kinase signaling and cellular  
324 growth, among others (**Supplementary Tables 13-14; Fig 6D**). Since these data did not  
325 provide an apparent mechanistic hypothesis linking the effect of increased *MX2* on reduced  
326 melanocyte growth in single cultures to its association with melanoma risk, we speculated that  
327 the effect of *MX2* on melanocyte growth might change depending on cellular context and  
328 microenvironment.

329 To test this idea and establish a melanocyte-specific role for *MX2* expression in the  
330 development or progression of melanoma, we examined transgenic expression of human *MX2*  
331 in a zebrafish melanoma model, in conjunction with the most recurrent somatic driver event of  
332 melanoma, *BRAF*<sup>V600E</sup>. Using the previously developed miniCoopR transgene system<sup>44</sup>, we  
333 over-expressed human *MX2* exclusively in the melanocytic-lineage using an *MITF* promoter in  
334 the background of *BRAF*<sup>V600E</sup> and p53<sup>-/-</sup>. The results demonstrated that zebrafish with transgenic  
335 human *MX2* expression presented an accelerated melanoma formation (46% of fish developed  
336 melanoma by 19 weeks; n = 184) compared to those with GFP controls (33% of fish by 19  
337 weeks; n = 194) in this genetic background (P = 0.003; log-rank test; **Fig 6E**). These data are  
338 consistent with *MX2* expression contributing to an increased melanoma risk in part by a  
339 melanocyte-specific mechanism.

## 340 **Discussion**

341 In this study, we adopted an integrative approach combining MPRA with cell-type  
342 specific epigenomic and eQTL data to efficiently nominate functional variants and susceptibility  
343 genes from 20 known melanoma GWAS loci. Molecular characterization of functional variants  
344 and susceptibility genes from a GWAS locus can represent a significant commitment of time

345 and effort as the functions of these genes and variants could be obscure unless the relevant cell  
346 types and molecular contexts are considered. By using cell-type specific eQTL to prioritize  
347 candidate variants from MPRA, we were able to maximize the probability of finding the most  
348 plausible candidates for intense characterization in a time-efficient way. In the future,  
349 incorporation of MPRA and cell-type specific eQTL with additional genome-scale datasets,  
350 including cell-type specific chromatin interaction data as well as chromatin features of different  
351 cellular contexts will further identify strong leads for additional loci with candidate melanoma  
352 susceptibility genes and variants.

353 Our integrative approach efficiently identified the most plausible susceptibility genes and  
354 functional variants from four melanoma GWAS loci. For the melanoma locus on chromosome  
355 band 22q13.1, increased *MAFF* levels were correlated with risk. *MAFF* is a small Maf protein  
356 regulated by EGF signaling<sup>45</sup> and plays a role in the oxidative stress response<sup>46</sup>, which is  
357 relevant to melanomagenesis, given the vulnerability of melanocytes to oxidative stress  
358 attributable to melanin production<sup>47</sup>. For the locus on chromosome band 1q21.3 and 2q33-q34,  
359 lower *CTSS* and *CASP8* levels were correlated with the risk, respectively. *CTSS* is a member of  
360 cathepsin proteases, initially known as lysosomal enzymes<sup>48</sup>. Increased expression of *CTSS* is  
361 correlated with poor prognosis in the context of some cancers (breast and colorectal cancer) but  
362 also correlated with better outcome in others (lung cancer). *CASP8* is mainly known for its  
363 function in apoptosis<sup>49</sup>, and GWAS also implicated the *CASP8* locus for breast cancer<sup>50</sup> and  
364 basal cell carcinoma<sup>51</sup>. Our results provide strong support for these three genes and warrant  
365 further in-depth characterization.

366 Through molecular interrogation, we demonstrated that a melanoma-associated intronic  
367 variant, rs398206, contributes to allelic expression of *MX2* via modifying an enhancer element  
368 recruiting the transcription factor, YY1. Our multi-QTL analyses of primary melanocytes further  
369 supported a transcriptional mechanism, while ruling out alternative mechanisms (splicing, RNA

370 stability, or microRNA-related). Thorough investigation of marginal eQTLs in the TAD further  
371 validated that *MX2* is the best target of this *cis*-regulation.

372 Our zebrafish model provided further support for *MX2* as a melanoma susceptibility gene  
373 accelerating melanoma formation when expressed in the cells of melanocytic-lineage. *MX2* has  
374 been mainly known as an effector of innate-immunity, conferring restriction to HIV-1  
375 infection<sup>41,42</sup>, and its roles in melanomagenesis have not been studied. Our findings suggest a  
376 cell-autonomous role of *MX2* in promoting melanoma formation when exclusively expressed in  
377 cells of melanocytic-lineage, in the presence of *BRAF*<sup>V600E</sup>, a frequent somatic driver mutation.  
378 Our single cell-type growth assays for *MX2* also support the zebrafish data by showing growth  
379 effects for *MX2* in melanocytic-lineage without the presence of neighboring cell types, albeit in  
380 the opposite direction. Further interrogation of how *MX2* promotes melanocyte growth will  
381 enhance our understanding of precise molecular pathways involved. Nevertheless, our findings  
382 established *MX2* as a new gene displaying pleiotropic roles in melanoma susceptibility and  
383 immune response, building on to the established roles of telomere biology (*TERT*,  
384 Chr5p15.33)<sup>19</sup> and oncogene-induced senescence (*PARP1*, Chr1q42.1)<sup>18</sup> in genetic  
385 susceptibility to melanoma in the general population.

## 386 **Methods**

### 387 **Melanoma GWAS fine-mapping**

388 Fine-mapping of the 20 genome-wide significant loci from the meta-analysis reported by Law  
389 and colleagues<sup>1</sup> was conducted following a very similar approach to that of Barrett, *et al*<sup>62</sup>. Using  
390 the results from Law, *et al*<sup>1</sup> a window was defined as 1Mb on either side of the most significant  
391 variant at each locus. The only exception to this was the region that included the *ASIP* gene  
392 (20q11.2-q12), where a 6Mb region was instead defined, as this region demonstrated a long-  
393 range linkage disequilibrium. Melanoma case/control status was regressed on each genotyped

394 and imputed variant in turn across these regions, with the first four principal components as  
395 covariates to account for stratification on 12,419 cases and 14,242 controls from the meta-  
396 analysis (only the Harvard GWAS samples and the endometriosis controls from the Q-  
397 MEGA\_610k study were unavailable). Each region was further narrowed down to the interval  
398 covering 500kb on either side of the most extreme SNPs with p-value  $< 10^{-6}$  in the initial single  
399 SNP analysis and any variants with an imputation INFO score  $< 0.5$  (for variants with MAF  $\geq$   
400 0.03) or INFO score  $< 0.8$  (for variants with MAF  $< 0.03$ ) was removed. A Bayesian-inspired  
401 penalized maximum likelihood approach implemented in HyperLasso<sup>25</sup> was applied to these  
402 regions. 100 iterations of HyperLasso were then conducted, using all variants in each region  
403 and a Normal Exponential Gamma prior distribution for SNP effects with a shape parameter  
404  $1.0^{53,54}$  and scale parameter such that type 1 error is  $10^{-4}$ . Both the study (as a categorical  
405 variable) and the first four components were included as covariates. Because of the stochastic  
406 nature of the order in which variables are tested for inclusion, this produced a number of  
407 potential models, including some that can be considered to 'correspond' to one another,  
408 because they differ only by substituting genetic variants that are in very strong LD ( $r^2 > 0.9$ ). By  
409 dropping equivalent models, a reduced set of models was produced and was then further  
410 reduced by dropping any model whose likelihood was inferior to that of the best model by a  
411 factor  $\geq 10$ . For each remaining model, a logistic regression was conducted using the SNPs in  
412 the model to generate adjusted odds ratios. For SNPs retained in any of the models, LD blocks  
413 were defined (based on both the HyperLasso results and strength of LD) and the most  
414 significant SNP (in a multivariable analysis) from each block was selected. rs36115365 in the  
415 region near *TERT* gene (5p15.33) was not identified in the fine-mapping but included for variant  
416 selection as it was identified previously based on functional evidence<sup>19</sup>. Subsequent analysis  
417 showed that the risk-associated alleles at rs36115365 and at rs2447853 (the most significant  
418 SNP in the region at the time) are in negative LD and when adjusted for the latter SNP,  
419 rs36115365 has a P-value of  $10^{-4}$  (**Supplementary Table 1**). Similarly, for the locus on

420 chromosome band 2p22.2, the optimal model was a 2-SNP, but the secondary signal at  
421 rs163094 displayed low INFO scores in some studies rendering imputation less optimal and  
422 hence was not used for variant selection. Instead, the best SNP identified by 1-SNP model  
423 (rs1056837; a missense variant of *CYP1B1*) was included as an alternative (**Supplementary**  
424 **Table 1**). Since the effect of the region around *MC1R* gene (16q24.3) on melanoma risk is  
425 mainly explained by several well-established coding variants<sup>12</sup>, we did not include this region in  
426 our fine-mapping data.

#### 427 **MPRA workflow**

428 Luciferase reporter libraries were constructed by taking 145bp genomic sequence  
429 encompassing the risk or protective allele of each variant (**Supplementary Fig 2**). We also  
430 included a scrambled sequence for each variant, where 21 bases encompassing the variant  
431 were scrambled to serve as a pseudo-baseline. Each 145bp sequence was tested in both  
432 forward and reverse directions and was assigned 10 different unique 10bp barcode sequences  
433 to minimize aberrant effects of a specific barcode sequence. Resulting sequences were tested  
434 in luciferase constructs harboring TATA minimal promoter (for potential enhancer function) or no  
435 promoter sequence (for potential promoter function). Libraries were then transfected into a  
436 melanoma cell line (UACC903) to represent melanoma-specific *trans*-acting factors and the  
437 HEK293FT cell line to obtain maximum transfection efficiency. Resulting transcribed output as  
438 well as DNA input were then quantified by sequencing. Transcriptional activity of each sequence  
439 was determined by measuring the ratio of transcribed Tag counts Per Million sequencing reads  
440 (TPM) compared to those of DNA input (**Supplementary Fig 3**). We observed high inter-  
441 transfection as well as inter-library correlations of these transcriptional activities given the same  
442 input sequences (log<sub>2</sub>-transformed TPM ratios between replicates; median inter-transfection  
443 Pearson  $r = 0.984$  for transfection replicates, and 0.854 for inter-library replicates;  
444 **Supplementary Figs 4-6; Supplementary Table 5**). After removal of tags that were poorly

445 represented at the DNA level (TPM < 6), 77.47% of the tags from the input sequences were  
446 retained for the further analyses (**Supplementary Fig 7**).

#### 447 **MPRA variant selection**

448 Among 20 genome-wide significant loci from the melanoma meta-analyses by Law and  
449 colleagues<sup>1</sup>, we prioritized 16 loci where potential *cis*-regulatory mechanism could be applied.  
450 We excluded the other 4 loci containing genes that are implicated in melanoma-associated  
451 pigmentation phenotypes (*SLC45A2*, *TYR*, *MC1R*, and *ASIP* loci), as for many of these genes,  
452 coding variants were shown to alter the protein functions. To select high-LD proxy variants for  
453 16 melanoma GWAS loci (Law, *et al.*, 2015<sup>1</sup>), we used the following criteria:

- 454 1. Primary lead SNPs were taken from Law, *et al.*<sup>1</sup> meta-analysis paper and supplemented  
455 by those from additional HyperLasso analysis when there are alternative best SNPs  
456 available.
- 457 2. For 8 loci, HyperLasso analysis nominated independent multiple secondary signals and  
458 these lead SNPs were also added.
- 459 3. SNPs of  $r^2 > 0.4$  with the primary or secondary lead SNPs using 1000 Genomes phase3  
460 EUR or CEU populations were selected as “high-LD variants” (n = 2,748)

461 To prioritize high-LD variants overlapping melanocyte/melanoma open chromatin regions and/or  
462 active promoter/enhancer histone marks, we used one or more of the following criteria:

- 463 1. Variant is located within a human melanocyte DHS peak from one or more individuals of  
464 three available through ENCODE and Epigenome Roadmap database.
- 465 2. Variant is located within a human melanocyte H3K27Ac ChIP-Seq peak from one or  
466 more individuals **AND** a H3K4Me1 ChIP-Seq peak from one or more individuals of two  
467 and three available through Epigenome Roadmap database, respectively.



468 3. Variant is located within a human melanocyte H3K27Ac ChIP-Seq peak from one or  
469 more individuals **AND** a H3K4Me3 ChIP-Seq peak from one or more individuals of two  
470 and three available through Epigenome Roadmap database, respectively.

471 4. Variant is located within a human melanoma short-term culture FAIRE-Seq peak from  
472 one or more individuals of 11 available from Verfaillie et al<sup>26</sup>.

473 Based on the above criteria, **832** melanoma GWAS variants were selected to be tested by  
474 MPRA. We also included 8 additional variants from Chr1q21.3 that were of  $r^2 > 0.8$  with the lead  
475 SNP but did not overlap with any functional signature listed above and assigned them as  
476 negative controls. Of 832 variants, 306 as well as 8 negative controls were repeated in two  
477 libraries to ensure cross-library consistency (see **MPRA oligo library design**). These 306  
478 variants are also  $r^2 > 0.6$  with their lead SNPs and supported by both open chromatin and  
479 histone mark annotation from melanocyte or melanoma data. A complete list of variants tested  
480 are listed in **Supplementary Table 3**.

#### 481 **MPRA oligo library design**

482 Oligo libraries were designed mainly following the guidelines from published works<sup>21,27</sup> with  
483 some modifications. Two libraries containing 32,580 (library 1) and 36,660 (library 2) unique  
484 sequence of 200-mer oligos (total of 50,400 unique sequences across two libraries with 18,840  
485 repeated in both) were synthesized by Agilent Technologies (Santa Clara, CA). Composition of  
486 each library by GWAS locus and repeated variants are listed in **Supplementary Tables 3-4**. For  
487 each variant, 145 bases encompassing the variant with either risk or protective allele in both  
488 forward and reverse directions were synthesized together with 10 different 10 base random  
489 barcode sequences. These two parts of sequences were separated by recognition sequences  
490 for restriction enzymes KpnI (GGTACC) and XbaI (TCTAGA), and flanked by binding  
491 sequences for PCR primers (200 bases oligo sequences: 5'-ACTGGCCGCTTCACTG-145  
492 bases-GGTACCTCTAGA-10 bases tag-AGATCGGAAGAGCGTCG-3'). For each variant, a



493 scrambled sequence (core 21 bases encompassing the SNP with the reference allele were  
494 shuffled) was also tested in forward and reverse directions in the same manner. This is  
495 equivalent to a total of 60 unique sequences designed per variant. When there are additional  
496 SNPs other than the test SNP that fall in the 145bp region, major allele in EUR population was  
497 used. For indels, 145 bases length was set based on insertion allele and the deletion allele was  
498 left shorter than 145 bases. Random 10 base tag sequences were generated once so that each  
499 library has up to 36,660 unique tag sequences (the same 36,660 tag sequences were used for  
500 each library). For the 10 base tag sequence and scrambled 21 base core sequence, only  
501 homopolymers of <4 bases were used and the enzyme recognition sites for KpnI, XbaI, and SfiI  
502 were avoided. A complete list of oligo sequences can be found in **Supplementary File 1** as an  
503 R object.

#### 504 **MPRA library construction and sequencing**

505 MPRA library construction and sequencing was performed following published protocols with  
506 some modifications<sup>21,27</sup>.

#### 507 *Cloning of the libraries*

508 Ten femtomole each of gel-purified (10% TBE-Urea polyacrylamide gel) oligo libraries was  
509 amplified by emulsion PCR using Herculase II fusion polymerase and 2  $\mu$ M of primers providing  
510 SfiI enzyme sites (**Supplementary Table 15**), following the instructions of the Micellula DNA  
511 Emulsion & Purification Kit (EURx/CHIMERx). Amplified oligos were quantified using KAPA  
512 qPCR assay and verified by DNA sequencing on Ion PGM. Amplicon libraries were prepared  
513 using 30ng of oligos from emulsion PCR using Ion Plus Fragment Library Kit and were  
514 sequenced on Ion PGM for an average 203bp and 175bp read length at 6.7 million and 5.6  
515 million reads per sample for library 1 and library 2, respectively. To verify oligo library design,  
516 21bp sequences within oligos including variant site and +/- 10bp were used to map to each

517 sequencing read. Linux command “fgrep” was used and only 100% sequence match was kept.  
518 We then counted the total read depth for each variant represented by the matched sequences,  
519 and then calculated the proportion of variant sequences that were verified. For both library 1  
520 and library 2, more than 97% of unique sequences representing the variants in the library were  
521 detected with at least 10 sequencing reads. In addition, we found similar proportion and read  
522 depth for sequences representing both forward and reverse directions in both libraries. If we use  
523 the actual tag sequences as a bait, 82% of tags could be verified, with a caveat that some tags  
524 were amplified but not detected because of relatively poor sequencing quality in this position of  
525 the amplicon. Sequence-verified oligo libraries were first cloned into pMPRA1 vector (Addgene)  
526 using Sfil site by electroporation into 10 times higher number of bacterial cells than the number  
527 of unique sequences in the oligo library. Cloned pMPRA1 was further digested on KpnI and  
528 XbaI sites between 145bp test sequence and 10bp barcode sequence, where luc2 ORF with or  
529 without a minimal promoter was ligated from pMPRAdonor2 and pMPRAdonor1 (Addgene),  
530 respectively. The ligation product was transformed by electroporation into 10 times higher  
531 number of bacterial cells in the same manner. Cloned final library for transfection was verified  
532 on the gel as a single band after KpnI digestion.

### 533 *Transfections and sequencing library preparation*

534 Each library was transfected at least four times (two transfections for each promoter type) into  
535 HEK293FT or UACC903 melanoma cells aiming > 100 times higher number of transfected cells  
536 than the library complexity considering transfection efficiency estimated by a separate GFP  
537 transfection and visualization. A summary of transfections is listed in **Supplementary Table 5**.  
538 Cells were transfected using Lipofectamine 3000 and harvested at 24 hours after transfection  
539 for RNA isolation. Total RNA was isolated using Qiagen RNeasy kit, and mRNA was  
540 subsequently isolated using PolyA purist MAG kit. cDNA was then synthesized using  
541 Superscript III, from which only short sequences encompassing 10 bp unique barcodes were

542 amplified using Q5 high-fidelity polymerase and primers introducing Illumina TruSeq adapter  
543 sequences (**Supplementary Table 15**). Tag sequence libraries were also prepared using input  
544 DNA in the same way. Each tag sequence library was sequenced on a single lane of  
545 HiSeq2500 (125 bp paired end read).

## 546 **MPRA data analyses**

### 547 *Obtaining normalized tag counts*

548 Using FASTQ files from input DNA or RNA transcript sequencing, we counted the number of  
549 reads (Illumina read 1) completely matching 10bp barcode sequences (tag counts) and the  
550 same downstream sequence context (“TCTAGAATTATTACACGGCG”) including an XbaI  
551 recognition site and the 3’ of the *luc2* gene. For each transfection (equivalent to one sequencing  
552 run), Tag counts Per Million sequencing reads (TPM) values were calculated by dividing each  
553 tag count by the total number of sequence-matching tag counts divided by a million. TPM ratio  
554 was then taken as RNA TPM over input DNA TPM and  $\log_2$  converted.

### 555 *Quality control*

556 From each input DNA library at least 92.1% of barcode sequences were detected, and > 89.3%  
557 were covered at 10 reads or higher. From RNA samples 87.4 – 93.3% of barcode sequences  
558 were detected, and 84.8 – 90.8% were covered at 10 reads or higher (**Supplementary Table**  
559 **5**). Barcodes showing 10 tag counts or lower were excluded from the further analyses. Median  
560 tag counts for the barcodes that were included in the analyses were 48,973-49,903 for DNA  
561 input and 46,471-49,758 for RNA output. Reproducibility between transfections were assessed  
562 by Pearson correlation of  $\log_2$ -transformed TPM ratio of each barcode between replicates of  
563 transfection. We observed correlation coefficient of 0.944 or higher for each library transfected  
564 to HEK293FT cells and 0.935 or higher for UACC903 cells (**Supplementary Fig 4**). Correlation  
565 test was also performed between repeated sequences across libraries. We observed correlation

566 coefficient of 0.821 or higher for HEK293FT cells (**Supplementary Fig 5**) and 0.815 or higher  
567 for UACC903 cells (**Supplementary Fig 6**). To avoid low input DNA counts driving variations in  
568 RNA/DNA TPM ratios, we removed tags with < 6 TPM counts from further analyses. The  
569 remaining tags account for 77.47% of all the detected tags (**Supplementary Fig 7**).

#### 570 *Identification of functional GWAS variants*

571 We analyzed the normalized MPRA measurement ( $\log_2$  transformed TPM ratio) using a  
572 standard linear regression model. We used the Wald test to test the impact of “allele” on MPRA  
573 level, after adjusting the effect of “Strand” (forward or reverse direction) as a binary covariate,  
574 the effect of “Transfection” as a categorical covariate with 18 levels (accounting for different  
575 promoter status and cell types as well as cross-transfection variations). To account for the  
576 potential heteroskedasticity in the measurement error, we used the robust sandwich type  
577 variance estimate in the Wald test as recommended by Long and Ervin<sup>55</sup>, and used the R  
578 package “Sandwich” to conduct the analysis. To assess overall transcriptional activity of the  
579 145bp DNA element including the variant, we used variant-specific scrambled sequences as a  
580 null.  $\log_2$  transformed TPM ratios of scrambled sequences were regressed against those of  
581 either reference or alternative allele while using the same covariates (“Strand” and  
582 “Transfection”).  $\log_2$  TPM ratio for each tag in each transfection was considered as an  
583 experimental replicate for regression. The same set of analyses was done only using data from  
584 UACC903 melanoma cells and further dropping data for repeated variants from one of two  
585 libraries (library 1) to allow subsequent enrichment analyses. Variants showing FDR < 0.01 for  
586 both allelic difference and departure from null (for either allele) in both UACC903 only and  
587 combined set were called as significant MPRA variants. Complete processed MPRA data can  
588 be found in **Supplementary File 1** as an R object.

#### 589 **Motif analysis**

590 Prediction of variant effects on transcription factor binding sites was performed using the  
591 motifbreakR package<sup>28</sup> and a comprehensive collection of human transcription factor binding  
592 sites models (HOCOMOCO)<sup>56</sup>. We selected the information content algorithm and used a  
593 threshold of 0.001 as the maximum P-value for a transcription binding site match in  
594 motifbreakR. Log<sub>2</sub> fold change between alternative allele score and reference allele score were  
595 used to predict the transcription factor motif effect for each variant.

### 596 **Statistical fine-mapping using PAINTOR**

597 PAINTOR 3.0 (<http://bogdan.bioinformatics.ucla.edu/software/paintor>) was used to estimate the  
598 posterior probability of any SNP within a melanoma locus to be causal. We used default  
599 parameters in PAINTOR (window size of 100Kb, max causals 2) and filtered out all the SNPs  
600 with P-value > 0.5 for computational efficiency. The pairwise LD between all SNPs in each  
601 window was computed using the 1000 Genomes EUR data. Functional annotations were  
602 provided as part of PAINTOR software which was complimented with a melanocyte specific  
603 gene set annotation<sup>24</sup>. In order to determine which annotations are relevant to the phenotype  
604 being considered, we ran PAINTOR on each annotation independently and then selected 4  
605 annotations specific to primary melanocytes with high sum of log Bayes factors for the final  
606 model to compute trait-specific posterior probabilities for causality. These 4 annotations include  
607 melanocyte-specific expressed genes from our melanocyte dataset<sup>24</sup>, melanocyte enhancers,  
608 TF-binding sites, and histone marks from ENCODE and Roadmap. Aside from the variants not  
609 meeting our analysis parameters, 462 out of 832 MPRA-tested variants were assigned a  
610 posterior probability by PAINTOR and were used for enrichment analyses.

### 611 **Melanocyte eQTL, sQTL, meQTL, and RNA stability QTL**

612 Primary melanocyte eQTL data was obtained from our previous study<sup>24</sup>, where 106 individuals  
613 mainly of European decent were analyzed. For the marginal eQTL analysis of the genes located

614 in the TAD including rs398206, 21 genes were selected based on expression thresholds of  $>0.5$   
615 RSEM and  $\geq 6$  reads in at least 10 samples. Using FastQTL<sup>57</sup>, nominal P-value was generated  
616 between each gene and all the SNPs  $\pm 2$  Mb of rs398206 to test the alternative hypothesis that  
617 the slope of a linear regression model between the genotypes and expression levels deviates  
618 from 0. The same set of covariates as that used for the eQTL analyses was applied (three top  
619 genotype PCs and 10 top PEER factors). A Bonferroni-corrected cutoff of  $P < 0.0024$  for 21  
620 genes was then applied to select the genes showing marginal eQTL with rs398206. For sQTL,  
621 meQTL, and RNA stability QTL, we performed similar QTL analyses as our previous eQTL  
622 study using the same genotype data, population structure covariates, and statistical  
623 approaches. We replaced normalized gene expression levels with normalized splice junction  
624 events (sQTL), normalized methylation values (meQTL), and normalized mRNA stability  
625 measures (RNA stability QTL). We also re-calculated the top 15 PEER factors according to  
626 these phenotype values. For sQTL analysis, STAR<sup>58</sup> was used to map the RNA-Seq reads onto  
627 the genome (hg19) and then LeafCutter<sup>31</sup> was applied to quantify the splice junctions following  
628 the procedures described by the authors  
629 (<http://davidaknowles.github.io/leafcutter/articles/sQTL.html>). For meQTL analysis, we  
630 performed genome-wide DNA methylation profiling on Illumina Infinium Human Methylation  
631 450K BeadChip. Methylation levels of all 106 primary melanocyte samples was measured  
632 according to the manufacturer's instruction at Cancer Genomics Research Laboratory at NCI.  
633 Measurement of raw methylation densities and quality control were conducted using the  
634 RnBeads pipeline<sup>59</sup> and the minfi package<sup>60</sup> (<http://bioconductor.org/packages/minfi/>). In total,  
635 we retained 635,022 probes for the downstream meQTL analysis. No batch effects were  
636 identified and there were no plating issues. To obtain the final methylation levels (beta value) for  
637 meQTL analysis, normalization was performed using the preprocessFunnorm algorithm  
638 implemented in minfi R package<sup>60</sup>. For RNA stability QTL, we calculated mRNA half-life by  
639 measuring the differences between exonic and intronic read changes from 106 melanocyte

640 RNAseq data using REMBRANDTS package (<https://github.com/csqlab/REMBRANDTS>). The  
641 unbiased estimates of differential mRNA stability ( $\Delta$ exon– $\Delta$ intron–bias), relative to the average  
642 of all samples, was obtained from the output file “the stability.filtered.mx.txt”.

### 643 ***MX2* isoform analysis**

644 Taqman assays targeting unique junctions of *MX2* transcript isoforms were obtained from  
645 Thermo Fisher (full-length transcript: Hs01550809\_m1 and AP323EZ; ENST00000543692:  
646 APYMKKU; ENST00000418103: AP2W9U3). Custom assay design was based on Ensembl75  
647 GRCh37 annotation. RNA was isolated from primary cultures of melanocyte from 106  
648 individuals mainly of European decent<sup>24</sup>, and cDNA was synthesized using iScript Advanced  
649 cDNA Synthesis Kit (Bio-Rad). Taqman assays were performed in triplicates (technical  
650 replicates) to be averaged to single data points and normalized to *TBP* levels. *TBP* was  
651 selected among 16 conventional human control genes as being one of the least variable genes  
652 in melanocyte dataset based on RNAseq data.

### 653 **Cell culture**

654 Melanoma cell lines were grown in the medium containing RPMI1640, 10% FBS, 20 mM  
655 HEPES, and Amphotericin B/penicillin/streptomycin. All cell lines were tested negative for  
656 mycoplasma contamination.

### 657 **Luciferase assays**

658 For each tested SNP, the exact same 145bp sequence encompassing rs398206 as tested in  
659 MPRA was amplified from genomic DNA of HapMap CEU panel samples carrying either risk or  
660 protective allele. Primers were designed to carry 15 base 5' overhangs recognizing either side  
661 of pGL4.23 vector after KpnI single cut in both forward and reverse direction to facilitate  
662 recombination (**Supplementary Table 15**). Amplified fragments containing 145 bp sequence  
663 were then cloned into pGL4.23 vector using In-Fusion HD Cloning kit (Clontech). The resulting

664 constructs were co-transfected with renilla luciferase into melanoma cell lines (UACC903 and  
665 UACC502) using Lipofetamine 2000 reagent following the manufacturer's instructions (Thermo  
666 Fisher) in 24-well format. Cells were harvested at 24hrs after transfection for luciferase activity  
667 assays. All the experiments were performed in at least three biological replicates in sets of 6  
668 replicates.

### 669 **EMSA and super-shifts**

670 Forward and reverse strand of 21-mer DNA oligos encompassing rs398206 were synthesized  
671 with 5' biotin labeling (Life Technologies; **Supplementary Table 15**) and were annealed to  
672 make double stranded probes. Nuclear extracts were prepared from actively growing melanoma  
673 cells (UACC2331) using NE-PER Nuclear and Cytoplasmic Extraction Reagents (Thermo  
674 Scientific). Probes were bound to 2 µg nuclear extracts pre-incubated with 1 µg poly d(I-C)  
675 (Roche) or 100-750ng YY1 full-length recombinant protein (31332, Active Motif) in binding buffer  
676 containing 10 mM Tris (pH 7.5), 50 mM KCl, 1 mM DTT, and 10 mM MgCl<sub>2</sub> at 4°C for 30 min.  
677 For competition assay, unlabeled competitor oligos were added to the reaction mixture 5 min  
678 prior to the addition of probes. Completed reactions were run on 5% or 4-20% native acrylamide  
679 gel and transferred blots were developed using LightShift Chemiluminescent EMSA kit (Thermo  
680 Scientific) and imaged on Chemidoc Touch (Bio-Rad). For antibody-supershifts, 0.6-1.2 µg of  
681 antibody against YY1 (sc-1703X, Santa Cruz) or rabbit normal IgG (sc-2027, Santa Cruz) were  
682 bound to nuclear extract prior to poly d(I-C) (Roche) incubation at 4°C for 1 hr.

### 683 **Chromatin immunoprecipitation and genotyping**

684 Melanoma cells (UACC903 and UACC647) were fixed with 1% formaldehyde when ~85%  
685 confluent, following the instructions of Active Motif ChIP-IT high sensitivity kit.  $7.5 \times 10^6$  cells  
686 were then homogenized and sheared by sonication using a Bioruptor (Diagenode) at high  
687 setting for 15 min, with 30 sec on and 30 sec off cycles. Sheared chromatin from  $2 \times 10^6$  cells



688 were used for each immunoprecipitation with antibodies against YY1 (sc-1703X, Santa Cruz), or  
689 normal rabbit IgG (sc-2027; Santa Cruz) following the manufacturer's instructions. Purified  
690 pulled-down DNA or input DNA was assayed by SYBR Green qPCR for enrichment of target  
691 sites using primers listed in **Supplementary Table 15**. Relative quantity of each sample was  
692 driven from standard curve of each primer set and normalized to 1/100 input DNA. For  
693 genotyping rs398206, pulled down DNA, input DNA, or genomic DNA from UACC647 cell line  
694 (heterozygous for rs398206) was used as template DNA for Taqman genotyping assay (Assay  
695 ID: C\_\_\_2265405\_20). All experiments were performed in at least three biological replicates in  
696 sets of triplicates.

### 697 **Mass spectrometry**

698 Nuclear lysates for mass spectrometry analysis were collected from UACC903 cells grown in  
699 RPMI 1640 media (Gibco) supplemented with 10% FBS, 20 mM HEPES (pH 7.9), 100 U/ml  
700 penicillin and 100 µg/ml streptomycin (Gibco)<sup>61</sup>. 21bp oligonucleotide probes encompassing  
701 rs398206 were ordered via custom synthesis from Integrated DNA Technologies with 5'-  
702 biotinylation of the forward strand (**Supplementary Table 15**). Forward and reverse DNA oligos  
703 were annealed using a 1.5X molar excess of the reverse strand. DNA pulldowns and on-bead  
704 digestion were performed on a 96-well filterplate system as described previously<sup>62</sup>. In short, 500  
705 pmol of annealed DNA oligos were immobilized on 10 µl (20 µl slurry) Streptavidin-Sepharose  
706 beads (GE Healthcare) for each pulldown. Immobilized DNA oligos were incubated with 500 µg  
707 of UACC903 nuclear extract and 10 µg of non-specific competitor DNA (5 µg polydAdT, 5 µg  
708 polydIdC). After washing away unbound proteins, beads were resuspended in elution buffer (2  
709 M Urea, 100 mM TRIS (pH 8), 10 mM DTT), alkylated with 55 mM iodoacetamide, and on-bead  
710 digested with 0.25 µg trypsin. After desalting using Stage tips, peptides were labelled by stable  
711 isotope dimethyl labeling, as described previously<sup>62</sup>. Each pulldown was performed in duplicate  
712 and label swapping was performed between replicates to eliminate labeling bias. Matching light

713 and heavy peptides were combined and loaded onto a 30cm column (heated at 40°C) packed  
714 in-house with 1.8  $\mu$ m Reprosil-Pur C18-AQ (Dr. Maisch, GmbH). The peptides were eluted from  
715 the column using a gradient from 9 to 32% Buffer B (80% acetonitrile, 0.1% formic acid) in 114  
716 minutes at a flow rate of 250 nL/min using an Easy-nLC 1000 (Thermo Fisher Scientific).  
717 Samples were sprayed directly into a Thermo Fisher Orbitrap Fusion Tribrid mass spectrometer.  
718 Target values for full MS were set to 3e5 AGC target and a maximum injection time of 50 ms.  
719 Full MS were recorded at a resolution of 120000 at a scan range of 400-1500 m/z. The most  
720 intense precursors with a charge state between 2 and 7 were selected for MS/MS analysis, with  
721 an intensity threshold of 10000 and dynamic exclusion for 60s. Target values for MS/MS were  
722 set at 2e4 AGC target with a maximum injection time of 35ms. Ion trap scan rate was set to  
723 'rapid' with an isolation width of 1.6 m/z and collision energy of 35%. Scans were collected in  
724 data-dependent top-speed mode in cycles of 3 seconds. Thermo RAW files were analyzed with  
725 MaxQuant 1.6.0.1 by searching against the UniProt curated human proteome (released June  
726 2017) with standard settings<sup>63</sup>. Protein ratios were normalized by median ratio shifting and used  
727 for outlier calling. An outlier cutoff of 1.5 inter-quartile ranges in two out of two biological  
728 replicates was used.

### 729 **siRNA knockdown of YY1**

730 siRNA knockdown of YY1 was performed in the UACC647 melanoma cell line using ON-  
731 TARGETplus YY1 siRNAs (J-011796-08, J-011796-09, J-011796-10, and J-011796-11;  
732 Dharmacon). Non-targeting siRNA and siRNA targeting *GAPDH* were used for negative and  
733 positive control, respectively. Six picomole of siRNA was transfected into  $5 \times 10^4$  cells using  
734 Lipofectamine RNAiMax (Thermo Fisher) following the reverse transfection procedure in 24-well  
735 format. Cells were harvested at 72 hours after transfection for RNA isolation. The experiments  
736 were performed in 4 biological replicates in sets of 6 replicates. Total RNA was isolated using  
737 RNeasy kit (Qiagen) and cDNA was generated using iScript Advanced cDNA Synthesis Kit (Bio-

738 Rad). *MX2* levels were measured using Taqman probe set (Assay ID: Hs01550809\_m1)  
739 specifically detecting the full-length isoform and normalized to *GADPH* levels. qPCR triplicates  
740 (technical replicates) were averaged to be considered as one data point. Cells were also  
741 harvested for protein isolation from each biological replicate to assess knockdown efficiency by  
742 Western blot analysis. Total cell lysates were generated with RIPA buffer (Thermo Scientific,  
743 Pittsburgh, PA) and subjected to water bath sonication. Samples were resolved by 4-12% Bis-  
744 Tris ready gel (Invitrogen, Carlsbad, CA) electrophoresis. The primary antibodies used were  
745 rabbit anti-YY1 (sc-1703X, Santa Cruz), and mouse anti-GAPDH (sc-51907, Santa Cruz).

#### 746 **CRISPRi of rs398206**

747 CRISPRi was performed in UACC903 melanoma cell line (AA genotype for rs398206) using four  
748 different gRNAs targeting the genomic region on or near rs398206 (gRNA sequences are listed  
749 in **Supplementary Table 15**). Guide RNA target sites were identified using the sgRNA Scorer  
750 2.0 algorithm<sup>64</sup>. Non-targeting gRNA and gRNA targeting the adeno-associated virus site 1  
751 (AAVS1) were used as controls. For each sgRNA, forward and reverse oligonucleotides were  
752 annealed and cloned into vector carrying the sgRNA scaffold using the BsmBI restriction  
753 enzyme (NEB). For CRISPRi, 400ng of the vectors containing gRNAs, 500ng of dCas9-KRAB-  
754 MeCP2 (Addgene: 110821) or dCAS9 (Addgene: 47316), and 100 ng of pCMV6-entry vector  
755 (carrying neomycin resistance marker) were co-transfected into  $2 \times 10^5$  cells using  
756 Lipofectamine 2000 (Thermo Fisher) following a reverse transfection procedure scaled to 12-  
757 well format. Half the amount of DNA, lipofectamine, and cells were used when conducting 24-  
758 well format of culture. Cells were treated with 1mg/ml Geneticin (Gibco) 24 hours after  
759 transfection. Cells were harvested 48 hours after drug selection for RNA and protein isolation.  
760 The experiments were performed in at least 3 biological replicates in sets of 5-6 replicates. Total  
761 RNA was isolated using RNeasy kit (Qiagen) and cDNA was generated using iScript Advanced  
762 cDNA Synthesis Kit (Bio-Rad). *MX2* levels were measured using Taqman probe set (Assay ID:

763 Hs01550809\_m1) specifically detecting the full-length isoform and normalized to *GADPH* levels.  
764 qPCR triplicates (technical replicates) were averaged to be considered as one data point.  
765 UACC903 cells tested negative for mycoplasma. Cells were concomitantly transfected and  
766 harvested for protein isolation from one representative set of dCAS9 vs. dCas9-KRAB-MeCP2  
767 experiments (**Supplementary Fig 15B-C**) for western blotting following the same procedure  
768 described before. Proteins were separated on NuPAGE 3-8% Tris-Acetate Protein Gels  
769 (Thermo Fisher). The primary antibodies used were mouse anti-CAS9 (7A9-3A3, Active Motif),  
770 and mouse anti-GAPDH (sc-51907, Santa Cruz).

#### 771 **MX2 allele-specific expression**

772 Melanocyte cells were grown in Dermal Cell Basal Medium (ATCC PCS-200-030)  
773 supplemented with Melanocyte Growth Kit (ATCC PCS-200-041) and 1% amphotericin  
774 B/penicillin/streptomycin (120-096-711, Quality Biological) as described before<sup>24</sup>. Total RNA  
775 was isolated using a miRNeasy Mini kit (217004, Qiagen) further treated with CTAB-Urea  
776 following a previously described method<sup>65</sup> to remove excess melanin pigmentation. cDNA was  
777 synthesized from total RNA using iScript Advanced cDNA Synthesis Kit (Bio-Rad). Genomic  
778 DNA and cDNA were then genotyped for rs398206 using custom Taqman genotyping probe set  
779 (ANRWEYM) recognizing both genomic DNA and cDNA (ENST00000543692) with a 5bp 5'  
780 overhang on the left primer for cDNA based on Ensembl archive 75 annotation. From a total of  
781 44 samples heterozygous for rs398206, 27 samples passing QC (Ct values lower than 38 for  
782 both alleles in cDNA and genomic DNA) were used to calculate A/C allelic ratio based on dRn  
783 values.

#### 784 **MX2 over-expression and growth assays**

785 Melanoma cells and melanocyte growth assays were conducted using lentiviral transduction of  
786 *MX2* cDNA under the control of tetracycline-inducible promoter using pINDUCER20 vector

787 (Addgene). The *MX2* cDNA clone (RC206437) in the pCMV6-entry backbone was purchased  
788 from Origene and full-length *MX2* cDNA sequence was sub-cloned to pENTR-1A vector by  
789 introducing stop codons and removing 3' Myc-DDK tag before being transferred to  
790 pINDUCER20 vector (adapter sequence is listed in **Supplementary Table 15**). BamHI and MluI  
791 sites on pCMV6-entry vector and BamHI and XhoI sites on pENTR-1A were used for sub-  
792 cloning. Primary human melanocytes were obtained from Invitrogen and/or the Yale SPORE in  
793 Skin Cancer Specimen Resource Core and grown under standard culture conditions using  
794 Medium M254 (Invitrogen) with Human Melanocyte Growth Supplement-2 (Invitrogen). For  
795 lentivirus production, lentiviral vectors were co-transfected into HEK293FT cells with packaging  
796 vectors psPAX2, pMD2-G, and pCAG4-RTR2. Virus was collected two days after transfection  
797 and concentrated by Vivaspin20. Cells were incubated with virus for 24 hours, followed by drug  
798 selection (1 mg/ml Geneticin, Gibco), before being subjected to experimental treatments and  
799 assays. For xCELLigence assays, optimized number of cells for each cell type were seeded to  
800 RTCA E-plate 16 and grown until the Cell Index stabilized. Varying amounts of doxycycline were  
801 then added, and the Cell Index was monitored for 72 hours. All experiments were performed in  
802 3 biological replicates in sets of triplicates. For each round, cells were concomitantly infected  
803 and harvested for protein isolation at 72 hours of doxycycline treatment to assess *MX2* levels by  
804 western blotting. The primary antibodies used were rabbit anti-*MX2* (NBP1-81018, Novus  
805 Biologicals), and mouse anti-GAPDH (sc-51907, Santa Cruz).

### 806 **Differentially expressed genes in *MX2*-high melanocytes**

807 From the RNA-seq data of primary melanocytes (n = 106), we profiled differentially expressed  
808 genes (DEGs) between *MX2*-high (top 25%; n = 28) and *MX2*-low (bottom 25%; n = 28)  
809 samples. Total counts of mappable reads for each annotated gene (GENCODE v19) was  
810 obtained using featureCounts from Rsubread package<sup>66</sup>. The SARTools<sup>67</sup> workflow was used to  
811 perform quality control, apply differential analysis and generate reports based on the count data

812 from both *MX2*-high and *MX2*-low groups. edgeR<sup>68</sup> was selected as the statistical methodology  
813 to determine differential expression based on the negative binomial distributions. The final DEG  
814 list with criteria  $FDR < 0.01$  and  $|\log_2 \text{fold difference}| > 1$  was applied to Ingenuity Pathway  
815 Analysis (IPA).

## 816 **RNA-seq of melanocytes over-expressing MX2**

817 For RNA-seq analyses of *MX2* over-expressing melanocytes, primary cultures of melanocytes  
818 from three individuals (C23, C29, and C53) were selected based on their low basal *MX2*  
819 expression levels. Cells were grown and infected with the lentiviral system using *MX2* cDNA  
820 cloned into pINDUCER20 or empty vector as described above. Following drug selection, cells  
821 were treated with 0 or 100 ng/ml doxycycline (total of three conditions for each cell line: 0 or 100  
822 ng/ml doxycycline for pINDUCER20-*MX2* infected cells, and 100 ng/ml doxycycline treatment  
823 for empty vector infected cells) for 72 hours before being harvested for RNA and protein  
824 isolation. For each cell line, three separate infections (biological replicates) were performed and  
825 sequenced for transcriptome analysis (total of 27 samples sequenced: 3 conditions, 3 cell lines,  
826 and 3 biological replicates). Western blotting was performed for each cell line to estimate the  
827 level of *MX2* induction. Total RNA was isolated in the same way as previously described<sup>24</sup>.  
828 Sequencing library was constructed following Illumina TruSeq Standard mRNA Library protocol.  
829 150 bp paired-end sequencing was performed on NovaSeq 6000 to achieve at least 50 million  
830 reads per sample (range 53.0-82.4 M). FASTQ raw data was received and quality control was  
831 performed by the MultiQC RNA-Seq module<sup>69</sup> (<https://multiqc.info>). Quasi-mapping algorithm  
832 Salmon<sup>70</sup> was used to provide fast and bias-aware quantification of transcript expression using  
833 GENCODE human transcripts database (release 29). A principal component analysis was  
834 performed based on the expression qualification, and based on the results, differentially  
835 expressed genes (DEGs) were calculated with DESeq<sup>71</sup> adjusting for cell line, biological  
836 replicate, and library construction batch. The expression threshold  $FDR < 0.1$  was recognized

837 as DEGs after *MX2* over expression by comparing pINDUCER20-*MX2*-infected cells with (100  
838 ng/ml) or without doxycycline treatment. The list of significant DEGs was analyzed using IPA for  
839 pathway enrichment analysis. Threshold of  $P < 0.05$  and non-zero z-scores were used for  
840 identifying significantly enriched pathways. DEG analysis of cells infected with empty vector  
841 followed by 100 ng/ml doxycycline treatment vs. those infected with pINDUCER20-*MX2* with no  
842 treatment was performed as a control. IPA analysis using DEGs from this control analysis (1838  
843 genes at FDR  $< 0.01$  cutoff) did not overlap in the same direction of change with the main  
844 pathways enriched by *MX2* overexpression except for “Apelin Endothelial Signaling Pathway”  
845 (**Supplementary Table 14 and 16**).

#### 846 **Zebrafish melanoma model**

847 The *MX2* open reading frame was cloned under the control of the melanocyte-specific *mitfa*  
848 promoter into the miniCoopR expression vector<sup>44</sup>. Tg(*mitfa:BRAF<sup>V600E</sup>*), *p53*<sup>-/-</sup>, *mitfa*<sup>-/-</sup> embryos  
849 were injected at the one cell stage with either miniCoopR *mitfa:MX2* or miniCoopR *mitfa:EGFP*  
850 (as a negative control). Embryos were sorted for melanocyte rescue at 5 days post fertilization  
851 and raised to adulthood. Tumor formation was monitored weekly between weeks 10 and 19  
852 post-injection. There were no observable differences between the negative control and *MX2*  
853 group in melanocyte rescue efficiency, overall pigmentation of fish, and morphology or  
854 pigmentation of melanomas. Three independent experiments of different sample sizes were  
855 performed by independent injections of DNA constructs replicating similar results. Kaplan-Meier  
856 survival curve was plotted using the combined data from these three sets, and P-value was  
857 calculated using log-rank test. Zebrafish were handled humanely according to our vertebrate  
858 animal protocol that implements the principles of replacement, reduction, and refinement (‘three  
859 Rs’), has been approved by Boston Children’s Hospital Animal Care Committee, and includes  
860 detailed experimental procedures for all *in vivo* experiments described in this paper.



## 861 **Statistical analyses**

862 All cell-based experiments were repeated at least three times with separate cell cultures. When  
863 a representative set is shown, replicate experiments displayed similar patterns. For all plots,  
864 individual data points are shown with the median or mean, range (maximum and minimum), and  
865 25th and 75th percentiles (where applicable). The statistical method, number of data points, and  
866 number and type of replicates are indicated in each figure legend.

## 867 **Data availability**

868 The data generated during the current study are deposited in Gene Expression Omnibus  
869 (<https://www.ncbi.nlm.nih.gov/geo/>) as a SuperSeries under the accession number GSE129250.  
870 A complete list of oligo sequences for MPRA libraries and complete processed MPRA data can  
871 be found in **Supplementary File 1** as an R object. Melanocyte eQTL data and expression data  
872 from 106 individuals are available through the database of Genotypes and Phenotypes (dbGAP,  
873 <https://www.ncbi.nlm.nih.gov/gap>) under accession number phs001500.v1.p1.

## 874 **URLs**

875 ENCODE Project, <https://www.encodeproject.org/>; Roadmap Epigenomics Project,  
876 <http://www.roadmapepigenomics.org/>; UCSC Genome Browser, <http://genome.ucsc.edu/>; GTEx  
877 Portal, <http://www.gtexportal.org/home/testyourown>; TCGA, <https://cancergenome.nih.gov/>;  
878 motifbreakR, <http://bioconductor.org/packages/motifbreakR/>; PAINTOR,  
879 [https://github.com/gkichaev/PAINTOR\\_V3.0](https://github.com/gkichaev/PAINTOR_V3.0); 3D Genome Browser,  
880 <http://promoter.bx.psu.edu/hi-c/>; LeafCutter,  
881 <https://davidaknowles.github.io/leafcutter/articles/sQTL.html>; TIMER,  
882 <https://cistrome.shinyapps.io/timer/>; CIBERSORT, <https://cibersort.stanford.edu/>; minfi:  
883 <http://bioconductor.org/packages/minfi/>; REMBRANDTS:  
884 <https://github.com/csglab/REMBRANDTS>



885 **Acknowledgements**

886 The results appearing here are in part based on data generated by the TCGA Research  
887 Network (<http://cancergenome.nih.gov/>). Data were also obtained from the GTEx Portal (V6p)  
888 on 2 December 2015 or dbGaP accession phs000424.v6.p1 on 17 December 2015. We would  
889 like to thank K. Jones, S. Bass, K. Teshome, S. Brodie and other members at the National  
890 Cancer Institute Cancer Genomics Research Laboratory (CGR) for help with sequencing efforts  
891 and xCELLigence assays, B. Hennessey, H. Kong, and L. Mehl from the National Cancer  
892 Institute, Laboratory of Translational Genomics for proofreading the manuscript, and A.  
893 Jermusyk, O. Onabajo, L. Jessop, and L. Amundadottir from National Cancer Institute,  
894 Laboratory of Translational Genomics for helpful discussions, and S. Loftus and W. Pavan from  
895 National Human Genome Research Institute for the help with melanocyte eQTL study. This  
896 work has been supported by the Intramural Research Program (IRP) of the Division of Cancer  
897 Epidemiology and Genetics, National Cancer Institute, US National Institutes of Health. The  
898 content of this publication does not necessarily reflect the views or policies of the US  
899 Department of Health and Human Services, nor does mention of trade names, commercial  
900 products, or organizations imply endorsement by the US government. The Vermeulen lab is part  
901 of the OncoCode Institute, which is partly funded by the Dutch Cancer Society (KWF).

902 **Author contributions**

903 J.C., T.Z., and K.M.B. conceived and planned the study. J.C., T.Z., L.M.C., M.A.K., K.Y., and  
904 B.P. designed and analyzed MPRA assays. J.C., A.V. and M.X. conducted experiments for  
905 MPRA and MX2 molecular characterization. R.C. designed CRISPR assays. T.Z. performed all  
906 the data analyses. M.M.M., C.G., and M.V. conducted proteomics analyses. M.B., J.T., B.P.,  
907 C.H., F.D., J.H.B., M.H.L., and M.M.I. performed fine-mapping of melanoma GWAS data. J.A.,

908 H.R., and L.I.Z. designed and performed zebrafish experiments. J.C., T.Z., and K.M.B. wrote the  
909 manuscript. K.M.B. and S.J.C. helped supervise the project.

## 910 **Competing interests**

911 The authors declare no competing financial interests.

## 912 **References**

- 913 1. Law, M.H. *et al.* Genome-wide meta-analysis identifies five new susceptibility loci for cutaneous  
914 malignant melanoma. *Nat Genet* **47**, 987-995 (2015).
- 915 2. Gudbjartsson, D.F. *et al.* ASIP and TYR pigmentation variants associate with cutaneous  
916 melanoma and basal cell carcinoma. *Nat Genet* **40**, 886-91 (2008).
- 917 3. Brown, K.M. *et al.* Common sequence variants on 20q11.22 confer melanoma susceptibility. *Nat*  
918 *Genet* **40**, 838-40 (2008).
- 919 4. Bishop, D.T. *et al.* Genome-wide association study identifies three loci associated with  
920 melanoma risk. *Nat Genet* **41**, 920-5 (2009).
- 921 5. Falchi, M. *et al.* Genome-wide association study identifies variants at 9p21 and 22q13 associated  
922 with development of cutaneous nevi. *Nat Genet* **41**, 915-9 (2009).
- 923 6. Iles, M.M. *et al.* A variant in FTO shows association with melanoma risk not due to BMI. *Nat*  
924 *Genet* **45**, 428-32, 432e1 (2013).
- 925 7. Rafnar, T. *et al.* Sequence variants at the TERT-CLPTM1L locus associate with many cancer types.  
926 *Nat Genet* **41**, 221-7 (2009).
- 927 8. Macgregor, S. *et al.* Genome-wide association study identifies a new melanoma susceptibility  
928 locus at 1q21.3. *Nat Genet* **43**, 1114-8 (2011).
- 929 9. Barrett, J.H. *et al.* Genome-wide association study identifies three new melanoma susceptibility  
930 loci. *Nat Genet* **43**, 1108-13 (2011).
- 931 10. Ransohoff, K.J. *et al.* Two-stage genome-wide association study identifies a novel susceptibility  
932 locus associated with melanoma. *Oncotarget* **8**, 17586-17592 (2017).
- 933 11. Duffy, D.L. *et al.* Multiple pigmentation gene polymorphisms account for a substantial  
934 proportion of risk of cutaneous malignant melanoma. *J Invest Dermatol* **130**, 520-8 (2010).
- 935 12. Beaumont, K.A. *et al.* Receptor function, dominant negative activity and phenotype correlations  
936 for MC1R variant alleles. *Hum Mol Genet* **16**, 2249-60 (2007).
- 937 13. Tsetschladsze, Z.R. *et al.* Functional assessment of human coding mutations affecting skin  
938 pigmentation using zebrafish. *PLoS One* **7**, e47398 (2012).
- 939 14. Halaban, R. *et al.* Endoplasmic reticulum retention is a common defect associated with  
940 tyrosinase-negative albinism. *Proc Natl Acad Sci U S A* **97**, 5889-94 (2000).
- 941 15. Liu, F. *et al.* Genetics of skin color variation in Europeans: genome-wide association studies with  
942 functional follow-up. *Hum Genet* **134**, 823-35 (2015).
- 943 16. Duffy, D.L. *et al.* Novel pleiotropic risk loci for melanoma and nevus density implicate multiple  
944 biological pathways. *Nat Commun* **9**, 4774 (2018).
- 945 17. Duffy, D.L. *et al.* IRF4 variants have age-specific effects on nevus count and predispose to  
946 melanoma. *Am J Hum Genet* **87**, 6-16 (2010).

- 947 18. Choi, J. *et al.* A common intronic variant of PARP1 confers melanoma risk and mediates  
948 melanocyte growth via regulation of MITF. *Nat Genet* **49**, 1326-1335 (2017).
- 949 19. Fang, J. *et al.* Functional characterization of a multi-cancer risk locus on chr5p15.33 reveals  
950 regulation of TERT by ZNF148. *Nat Commun* **8**, 15034 (2017).
- 951 20. Ulirsch, J.C. *et al.* Systematic Functional Dissection of Common Genetic Variation Affecting Red  
952 Blood Cell Traits. *Cell* **165**, 1530-1545 (2016).
- 953 21. Kheradpour, P. *et al.* Systematic dissection of regulatory motifs in 2000 predicted human  
954 enhancers using a massively parallel reporter assay. *Genome Res* **23**, 800-11 (2013).
- 955 22. Melnikov, A. *et al.* Systematic dissection and optimization of inducible enhancers in human cells  
956 using a massively parallel reporter assay. *Nat Biotechnol* **30**, 271-7 (2012).
- 957 23. GTEx Consortium *et al.* Genetic effects on gene expression across human tissues. *Nature* **550**,  
958 204-213 (2017).
- 959 24. Zhang, T. *et al.* Cell-type-specific eQTL of primary melanocytes facilitates identification of  
960 melanoma susceptibility genes. *Genome Res* **28**, 1621-1635 (2018).
- 961 25. Hoggart, C.J., Whittaker, J.C., De Iorio, M. & Balding, D.J. Simultaneous analysis of all SNPs in  
962 genome-wide and re-sequencing association studies. *PLoS Genet* **4**, e1000130 (2008).
- 963 26. Verfaillie, A. *et al.* Decoding the regulatory landscape of melanoma reveals TEADS as regulators  
964 of the invasive cell state. *Nat Commun* **6**, 6683 (2015).
- 965 27. Melnikov, A., Zhang, X., Rogov, P., Wang, L. & Mikkelsen, T.S. Massively parallel reporter assays  
966 in cultured mammalian cells. *J Vis Exp* (2014).
- 967 28. Coetzee, S.G., Coetzee, G.A. & Hazelett, D.J. motifbreakR: an R/Bioconductor package for  
968 predicting variant effects at transcription factor binding sites. *Bioinformatics* **31**, 3847-9 (2015).
- 969 29. Kichaev, G. *et al.* Improved methods for multi-trait fine mapping of pleiotropic risk loci.  
970 *Bioinformatics* **33**, 248-255 (2017).
- 971 30. Alkallas, R., Fish, L., Goodarzi, H. & Najafabadi, H.S. Inference of RNA decay rate from  
972 transcriptional profiling highlights the regulatory programs of Alzheimer's disease. *Nat Commun*  
973 **8**, 909 (2017).
- 974 31. Li, Y.I. *et al.* Annotation-free quantification of RNA splicing using LeafCutter. *Nat Genet* **50**, 151-  
975 158 (2018).
- 976 32. Baylin, S.B. & Jones, P.A. A decade of exploring the cancer epigenome - biological and  
977 translational implications. *Nat Rev Cancer* **11**, 726-34 (2011).
- 978 33. Kulis, M. *et al.* Epigenomic analysis detects widespread gene-body DNA hypomethylation in  
979 chronic lymphocytic leukemia. *Nat Genet* **44**, 1236-42 (2012).
- 980 34. Maunakea, A.K. *et al.* Conserved role of intragenic DNA methylation in regulating alternative  
981 promoters. *Nature* **466**, 253-7 (2010).
- 982 35. Varley, K.E. *et al.* Dynamic DNA methylation across diverse human cell lines and tissues. *Genome*  
983 *Res* **23**, 555-67 (2013).
- 984 36. Wolff, E.M. *et al.* Hypomethylation of a LINE-1 promoter activates an alternate transcript of the  
985 MET oncogene in bladders with cancer. *PLoS Genet* **6**, e1000917 (2010).
- 986 37. Gordon, S., Akopyan, G., Garban, H. & Bonavida, B. Transcription factor YY1: structure, function,  
987 and therapeutic implications in cancer biology. *Oncogene* **25**, 1125-42 (2006).
- 988 38. Li, J. *et al.* YY1 regulates melanocyte development and function by cooperating with MITF. *PLoS*  
989 *Genet* **8**, e1002688 (2012).
- 990 39. Yeo, N.C. *et al.* An enhanced CRISPR repressor for targeted mammalian gene regulation. *Nat*  
991 *Methods* **15**, 611-616 (2018).
- 992 40. Weintraub, A.S. *et al.* YY1 Is a Structural Regulator of Enhancer-Promoter Loops. *Cell* **171**, 1573-  
993 1588 e28 (2017).

- 994 41. Goujon, C. *et al.* Human MX2 is an interferon-induced post-entry inhibitor of HIV-1 infection.  
995 *Nature* **502**, 559-62 (2013).
- 996 42. Kane, M. *et al.* MX2 is an interferon-induced inhibitor of HIV-1 infection. *Nature* **502**, 563-6  
997 (2013).
- 998 43. King, M.C., Raposo, G. & Lemmon, M.A. Inhibition of nuclear import and cell-cycle progression  
999 by mutated forms of the dynamin-like GTPase MxB. *Proc Natl Acad Sci U S A* **101**, 8957-62  
1000 (2004).
- 1001 44. Ceol, C.J. *et al.* The histone methyltransferase SETDB1 is recurrently amplified in melanoma and  
1002 accelerates its onset. *Nature* **471**, 513-7 (2011).
- 1003 45. Amit, I. *et al.* A module of negative feedback regulators defines growth factor signaling. *Nat*  
1004 *Genet* **39**, 503-12 (2007).
- 1005 46. Katsuoka, F. & Yamamoto, M. Small Maf proteins (MafF, MafG, MafK): History, structure and  
1006 function. *Gene* **586**, 197-205 (2016).
- 1007 47. Denat, L., Kadarko, A.L., Marrot, L., Leachman, S.A. & Abdel-Malek, Z.A. Melanocytes as  
1008 instigators and victims of oxidative stress. *J Invest Dermatol* **134**, 1512-1518 (2014).
- 1009 48. Olson, O.C. & Joyce, J.A. Cysteine cathepsin proteases: regulators of cancer progression and  
1010 therapeutic response. *Nat Rev Cancer* **15**, 712-29 (2015).
- 1011 49. McIlwain, D.R., Berger, T. & Mak, T.W. Caspase functions in cell death and disease. *Cold Spring*  
1012 *Harb Perspect Biol* **5**, a008656 (2013).
- 1013 50. Michailidou, K. *et al.* Association analysis identifies 65 new breast cancer risk loci. *Nature* **551**,  
1014 92-94 (2017).
- 1015 51. Stacey, S.N. *et al.* New basal cell carcinoma susceptibility loci. *Nat Commun* **6**, 6825 (2015).
- 1016 52. Barrett, J.H. *et al.* Fine mapping of genetic susceptibility loci for melanoma reveals a mixture of  
1017 single variant and multiple variant regions. *Int J Cancer* **136**, 1351-60 (2015).
- 1018 53. Stephens, M. & Balding, D.J. Bayesian statistical methods for genetic association studies. *Nat*  
1019 *Rev Genet* **10**, 681-90 (2009).
- 1020 54. Vignal, C.M., Bansal, A.T. & Balding, D.J. Using penalised logistic regression to fine map HLA  
1021 variants for rheumatoid arthritis. *Ann Hum Genet* **75**, 655-64 (2011).
- 1022 55. Long, J.S. & Ervin, L.H. Using Heteroscedasticity Consistent Standard Errors in the Linear  
1023 Regression Model. *The American Statistician* **54**, 217-224 (2000).
- 1024 56. Kulakovskiy, I.V. *et al.* HOCOMOCO: towards a complete collection of transcription factor  
1025 binding models for human and mouse via large-scale ChIP-Seq analysis. *Nucleic Acids Res* **46**,  
1026 D252-D259 (2018).
- 1027 57. Ongen, H., Buil, A., Brown, A.A., Dermitzakis, E.T. & Delaneau, O. Fast and efficient QTL mapper  
1028 for thousands of molecular phenotypes. *Bioinformatics* **32**, 1479-85 (2016).
- 1029 58. Dobin, A. *et al.* STAR: ultrafast universal RNA-seq aligner. *Bioinformatics* **29**, 15-21 (2013).
- 1030 59. Assenov, Y. *et al.* Comprehensive analysis of DNA methylation data with RnBeads. *Nat Methods*  
1031 **11**, 1138-1140 (2014).
- 1032 60. Aryee, M.J. *et al.* Minfi: a flexible and comprehensive Bioconductor package for the analysis of  
1033 Infinium DNA methylation microarrays. *Bioinformatics* **30**, 1363-9 (2014).
- 1034 61. Spruijt, C.G., Baymaz, H.I. & Vermeulen, M. Identifying specific protein-DNA interactions using  
1035 SILAC-based quantitative proteomics. *Methods Mol Biol* **977**, 137-57 (2013).
- 1036 62. Hubner, N.C., Nguyen, L.N., Hornig, N.C. & Stunnenberg, H.G. A quantitative proteomics tool to  
1037 identify DNA-protein interactions in primary cells or blood. *J Proteome Res* **14**, 1315-29 (2015).
- 1038 63. Cox, J. & Mann, M. MaxQuant enables high peptide identification rates, individualized p.p.b.-  
1039 range mass accuracies and proteome-wide protein quantification. *Nat Biotechnol* **26**, 1367-72  
1040 (2008).

- 1041 64. Chari, R., Yeo, N.C., Chavez, A. & Church, G.M. sgRNA Scorer 2.0: A Species-Independent Model  
1042 To Predict CRISPR/Cas9 Activity. *ACS Synth Biol* **6**, 902-904 (2017).
- 1043 65. Lagonigro, M.S. *et al.* CTAB-urea method purifies RNA from melanin for cDNA microarray  
1044 analysis. *Pigment Cell Res* **17**, 312-5 (2004).
- 1045 66. Liao, Y., Smyth, G.K. & Shi, W. The R package Rsubread is easier, faster, cheaper and better for  
1046 alignment and quantification of RNA sequencing reads. *Nucleic Acids Res* (2019).
- 1047 67. Varet, H., Brillet-Gueguen, L., Coppee, J.Y. & Dillies, M.A. SARTools: A DESeq2- and EdgeR-Based  
1048 R Pipeline for Comprehensive Differential Analysis of RNA-Seq Data. *PLoS One* **11**, e0157022  
1049 (2016).
- 1050 68. Robinson, M.D., McCarthy, D.J. & Smyth, G.K. edgeR: a Bioconductor package for differential  
1051 expression analysis of digital gene expression data. *Bioinformatics* **26**, 139-40 (2010).
- 1052 69. Ewels, P., Magnusson, M., Lundin, S. & Kaller, M. MultiQC: summarize analysis results for  
1053 multiple tools and samples in a single report. *Bioinformatics* **32**, 3047-8 (2016).
- 1054 70. Patro, R., Duggal, G., Love, M.I., Irizarry, R.A. & Kingsford, C. Salmon provides fast and bias-  
1055 aware quantification of transcript expression. *Nat Methods* **14**, 417-419 (2017).
- 1056 71. Love, M.I., Huber, W. & Anders, S. Moderated estimation of fold change and dispersion for RNA-  
1057 seq data with DESeq2. *Genome Biol* **15**, 550 (2014).

1058

## 1059 **Figure Legends**

1060 **Figure 1. MPRA identified 39 functional variants from 16 melanoma GWAS loci** Volcano  
1061 plots of MPRA results for each melanoma GWAS locus. Inverse P-values and effect sizes of  
1062 allelic difference from UACC903 transfections are shown for each of the 16 loci tested. Dashed  
1063 horizontal lines indicate the FDR 1% cutoff. The most significant SNP from each locus is  
1064 labeled. Putative function of significant MPRA variants are shown as activator, repressor, or  
1065 both (expression levels of either allele is higher, lower, or higher and lower than those of  
1066 scrambled sequence).

1067 **Figure 2. rs398206 is a functional cis-regulatory variant and a significant cis-eQTL for**  
1068 **MX2 levels in melanocytes** (A) Variants that were tested in MPRA from the Chr21q22.3  
1069 melanoma locus are shown relative to the genomic position of *MX2*. Only the variants from the  
1070 primary GWAS signal are shown (the other three from a secondary signal are located upstream  
1071 of the *MX2* genic region). ChromHMM annotation (Primary Core Marks segmentation) of Penis  
1072 Foreskin Melanocyte Primary Cells from Roadmap Epigenomics Project is shown

1073 (Red/OrangeRed: Active\_TSS/Flanking\_Active\_TSS, Yellow/GreenYellow:  
1074 Enhancers/Genic\_enhancers, Green/DarkGreen: Strong\_transcription/Weak\_transcription).  
1075 Melanoma FAIRE-seq track of 11 samples is from a study by Verfaillie and colleagues<sup>26</sup>.  
1076 Ensembl predicted transcripts from archive 75 are shown. (B) Transcriptional activity of 145bp  
1077 sequences encompassing rs398206 from MPRA are shown as normalized tag counts ( $\log_2(\text{RNA}$   
1078 TPM/DNA TPM)). Results from UACC903 melanoma cells are shown for both alleles in forward  
1079 and reverse directions, where results from promoter and enhancer constructs were combined.  
1080 Center lines show the medians; box limits indicate the 25th and 75th percentiles as determined  
1081 by R software; whiskers extend 1.5 times the interquartile range from the 25th and 75th  
1082 percentiles, outliers are represented by dots. Density is reflected in the width of the shape. (C)  
1083 Individual luciferase activity assays of 145bp sequences encompassing rs398206 is shown for  
1084 UACC903. pGL4.23 construct including minimal TATA promoter was used. One representative  
1085 set is shown from three biological replicates. Mean with SEM, n = 6. All constructs are  
1086 significantly higher than pGL4.23 (TATA) control ( $P < 0.0001$ , two-tailed, unpaired t-test  
1087 assuming unequal variance). (D) eQTL plot of *MX2* levels in primary melanocytes in relation to  
1088 rs398206 is shown for three genotype groups.

1089 **Figure 3. rs398206 displays allele-preferential binding to YY1** (A) Quantitative mass-  
1090 spectrometry of rs398206 using nuclear extract of UACC903 and 21bp double-stranded DNA  
1091 probes with A (risk) or C (protective) alleles. A-allele specific interacting proteins are shown in  
1092 the bottom right quadrant, and C-allele specific interactors in the top left quadrant. Using label-  
1093 swapping of high- or low-mass label, the A-bound/C-bound ratio is shown on the x-axis, and the  
1094 C-bound/A-bound ratio on the y-axis. Only the protein names of inter-quartile > 3 are shown. (B)  
1095 YY1 binding motif is shown as a position weight matrix at the top (motif obtained from  
1096 HOCOMOCO database and plotted using weblogo3). The genomic sequence surrounding  
1097 rs398206 is shown at the bottom with the risk-associated A allele matching the consensus YY1-



1098 binding motif. Genomic positions are hg19. (C-D) EMSAs using 21bp double-stranded DNA  
1099 probes with A or C alleles of rs398206 and nuclear extract from UACC2331 melanoma cells (C)  
1100 or purified recombinant YY1 protein (D). Antibody super-shift using anti-YY1 antibody is shown  
1101 at the last lanes of (C), where the A-specific band (arrows) is diminished.

1102 **Figure 4. YY1 preferentially binds to the rs398206-A allele in melanoma cells (A)**

1103 Chromatin immunoprecipitation using anti-YY1 antibody or normal IgG followed by qPCR. On  
1104 the top panel, genomic positions of the amplicons using five qPCR primer sets are shown  
1105 relative to rs398206 (red dashed line) in the first intron of *MX2*. qPCR results from two  
1106 melanoma cell lines are shown on the bottom panel with genotype for rs398206 indicated in the  
1107 X-axis label. Relative quantities are shown as fold over input DNA. Mean of PCR triplicates with  
1108 SEM are plotted. One representative set of three biological replicates for each cell line is shown.  
1109 (B) Taqman genotyping of rs398206 using YY1 ChIP DNA in UACC647 melanoma cells  
1110 (heterozygous for rs398206). The blue shaded areas mark HapMap CEU DNA controls showing  
1111 separation of three genotype clusters. qPCR triplicates were plotted separately. One  
1112 representative set of three biological replicates is shown. Normalized A and C allele intensity is  
1113 shown as dRn values on x and y-axis, respectively. (C) Combined plot for A/C allelic ratio from  
1114 three rounds of biological replicates of UACC647. Each dot represents A/C ratio calculated from  
1115  $2^{-(\text{average } dCt(\text{alleleA}-\text{alleleC}))}$  from qPCR triplicates. Input includes three 10-fold serial dilutions from  
1116 each round. Mean with SEM are plotted. Two-tailed Mann-Whitney U test was used.

1117 **Figure 5. YY1 and rs398206 affect *MX2* expression in melanoma cells (A)** YY1 was knocked

1118 down using four different siRNAs in UACC647 cells, and *MX2* levels were measured. *GAPDH*-  
1119 normalized *MX2* mRNA levels are shown as fold change over those from non-targeting siRNA.  
1120 Four biological replicates of n = 6 were combined (total n = 24). (B) CRISPRi using dCAS9-  
1121 KRAB-MeCP2 and four different gRNAs targeting rs398206 in UACC903 cells. *MX2* mRNA  
1122 levels (*GAPDH*-normalized) are shown as fold change over those from non-targeting gRNA.



1123 Three biological replicates of  $n = 6$  were combined (total  $n = 18$ , except gRNA-3,  $n=17$ ). gRNA  
1124 1, 3, and 4 directly overlap rs398206. gRNA 2 targets ~25bp upstream of rs398206. AAVS1  
1125 (gRNA targeting adeno-associated virus integration site on Chr19). Box: Median and 25<sup>th</sup> to 75<sup>th</sup>  
1126 percentile. Whisker: 10<sup>th</sup> to 90<sup>th</sup> percentile. P - values are shown from one-sample Wilcoxon test  
1127 (two-sided) for difference from non-targeting siRNA/gRNA. Dotted line denotes the *MX2* levels  
1128 in non-targeting siRNA/gRNA control.

1129 **Figure 6. MX2 accelerates melanoma formation** (A-B) Cell growth and movement of human  
1130 primary melanocytes (A) or melanoma cell line UACC2545 (B) infected with an inducible  
1131 lentiviral construct of *MX2* cDNA or Empty pINDUCER20 vector were measured on  
1132 xCELLigence system. Cell Index values were normalized relative to those at the time of  
1133 doxycycline addition (dotted vertical line: Dox). The amount of doxycycline is shown in ng/ml  
1134 and color-coded. Mean Normalized Cell Index (colored dots) and SD (gray vertical lines) are  
1135 plotted ( $n = 3$ ). A representative set of three biological replicates is shown. (C-D) Ingenuity  
1136 Pathway Analysis of differentially expressed genes from *MX2*-high versus *MX2*-low  
1137 melanocytes from 106 individuals (C) or RNA sequencing of *MX2*-overexpressed versus control  
1138 melanocytes from 3 individuals (D). (C) 252 differentially expressed genes (FDR < 1% and >2-  
1139 fold change) between *MX2*-high and *MX2*-low melanocytes (top and bottom quantile based on  
1140 *MX2* levels;  $n = 28$  each) from 106 individuals were used as input for the analysis. (D) 158  
1141 differentially expressed genes (FDR < 10%) between *MX2*-overexpressing (100 ng/ml  
1142 doxycycline) versus control (no doxycycline) melanocytes using 3 biological replicates for 3  
1143 individuals were used as input for the analysis. Significantly enriched canonical pathways ( $P <$   
1144 0.05 and  $|Z\text{-score}| > 1$ ) are color-coded for the direction of effect relative to *MX2*-high  
1145 melanocytes (C) or *MX2*-overexpressing melanocytes (D). A weaker to stronger shade of each  
1146 color represent the relative magnitude of Z-scores: Positive Z-score between 1 and 2.646 and  
1147 negative Z-score between -1 and -3.464 (C) or positive between 1 and 1.134 and negative

1148 between -1.342 and -2.236 (D), where lightest red is closer to 1 and lightest blue is closer to -1.  
1149 (E) Melanoma-free survival curves of a zebrafish melanoma model<sup>44</sup> (*Tg(mitfa:BRAF<sup>V600E</sup>), p53-*  
1150 *-/-, mitfa-/-*). The fish were injected at the one cell stage with either miniCoopR *mitfa:MX2* or  
1151 miniCoopR *mitfa:EGFP* and monitored weekly for melanoma formation. The percentage of  
1152 melanoma-free fish was combined from three independent experiments and plotted. Log-rank  
1153 test was used.

Potential function ● Activator ● Repressor ● Both ● NA

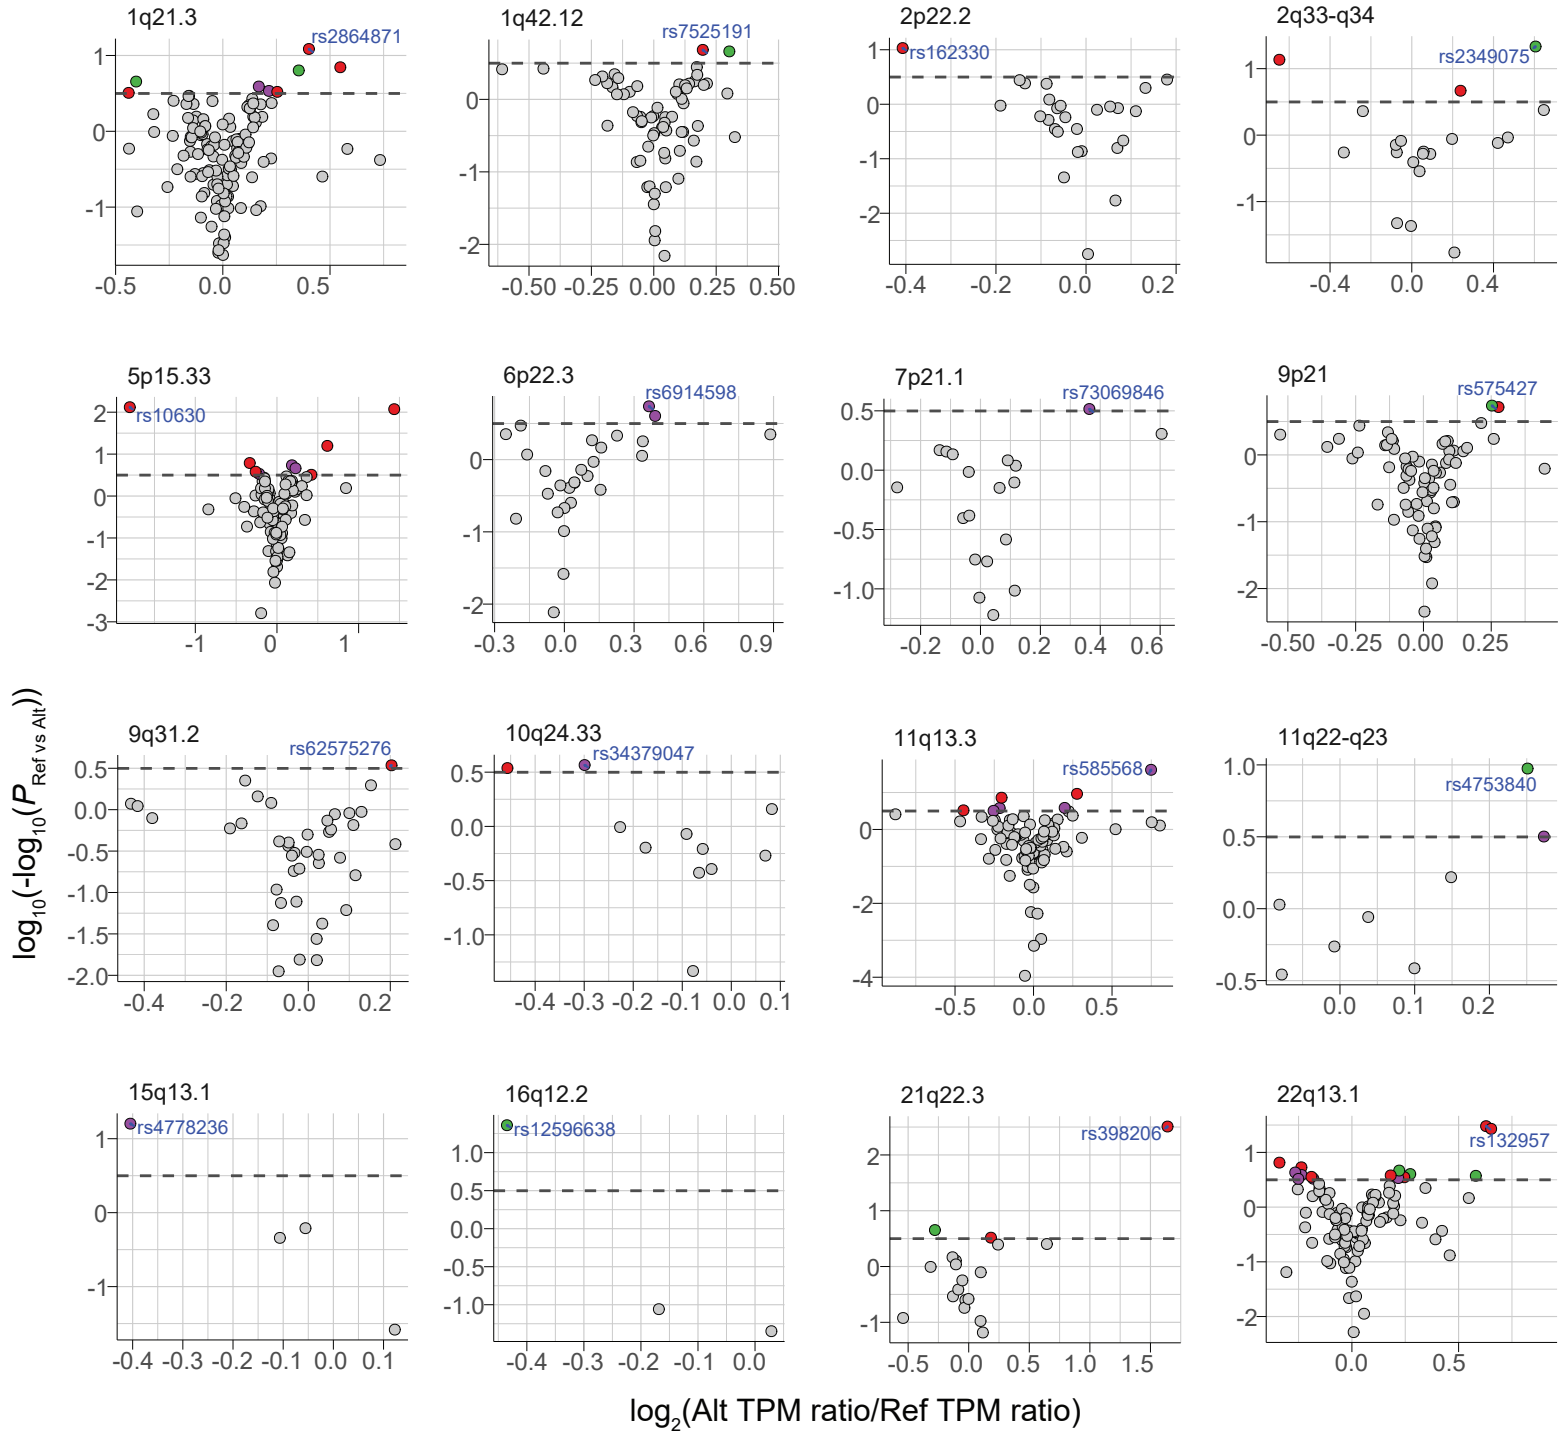

**A**

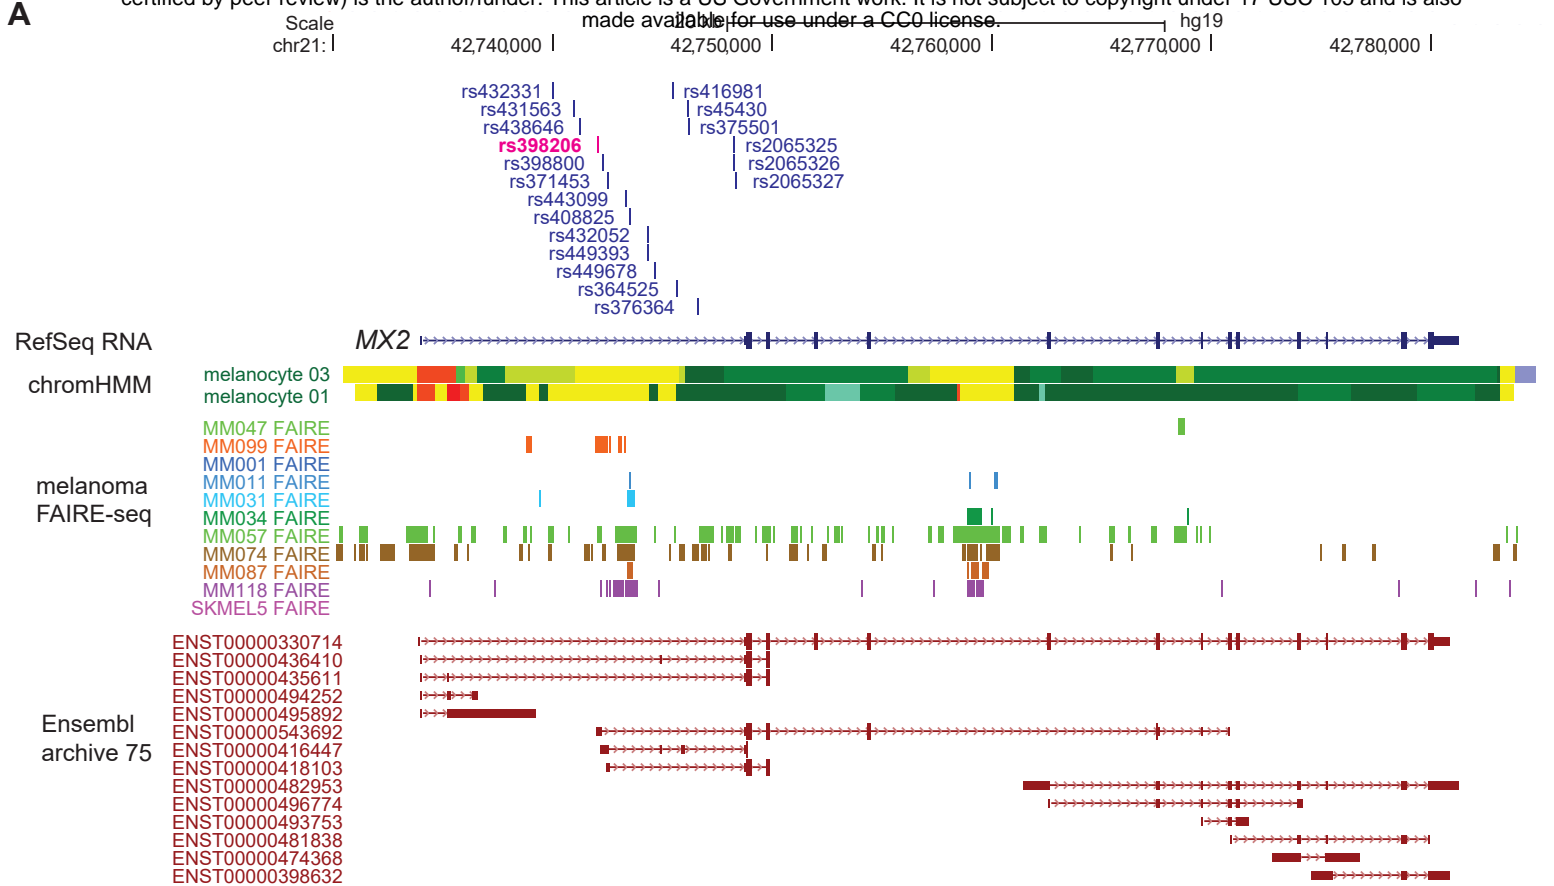

**B**

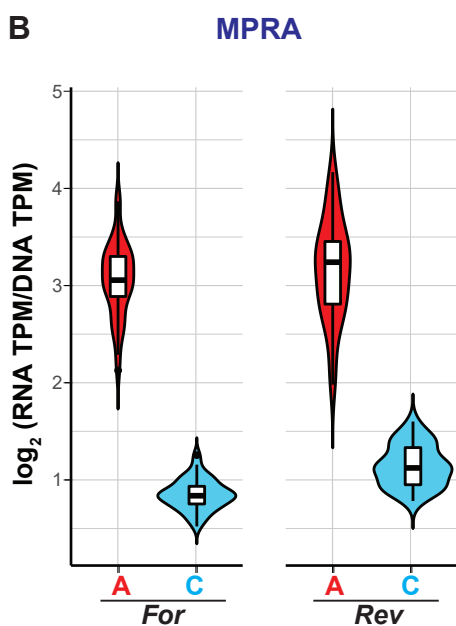

**C**

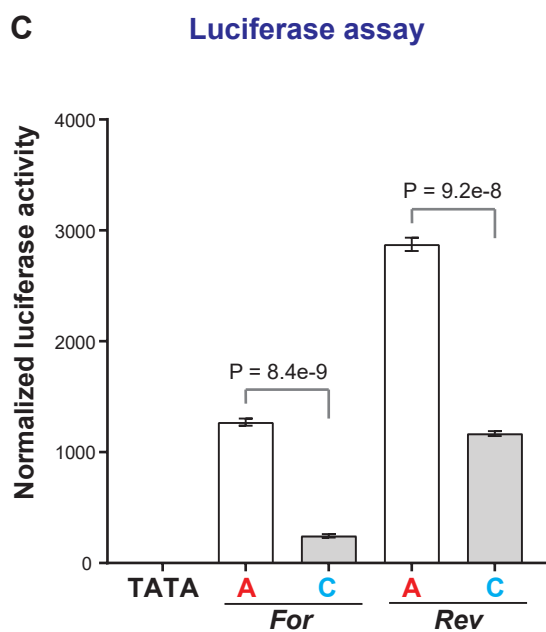

**D**

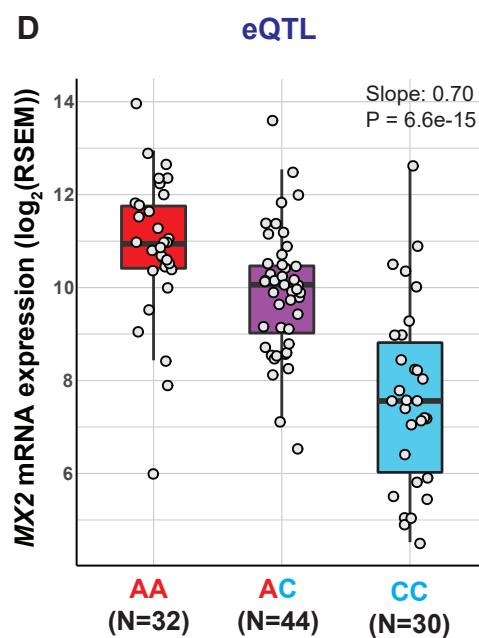

rs398206: Risk (A) Protective (C)

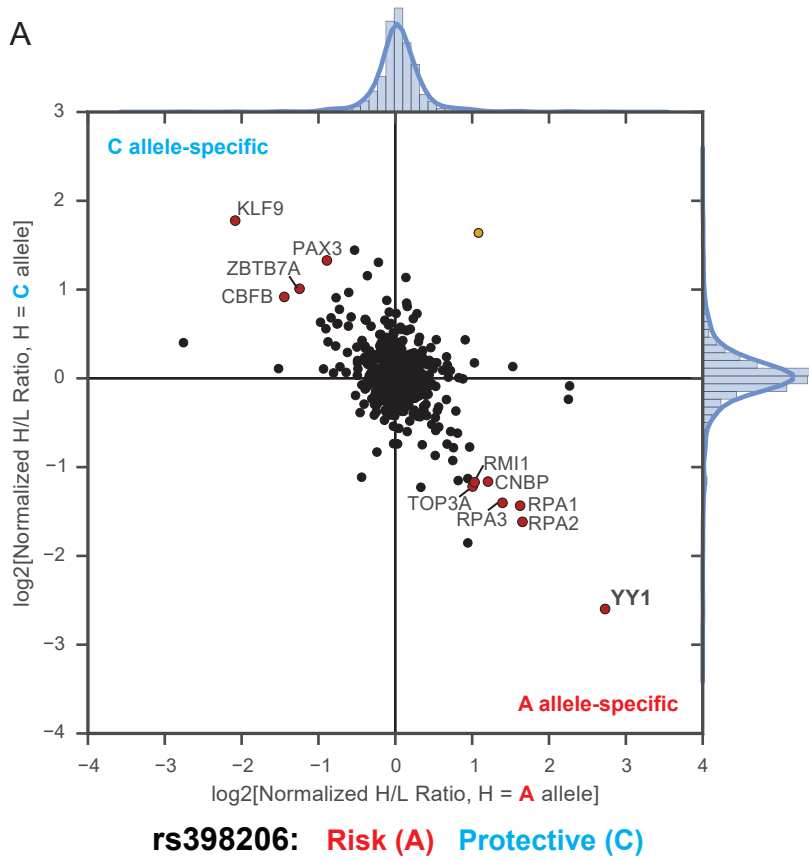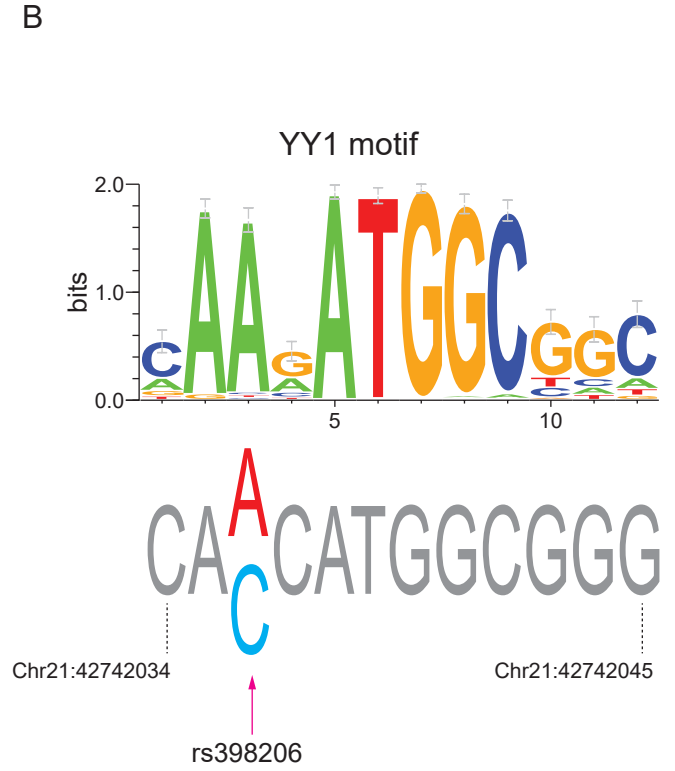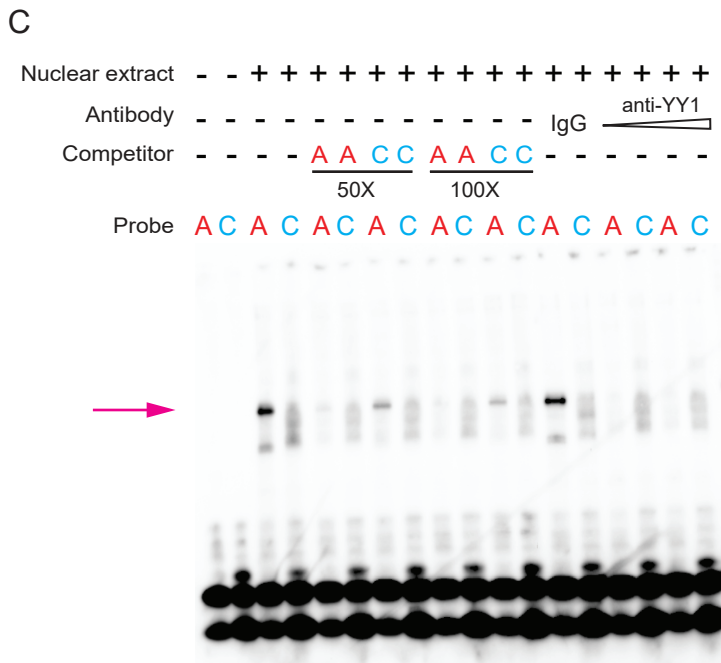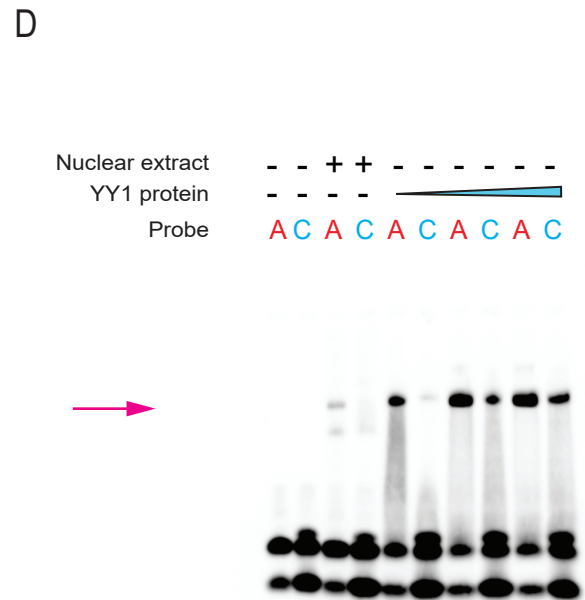

**A**

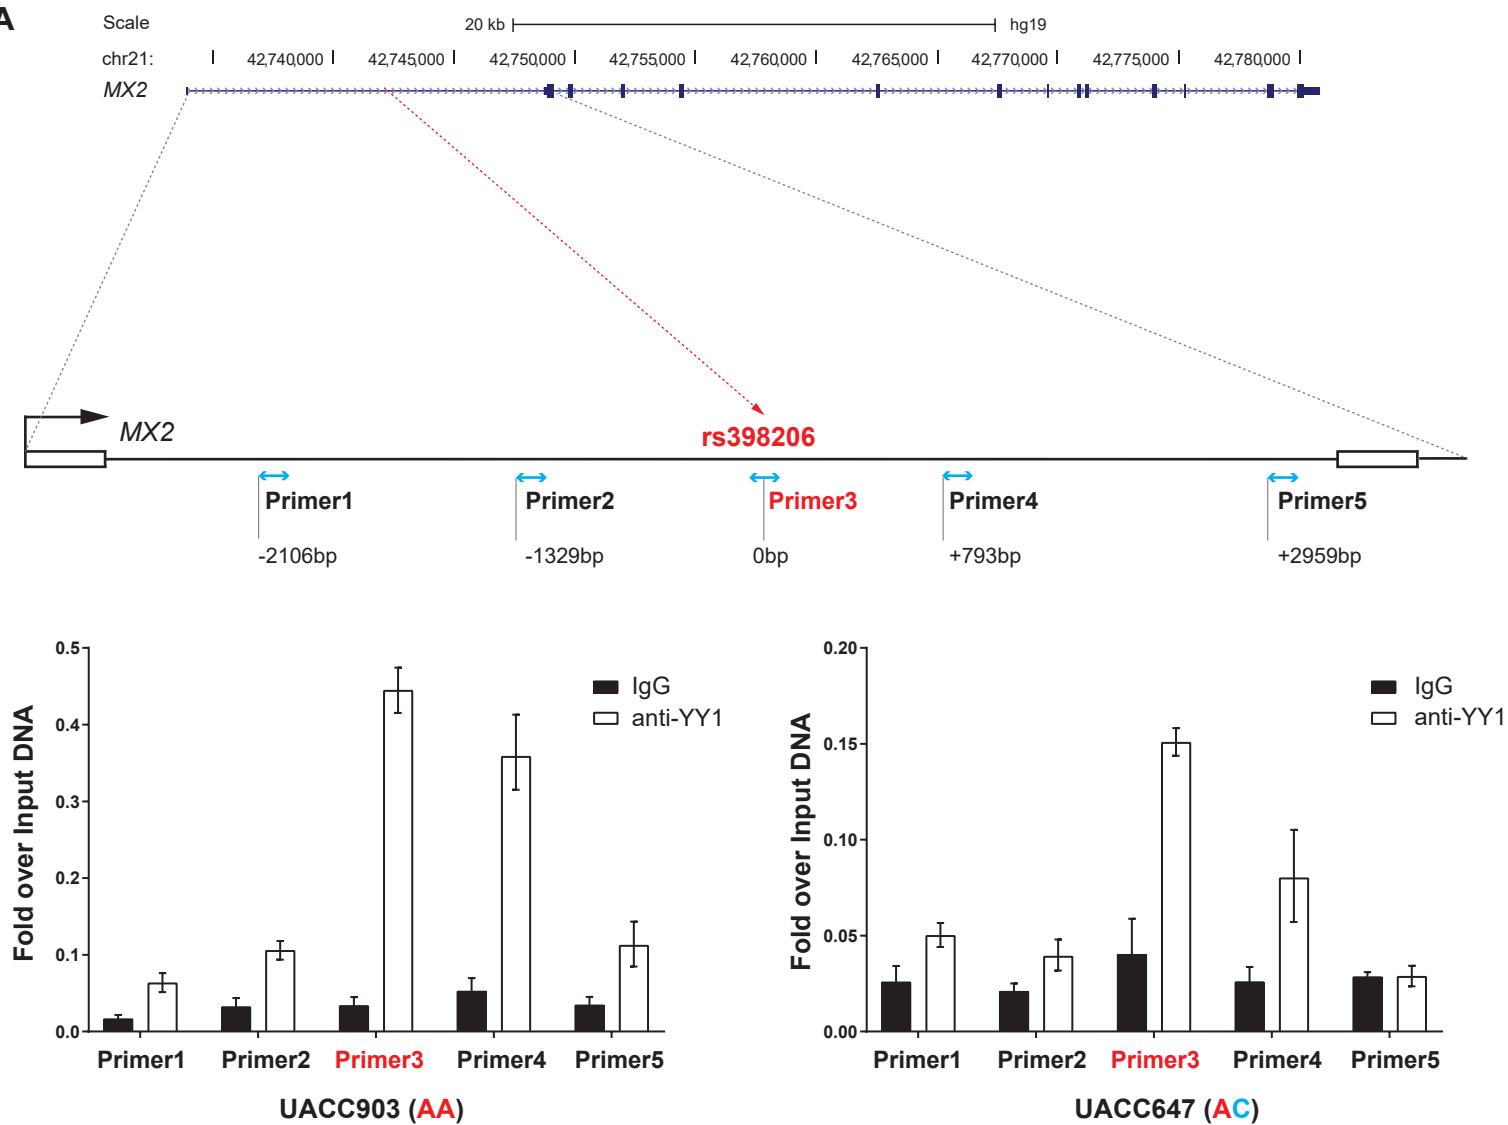

**B**

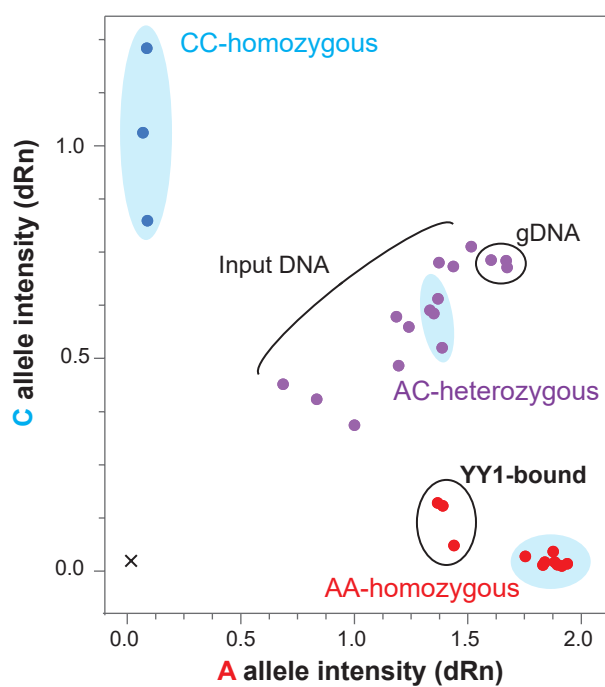

**C**

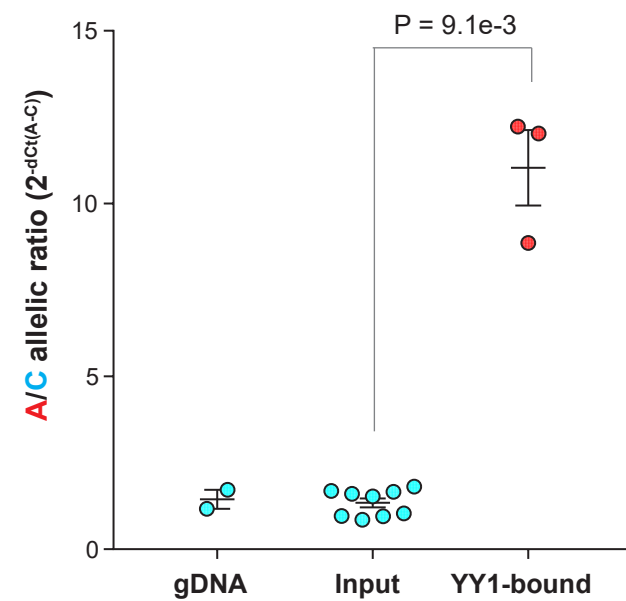

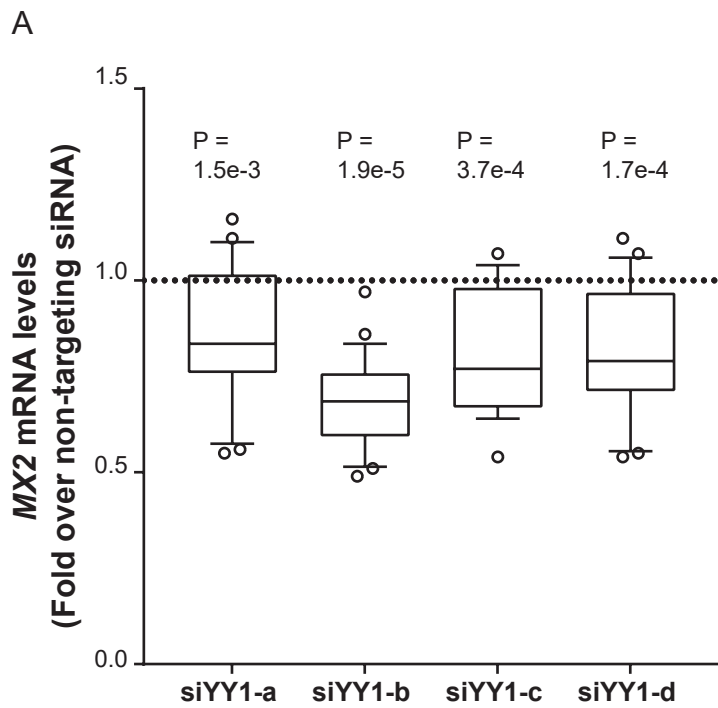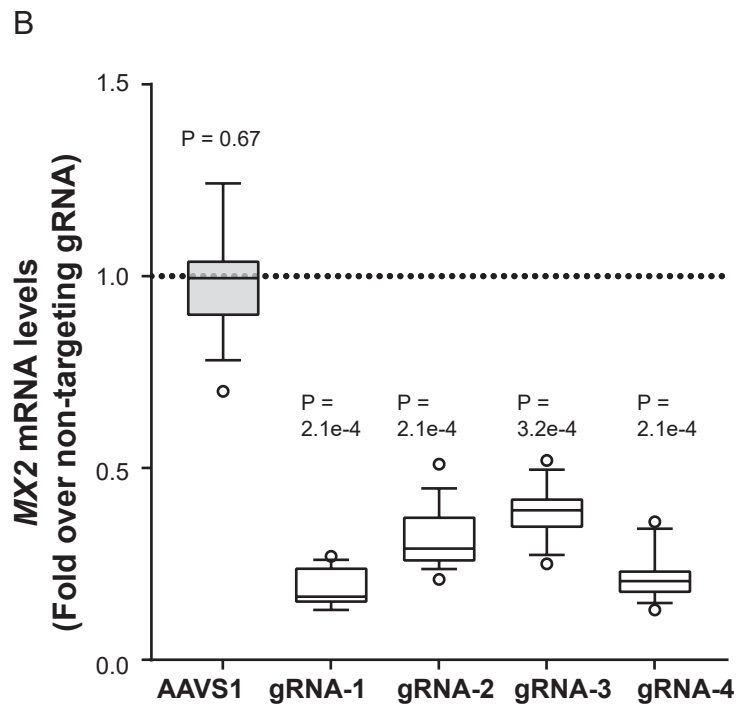



A

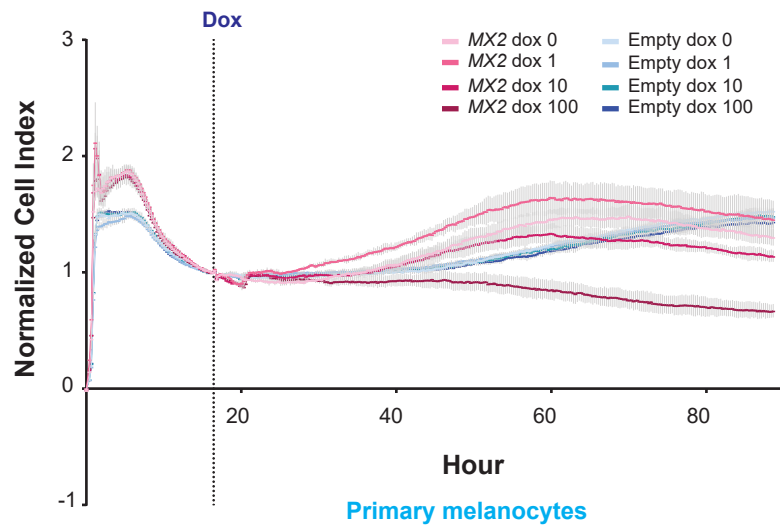

B

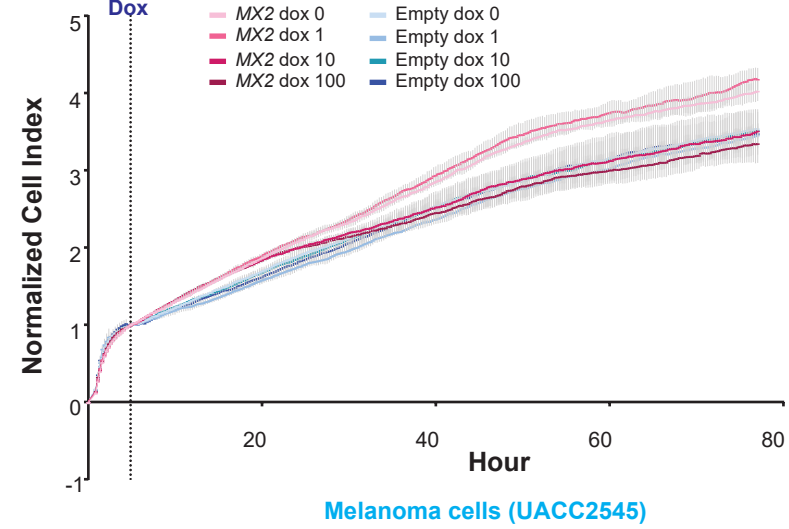

C

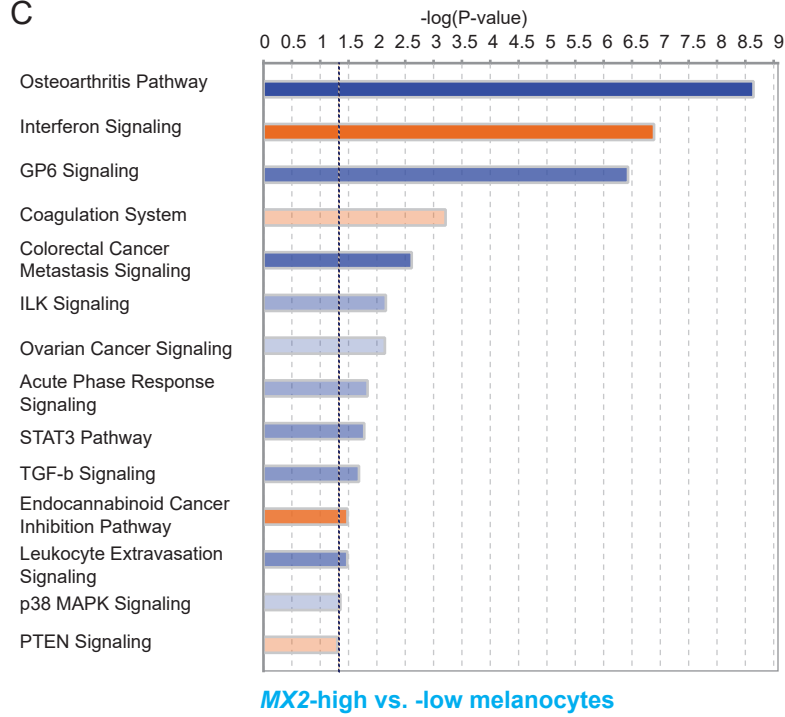

D

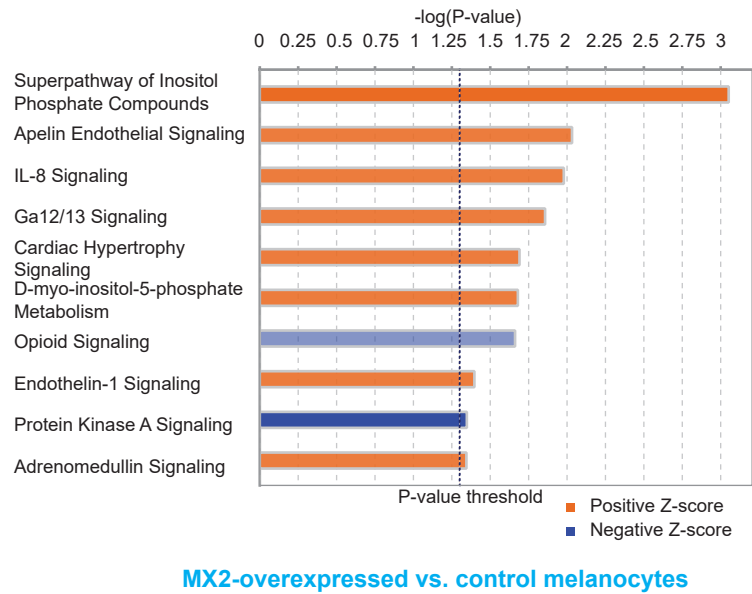

E

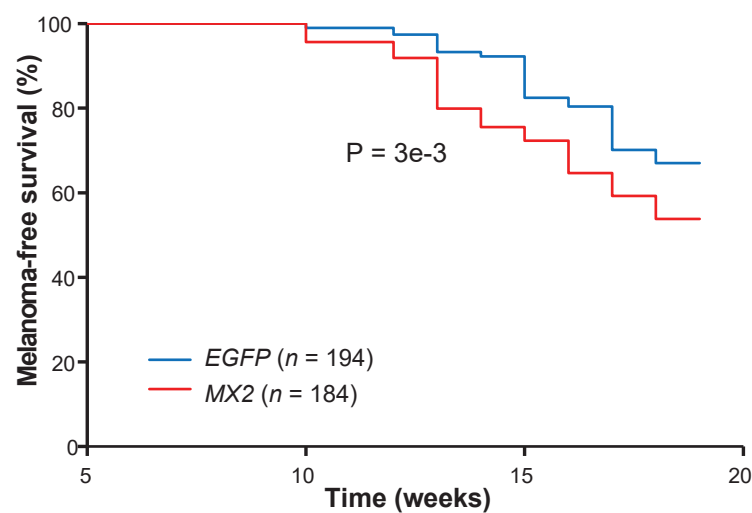

## Supplementary Material

### Splice-QTL analyses of *MX2*

For sQTL we used LeafCutter<sup>1</sup> to assess splice junction-level QTL focusing on alternative intron exclusion and exon joining within a shared cluster as opposed to estimated isoform-levels. sQTL initially indicated that rs398206 was associated with an alternative intron excision of *MX2* in primary melanocytes in the opposite direction of *MX2* eQTL ( $P = 7.79e-7$ , slope = -0.53; **Supplementary Fig 11A-B**). To seek additional support of this observation in other tissue types, we performed sQTL analysis in 44 GTEx tissue types. In 21 tissue types including blood, testis, ovary, and fibroblasts, the same pattern of significant sQTLs were observed for rs398206 or correlated SNPs (lowest  $D'$  = 0.87, EUR), where the protective, C allele favors an alternative junction usage producing an alternative *MX2* transcript (ENST00000418103). Moreover, in 10 tissue types, this sQTL was reciprocated by risk, A allele favoring the junction usage producing the full-length transcript (ENST00000330714), raising a potential hypothesis of alternative promoter usage of *MX2* in these tissue types. Thorough inspection of raw data in melanocytes, however, indicated that the finding was driven by the junction reads of low coverage (i.e. < 4% of the samples showed three or more reads mapped to the junction spanning Chr21:42742322:42748763) (**Supplementary Fig 11C-F**). Since this junction in melanocytes was not mapped to the reference genome (Ensembl75), nor was it detected in PacBio long-read sequencing (data not shown), we performed isoform-specific qPCR of two other *MX2* alternative transcript isoforms (ENST00000543692 and ENST00000418103), which are predicted to use similar junctions. The results for both isoforms displayed similar expression patterns to that of the full-length isoform (ENST00000330714) relative to rs398206 genotypes, suggesting that sQTL finding was false-positive (**Supplementary Fig 11C-F**). Together these data suggest the main effect of *MX2* eQTL in melanocytes was not driven by alternative isoforms or splicing events.

### *MX2* and immune infiltrates in melanomas

To explore the possibility that *MX2* plays its roles mainly through immune response during melanomagenesis, we also asked if *MX2* levels are correlated with immune cell infiltration in TCGA melanoma samples. Using cell type deconvolution programs, TIMER<sup>2</sup> and CIBERSORT<sup>3</sup>, we observed weak correlations between *MX2* levels and infiltration of CD4+ T cells, neutrophils and dendritic cells among 6 cell type models (TIMER; purity-corrected partial Pearson correlation  $r = 0.221, 0.279, 0.273$ , and  $P = 2.36e-6, 1.68e-9, 4.31e-9$ , respectively; **Supplementary Fig 17A**). When we examined correlations with proportions of 22 types of immune cells established by CIBERSORT, we did not observe a significant correlation with *MX2* levels (data not shown). Instead, weak correlations between melanoma-associated rs398206 A allele count and fractions of Macrophage M1 and M2 were observed (Pearson correlation  $r = 0.204$  and  $0.211$ , and  $P = 0.01$  and  $0.013$ , respectively;  $n = 147$  samples with deconvolution  $P < 0.05$ ; **Supplementary Fig 17B**). Together these data did not provide sufficient evidence that *MX2* roles in melanomagenesis are mainly through its roles in immune cell infiltration to tumor.

## References

1. Li, Y.I. *et al.* Annotation-free quantification of RNA splicing using LeafCutter. *Nat Genet* **50**, 151-158 (2018).
2. Li, T. *et al.* TIMER: A Web Server for Comprehensive Analysis of Tumor-Infiltrating Immune Cells. *Cancer Res* **77**, e108-e110 (2017).
3. Newman, A.M. *et al.* Robust enumeration of cell subsets from tissue expression profiles. *Nat Methods* **12**, 453-7 (2015).
4. Li, B. & Dewey, C.N. RSEM: accurate transcript quantification from RNA-Seq data with or without a reference genome. *BMC Bioinformatics* **12**, 323 (2011).
5. Zhang, C., Zhang, B., Lin, L.-L. & Zhao, S. Evaluation and comparison of computational tools for RNA-seq isoform quantification. *BMC Genomics* **18**, 583 (2017).
6. Weintraub, A.S. *et al.* YY1 Is a Structural Regulator of Enhancer-Promoter Loops. *Cell* **171**, 1573-1588 e28 (2017).

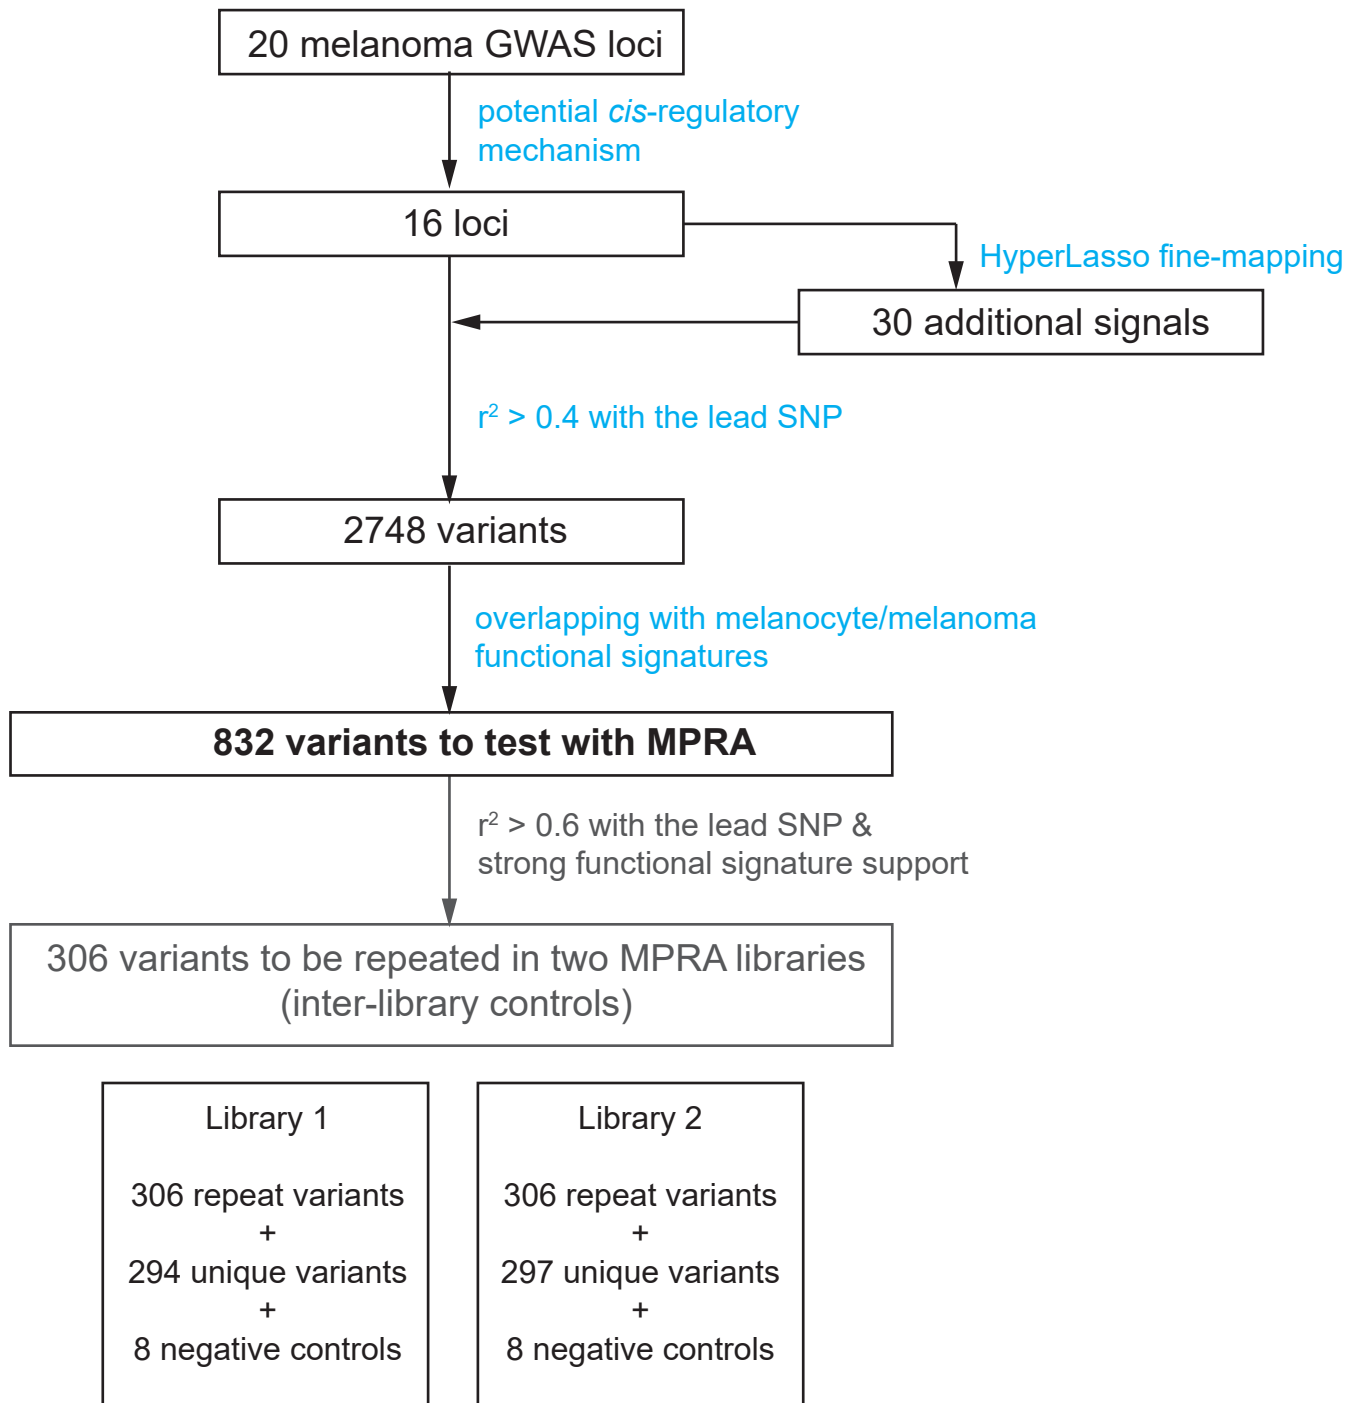

**Supplementary Figure 1** Variant selection from melanoma GWAS loci for MPRA.

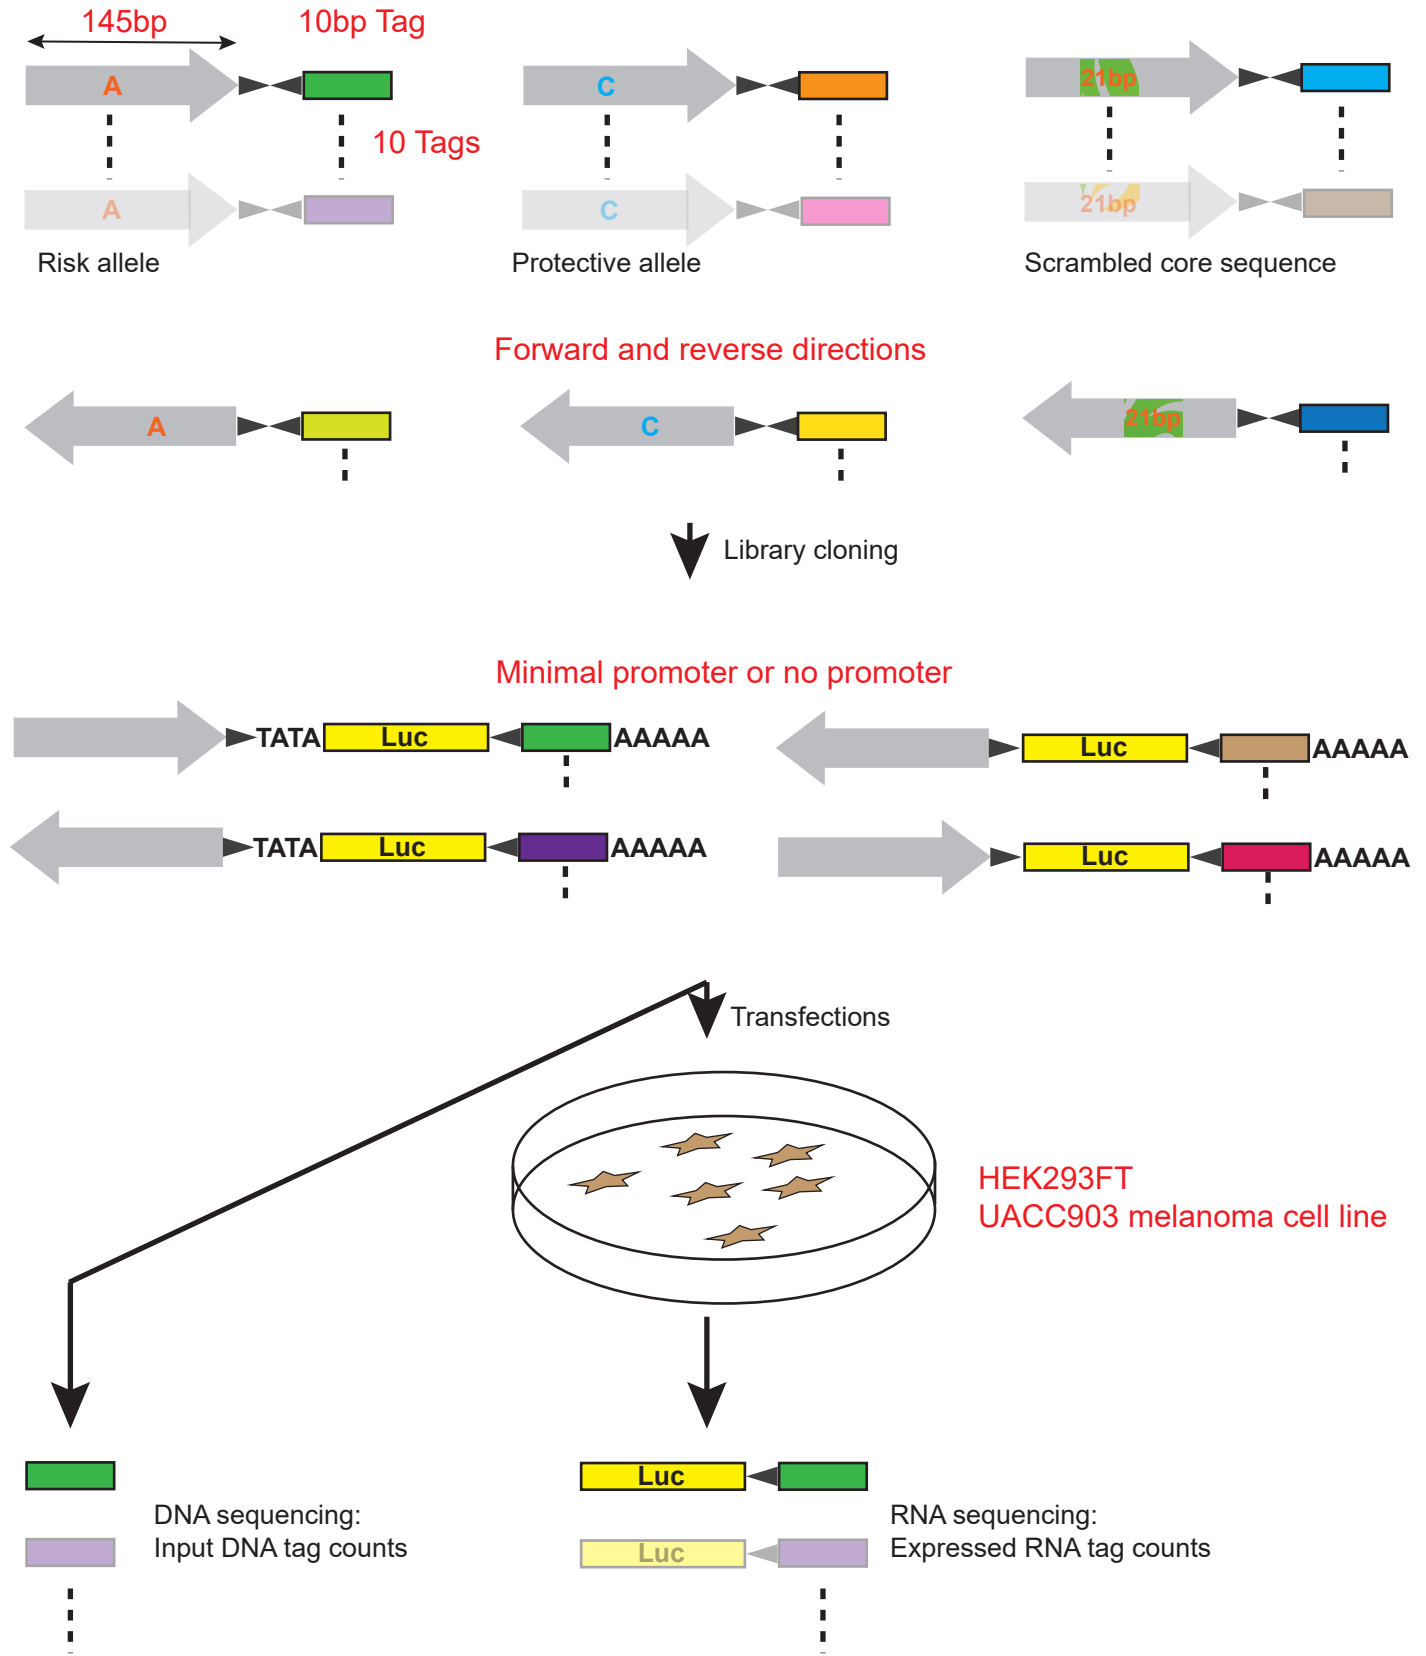

**Supplementary Figure 2** MPRA workflow. Oligo libraries were synthesized using 145bp of sequence encompassing each variant with risk or protective alleles or a scrambled sequence for core 21 bases in both forward and reverse directions, that was flanked by enzyme recognition sites and sequencing primer sequences as well as 10bp barcodes (10 tags per unique sequence). Libraries were cloned into luciferase constructs with or without a minimal TATA promoter. Cloned libraries were then transfected into HEK293FT cells or UACC903 melanoma cells to generate expressed RNA tag libraries. Both input DNA and RNA libraries were sequenced to assess the tag counts associated with the test sequences.



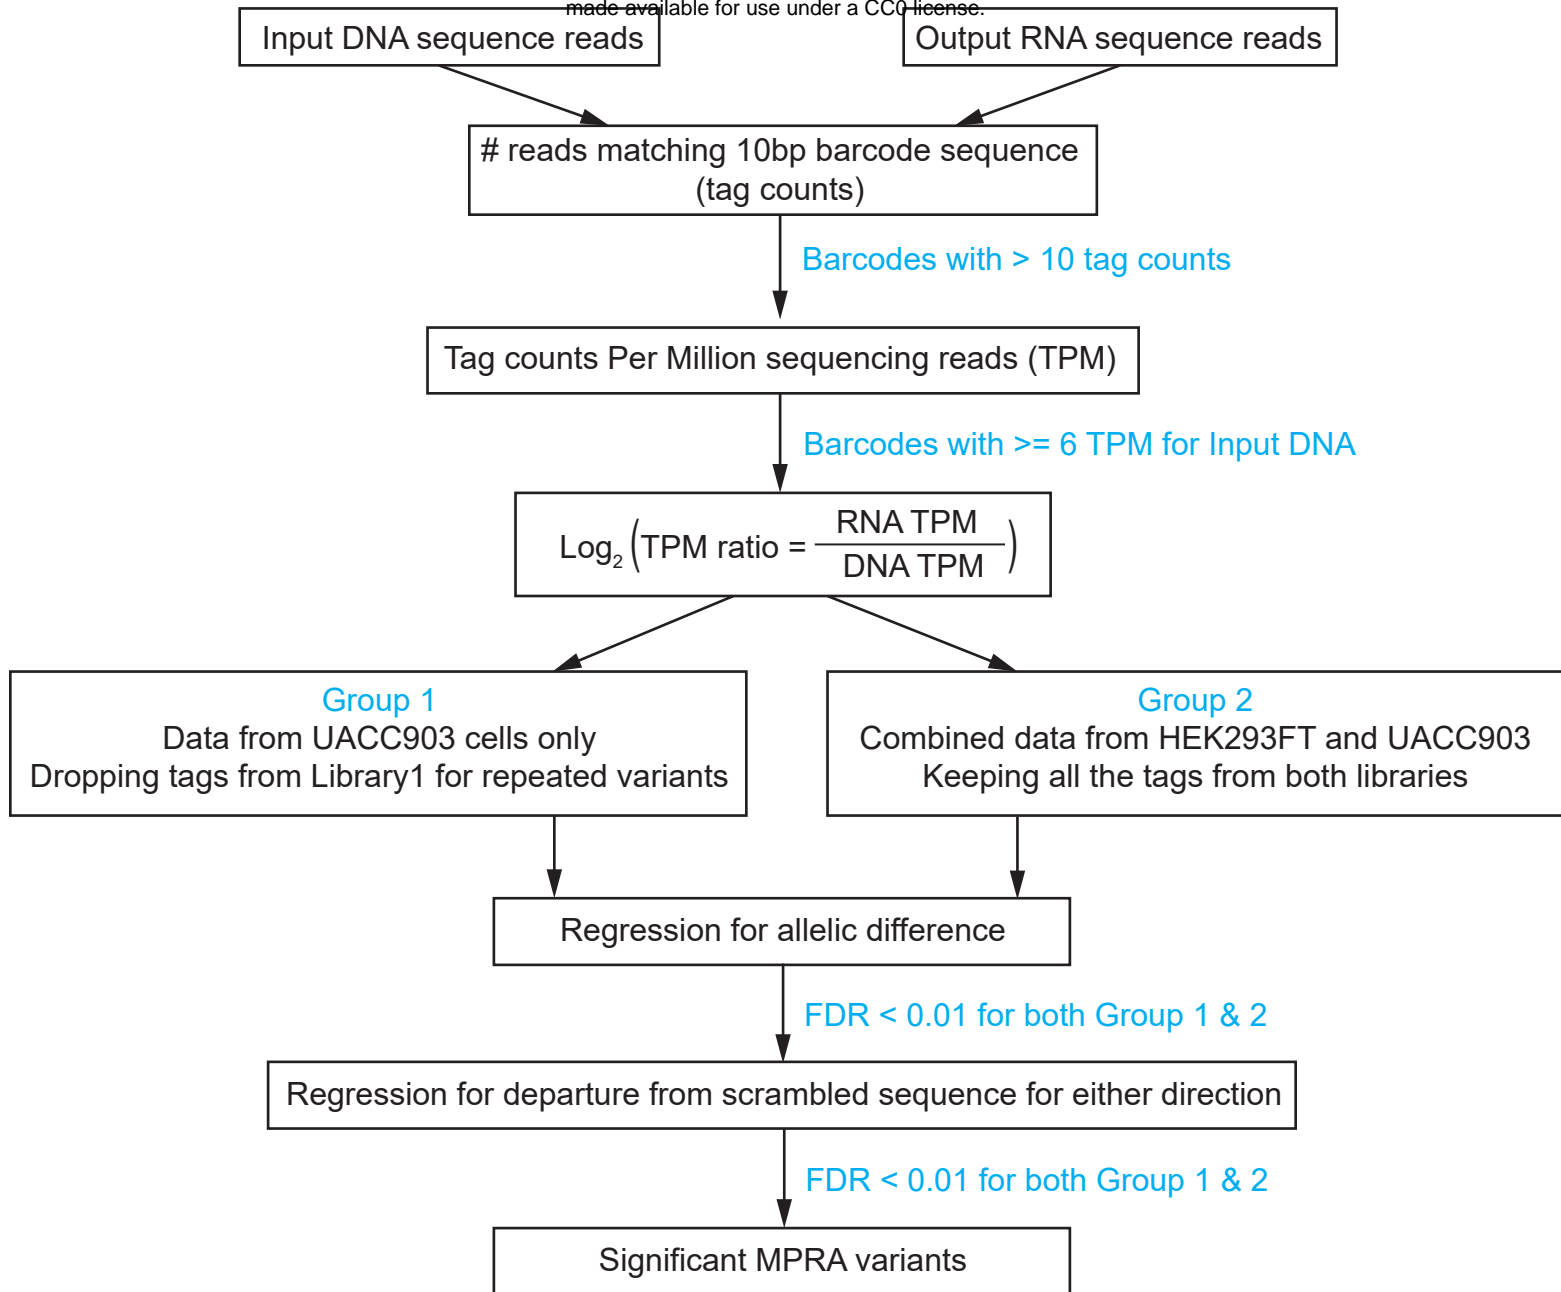

### **Supplementary Figure 3** MPRA data analyses workflow.

Tag count ( $\log_2$ )



**A**

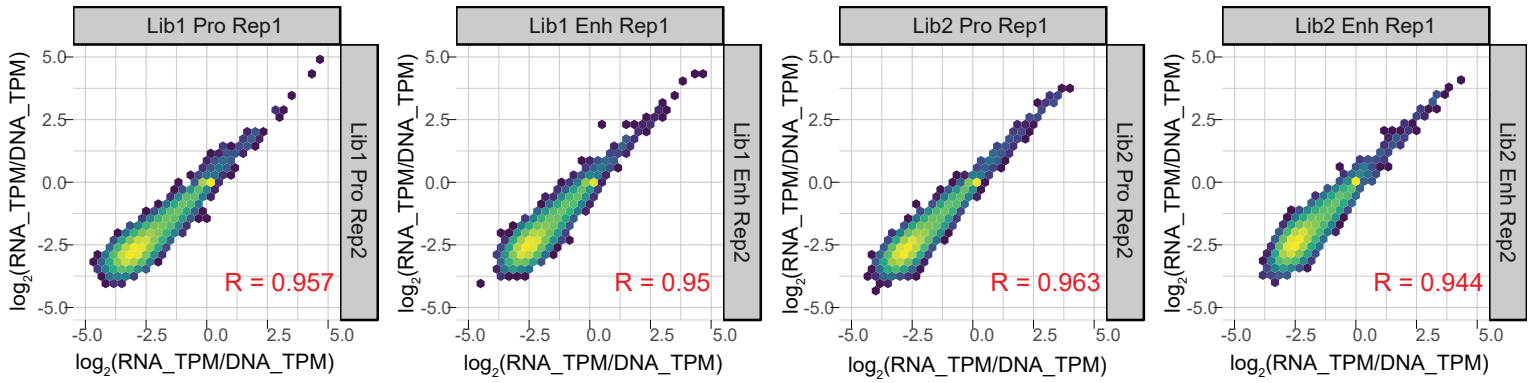

UACC903 transfections

**B**

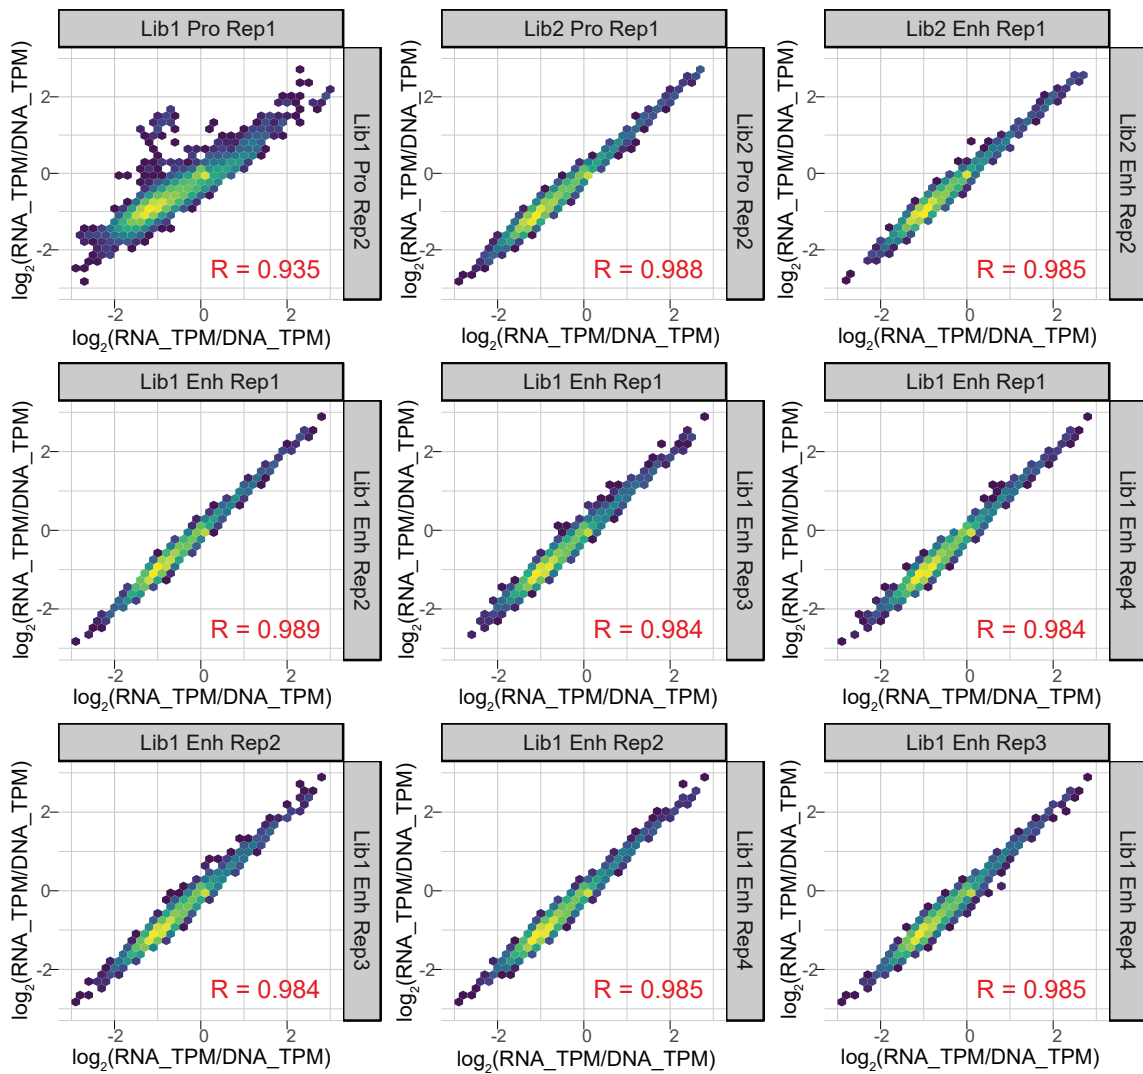

HEK293FT transfections

**Supplementary Figure 4** Inter-transfection correlation of normalized tag counts for each tag between transfection replicates are shown for transfections of UACC903 cells (A) and HEK293FT cells (B).  $\log_2(\text{RNA TPM}/\text{DNA TPM})$  value for each tag before QC are plotted with the normalized tag count shown as color-coded density level. Pair-wise Pearson correlation coefficients are shown in red (R values). Lib1 and 2: Library 1 and 2, Pro: MPRA construct testing promoter function containing no promoter element, Enh: MPRA construct testing enhancer function containing minimal TATA promoter, Rep1 through 4: transfection replicates 1 through 4.

Tag count ( $\log_2$ )

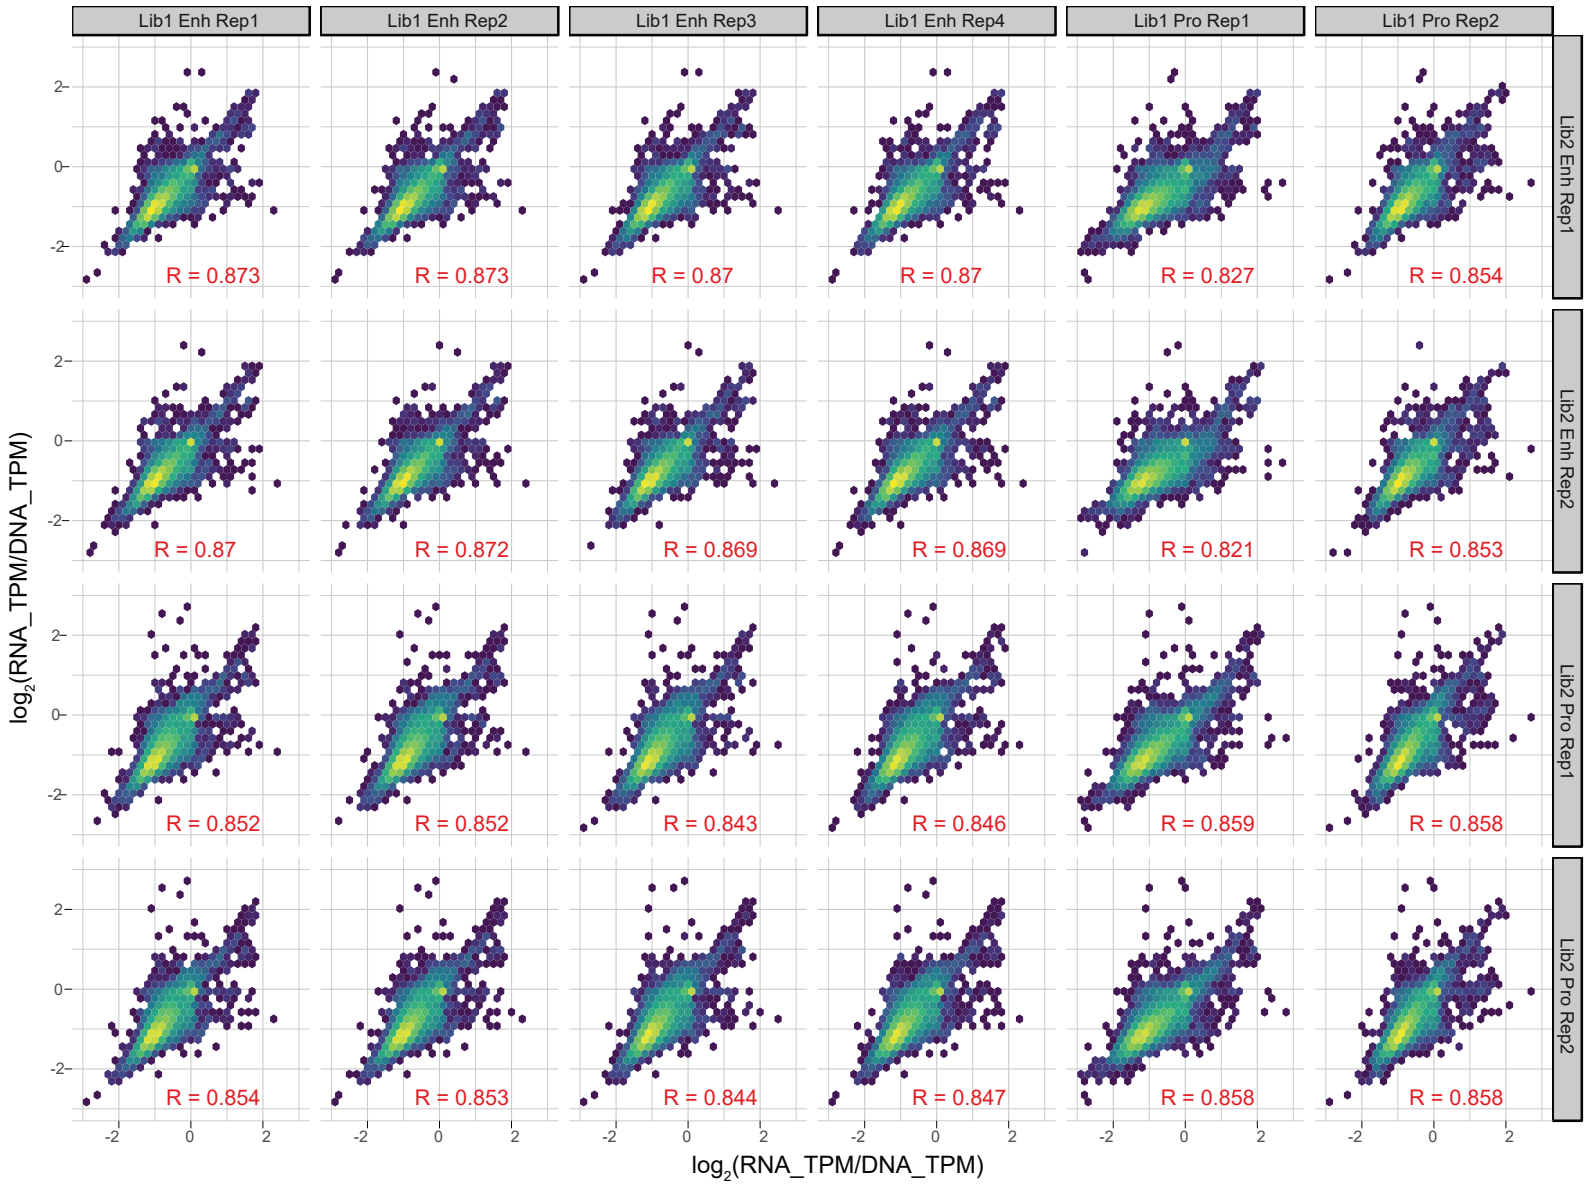

**Supplementary Figure 5** Inter-library correlation of normalized tag counts for tags that were repeated in Library 1 and Library 2 are shown for transfections of HEK293FT cells.  $\log_2(\text{RNA TPM}/\text{DNA TPM})$  value for each tag before QC are plotted with the normalized tag count shown as color-coded density level. Pair-wise Pearson correlation coefficients are shown in red (R values). Lib1 and 2: Library 1 and 2, Pro: MPRA construct testing promoter function containing no promoter element, Enh: MPRA construct testing enhancer function containing minimal TATA promoter, Rep1 and 2: transfection replicates 1 and 2.

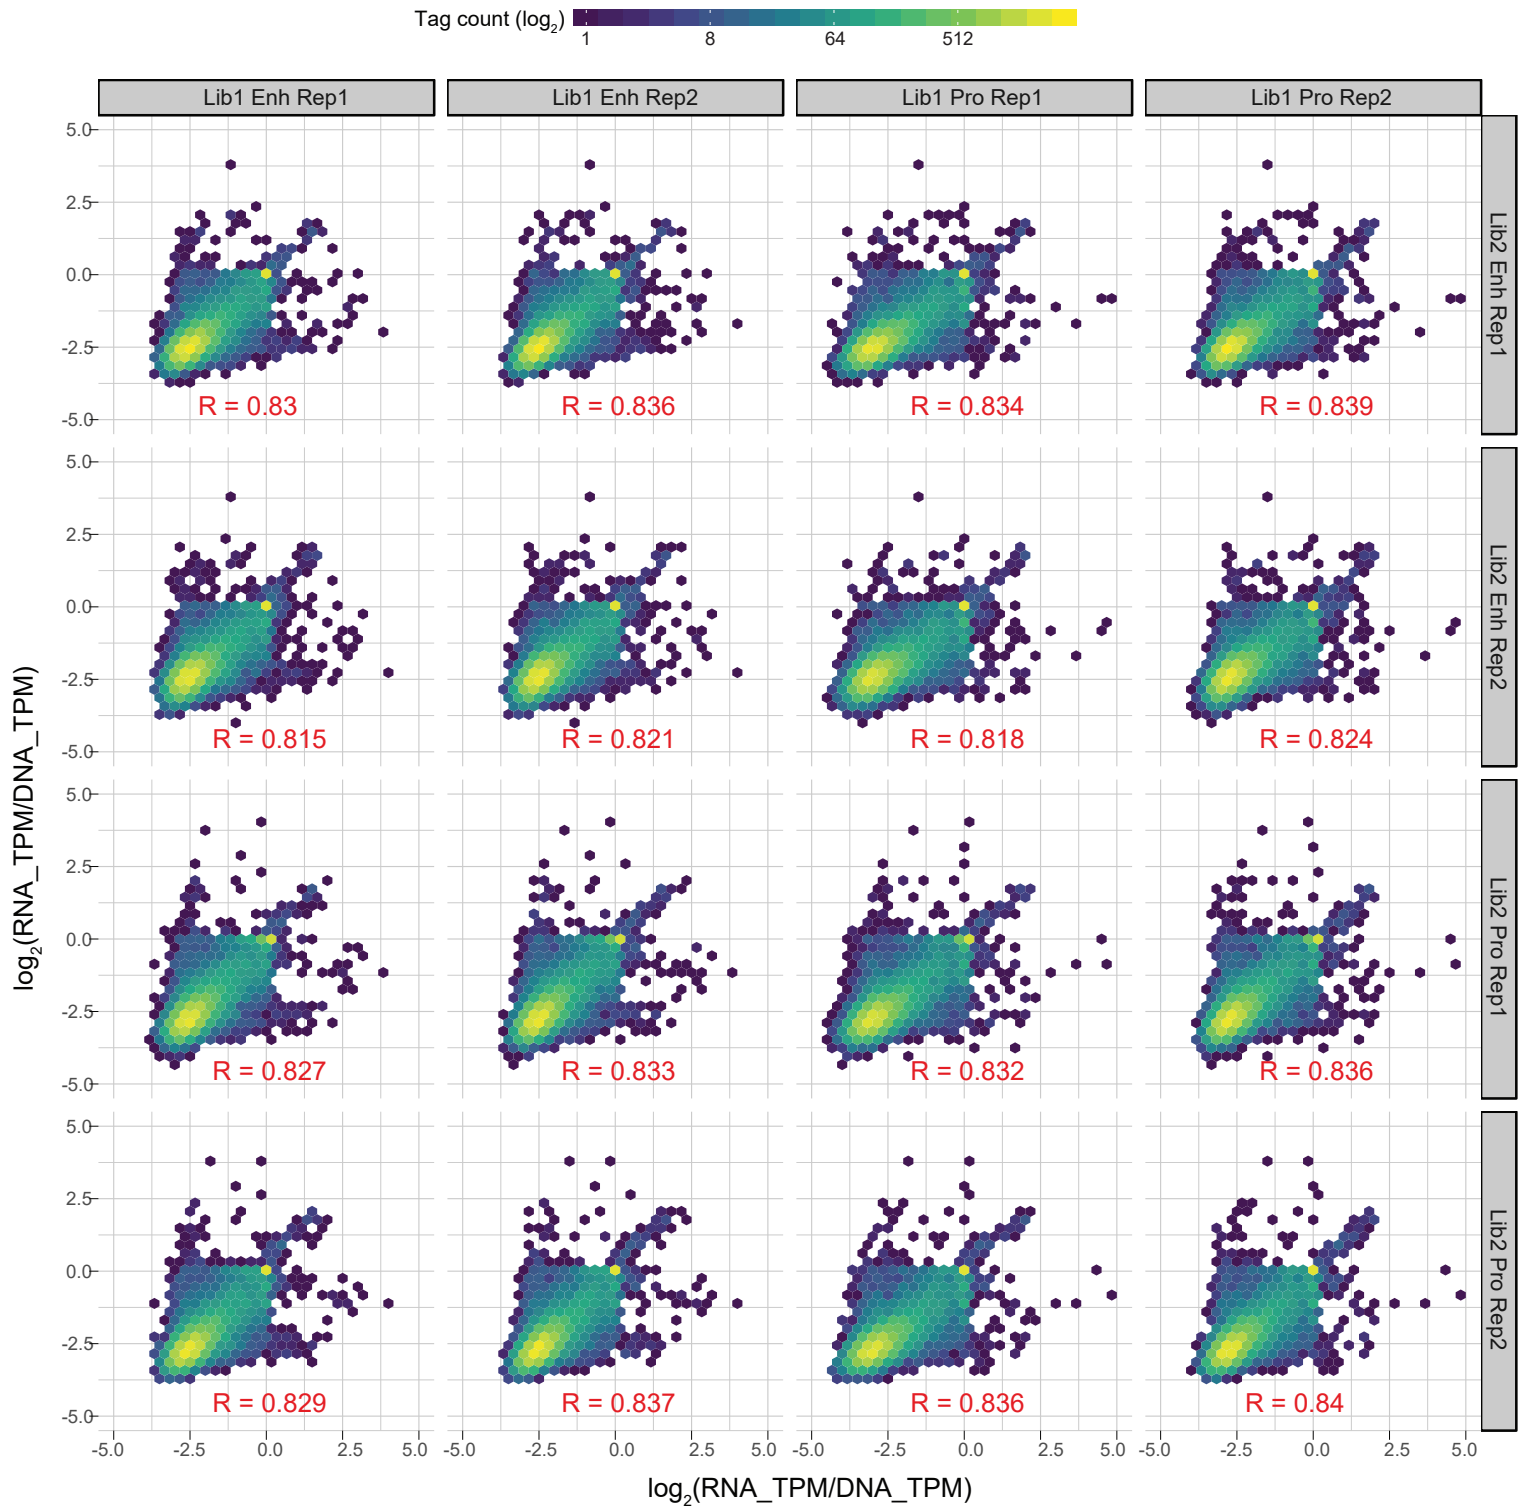

**Supplementary Figure 6** Inter-library correlation of normalized tag counts for tags that were repeated in Library 1 and Library 2 are shown for transfections of UACC903 cells.  $\log_2(\text{RNA TPM}/\text{DNA TPM})$  value for each tag before QC are plotted with the normalized tag count shown as color-coded density level. Pair-wise Pearson correlation coefficient are shown in red (R values). Lib1 and 2: Library 1 and 2, Pro: MPRA construct testing promoter function containing no promoter element, Enh: MPRA construct testing enhancer function containing minimal TATA promoter, Rep1 and 2: transfection replicates 1 and 2.



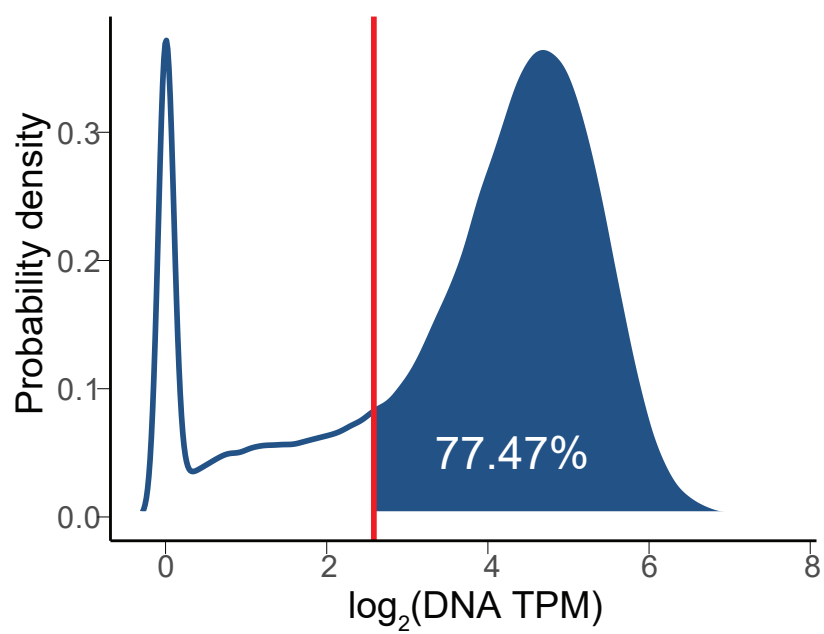

**Supplementary Figure 7** Tag count distribution in the input DNA libraries are shown as  $\log_2$  (DNA TPM) density. Red line denotes  $\log_2$  (DNA TPM)  $\sim 2.58$  or DNA TPM = 6, which was used as a QC cutoff. Percentage of tags with DNA TPM  $\geq 6$  are 77.47% of all the detected tags.

A

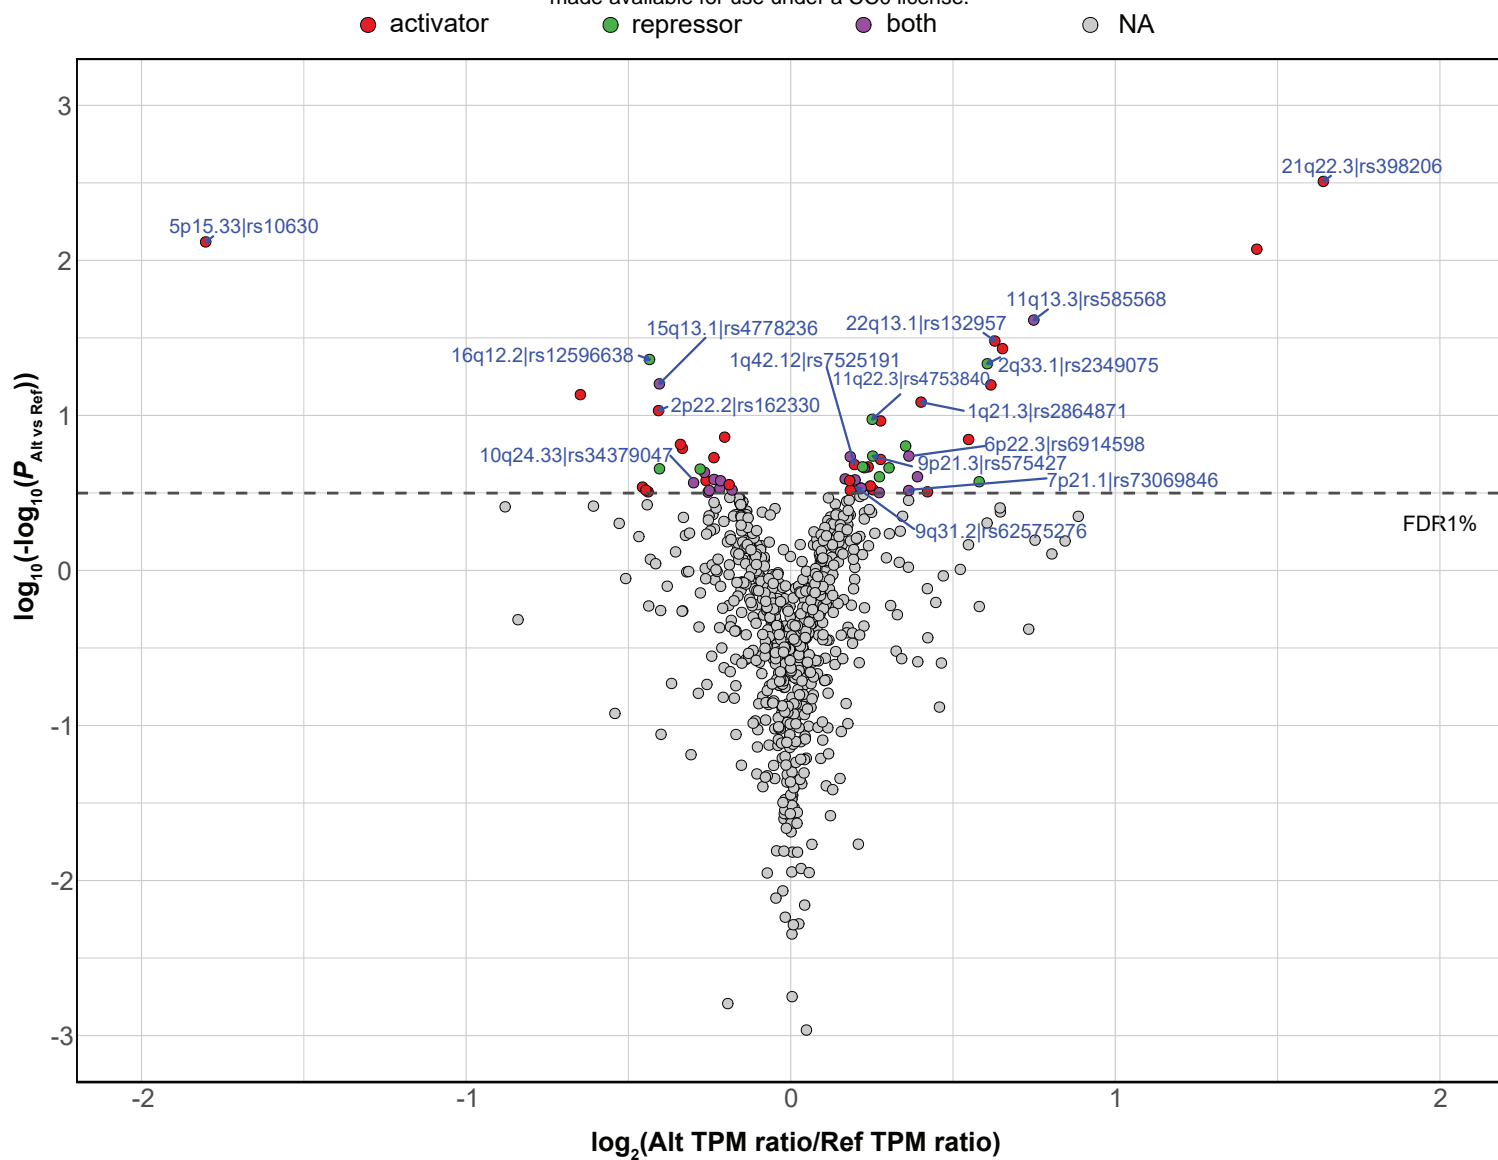

B

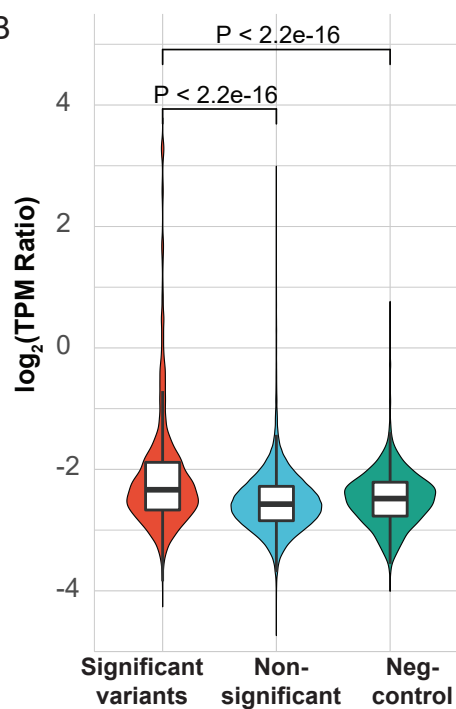

**Supplementary Figure 8** MPRA results from all 16 melanoma loci (A) Melanoma GWAS variants were plotted for their inverted regression P-values of allelic transcriptional difference in UACC903 melanoma cells. Allelic effect size is shown on the X-axis as log-transformed allelic fold difference using the ratio of RNA TPM over DNA TPM (TPM ratio). Putative function of significant MPRA variants are shown as activator, repressor, or both (expression levels of either allele is higher, lower, or higher and lower than those of scrambled sequence). Chromosome band and SNP ID are shown for the variant displaying the lowest FDR from each locus. (B) Transcriptional activity was shown as log-transformed RNA TPM over DNA TPM (TPM ratio) for 39 significant variants (FDR < 0.01), non-significant (the rest of tested variants), and negative controls (8 variants) using data from UACC903 cells. Mann-Whitney U test.

●  $r^2 > 0.8$  with primary GWAS peak SNP    ●  $r^2 > 0.8$  with secondary GWAS peak SNP    ○  $r^2 < 0.8$

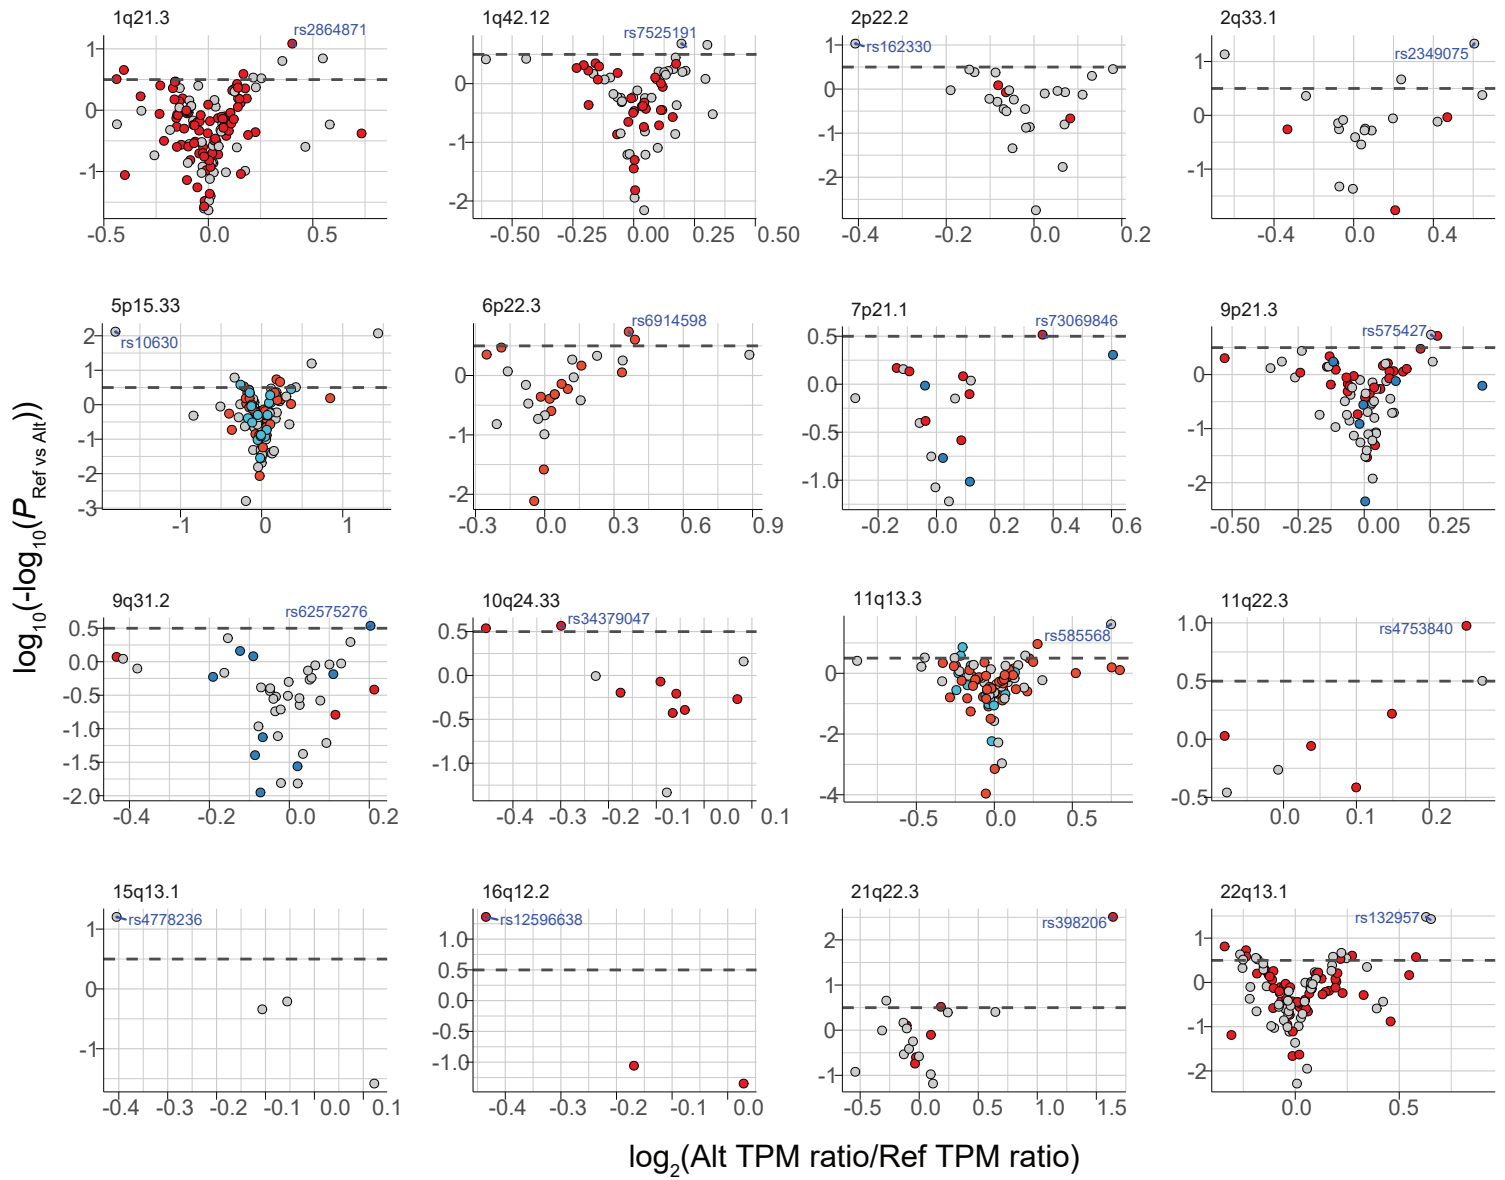

**Supplementary Figure 9** Volcano plots of MPRA results for each melanoma GWAS locus presented based on  $r^2$  with the primary or secondary GWAS peak SNP of each locus.

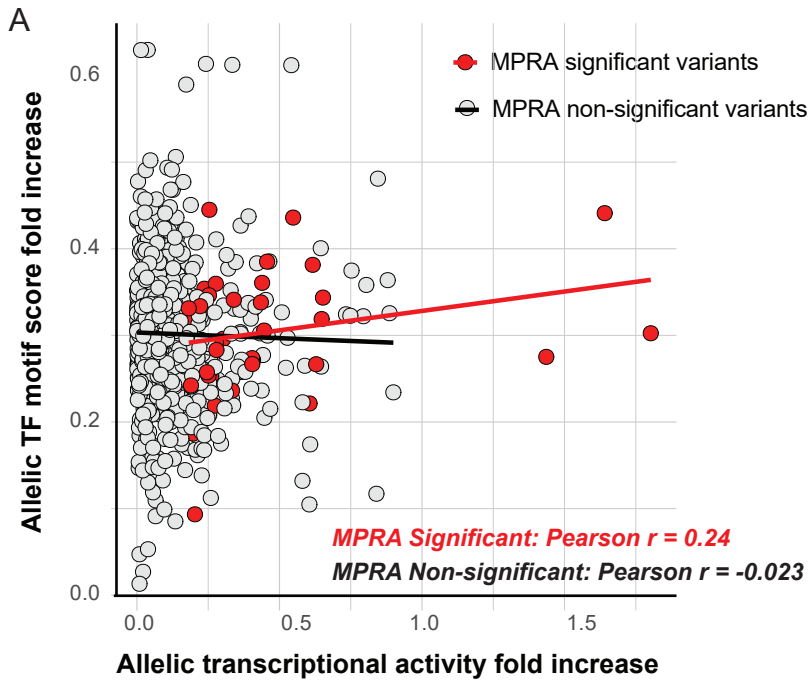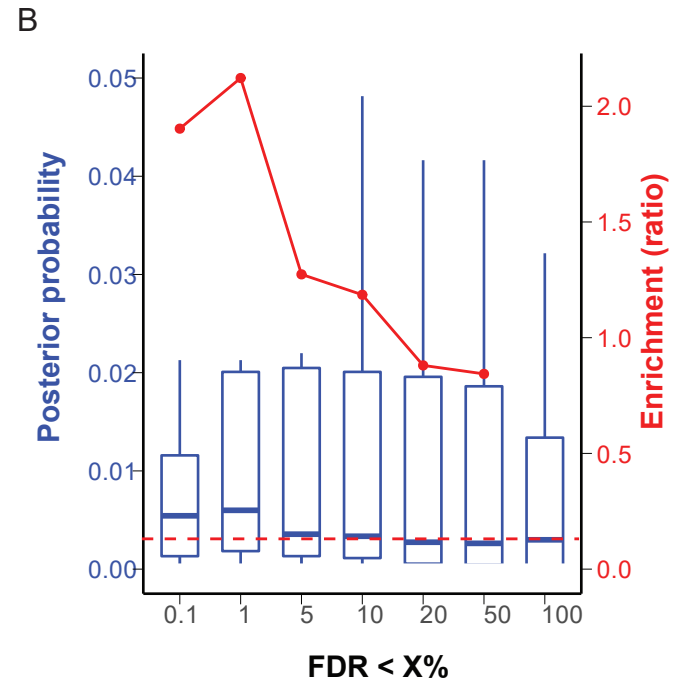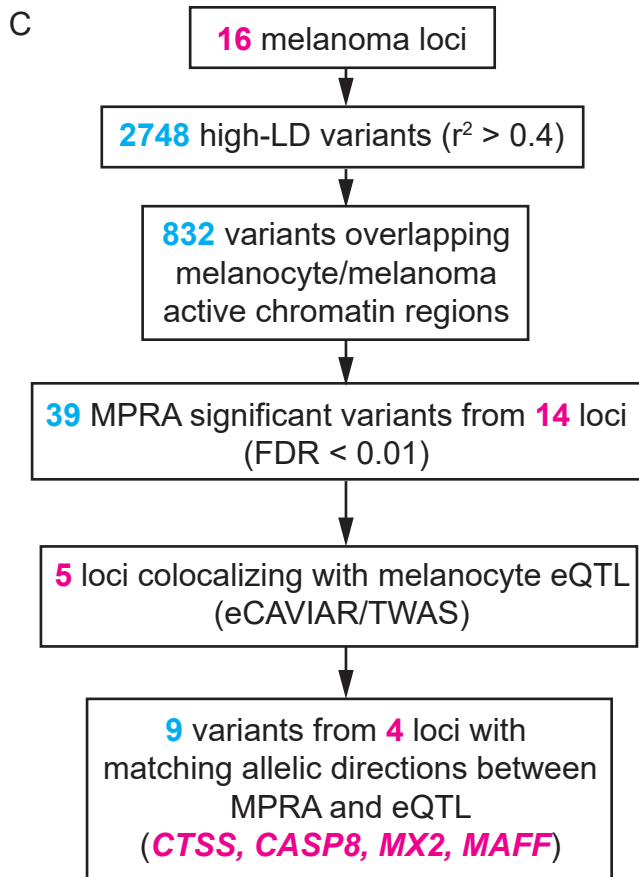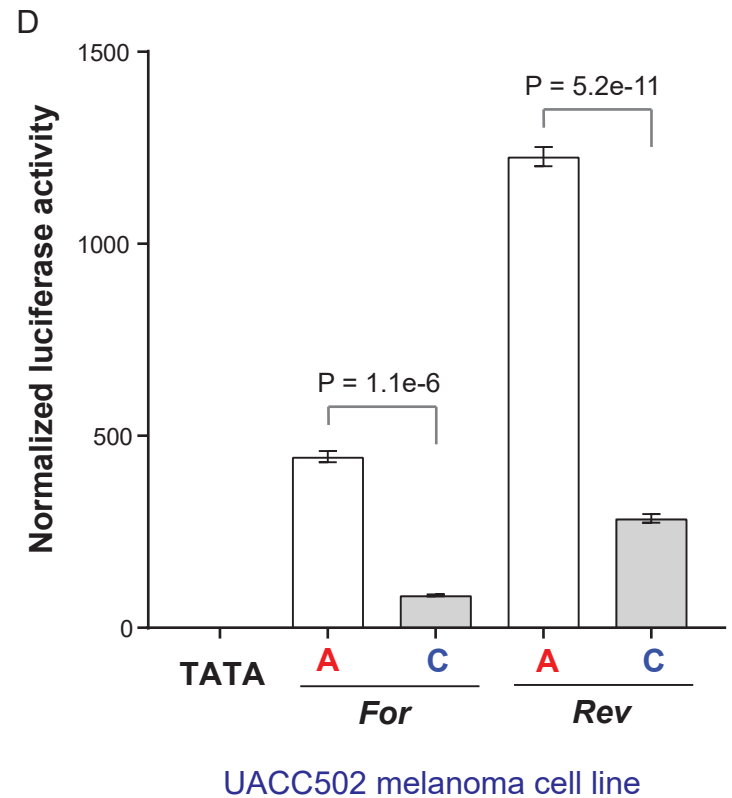

**Supplementary Figure 10** (A) Allelic transcriptional activity fold increase (relative to the allele with lower activity) from MPRA was plotted against allelic fold increase of transcription factor binding motif score (relative to the allele with lower score) for 39 MPRA-significant variants (FDR < 0.01) and non-significant variants. Fold changes in both axes are  $\log_2$ -transformed. The scores for the most significant TF for each variant was used (TF motif prediction  $P < 0.001$ ). Pearson correlation  $r$  scores for each group are shown.  $P = 0.149$  for significant variants, and  $P = 0.556$  for non-significant variants. (B) Posterior probabilities (left Y-axis in blue) of MPRA variants are plotted for subsets of variants with increasing FDR cutoffs (median, 25<sup>th</sup> and 75<sup>th</sup> percentile). Red dashed line indicates the median probability score when including up to FDR = 100%. Enrichment ratios of median posterior probability score from each subset over that of FDR = 100% group are shown as dots and a trend line on the right Y-axis in red. (C) A flowchart of variant prioritization using melanocyte eQTL. (D) Individual luciferase activity assays of 145bp sequences encompassing rs398206 is shown for UACC502. pGL4.23 construct including minimal TATA promoter was used. One representative set is shown from three biological replicates. Mean with SEM,  $n = 6$ . All constructs are significantly higher than pGL4.23 (TATA) control ( $P < 0.0001$ ). Two-tailed, unpaired t-test assuming unequal variance.



**A**

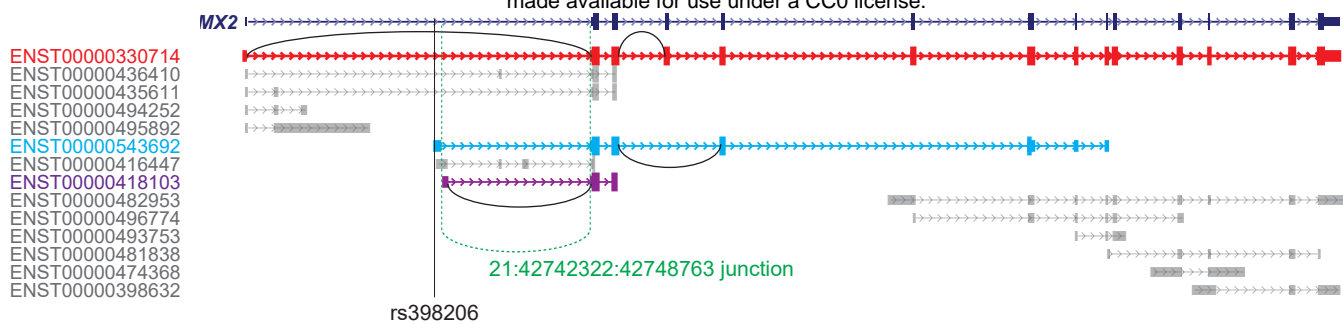

**B**

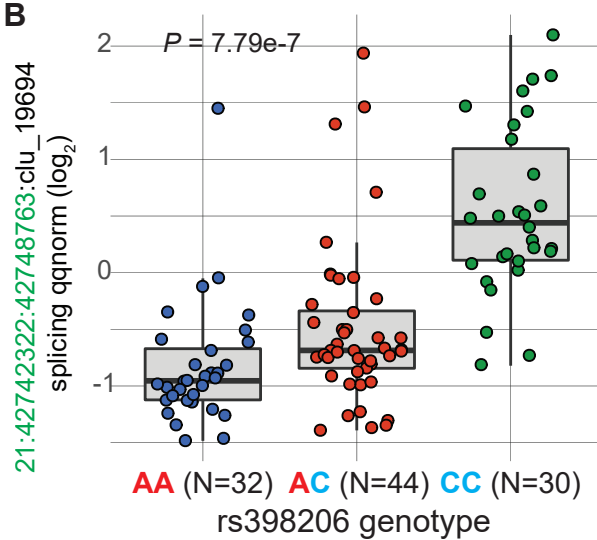

**C**

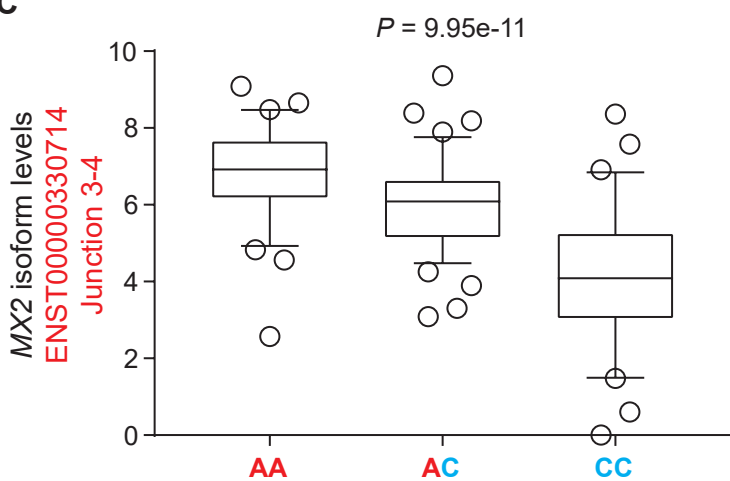

**D**

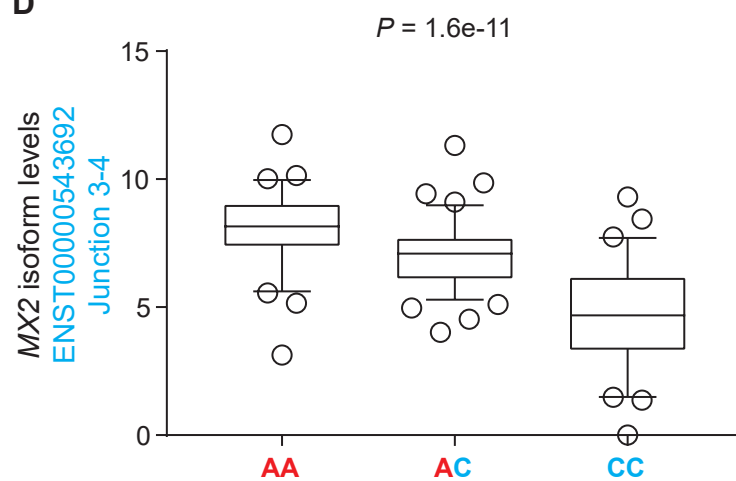

**E**

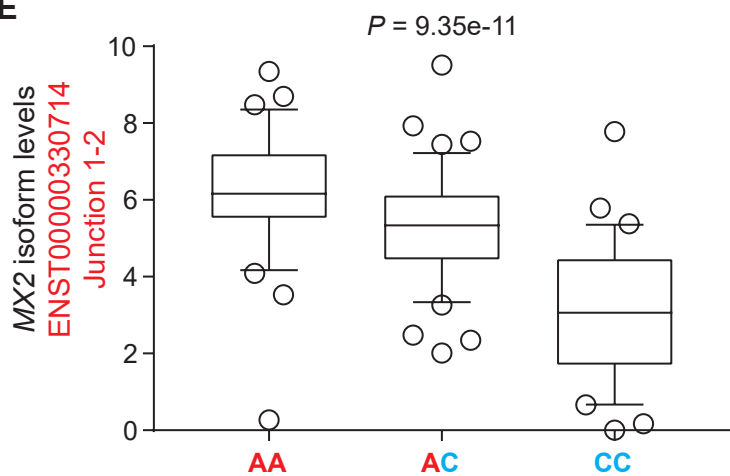

**F**

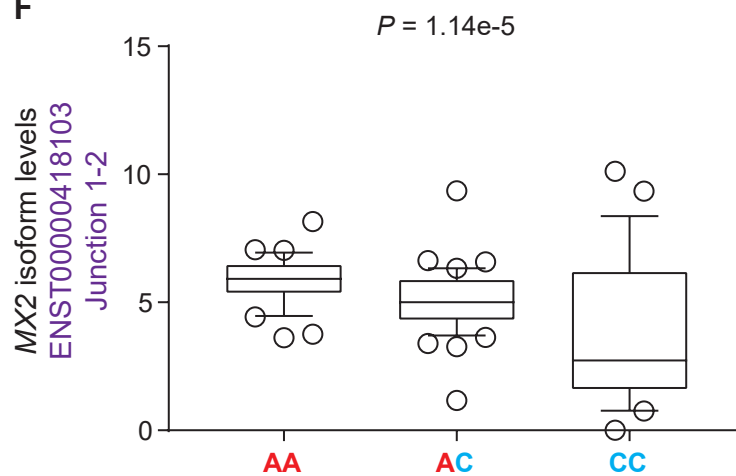

**Supplementary Figure 11** (A) Genomic map of *MX2* transcript isoforms based on Ensembl75 (GRCh37). Half-circle lines denote the isoform-specific splice junctions tested with Taqman probes. Dashed lines indicate the chr21:42742322:42748763 junction identified by melanocyte sQTL analysis. (B) melanocyte sQTL plot of an *MX2* splice junction relative to rs398206 genotypes using LeafCutter<sup>1</sup>. The Y-axis displays standardized and normalized “percent spliced in” ( $\Delta$ PSI) of the junction, Chr21:42742322:42748763, within the cluster 19694 (clu\_19694) of introns sharing splice sites. sQTL nominal *P*-value is shown. The genome-wide significance threshold for cluster 19694 is  $P = 9.12e-6$ . (C-F) qPCR validation of splice-junction specific *MX2* isoform levels in melanocytes relative to rs398206 genotypes using Taqman probes targeting unique junctions of ENST00000330714, junction 3-4 (C), ENST00000543692, junction 3-4 (D), ENST00000330714, junction 1-2 (E), and ENST00000418103, junction 1-2 (F). Linear regression using average dCt values of PCR triplicates normalized over *TBP* levels against rs398206 A allele count. For plotting, dCt values were converted to *MX2* isoform levels by using  $\log_2$  (fold-change over the sample showing the highest dCt).

A

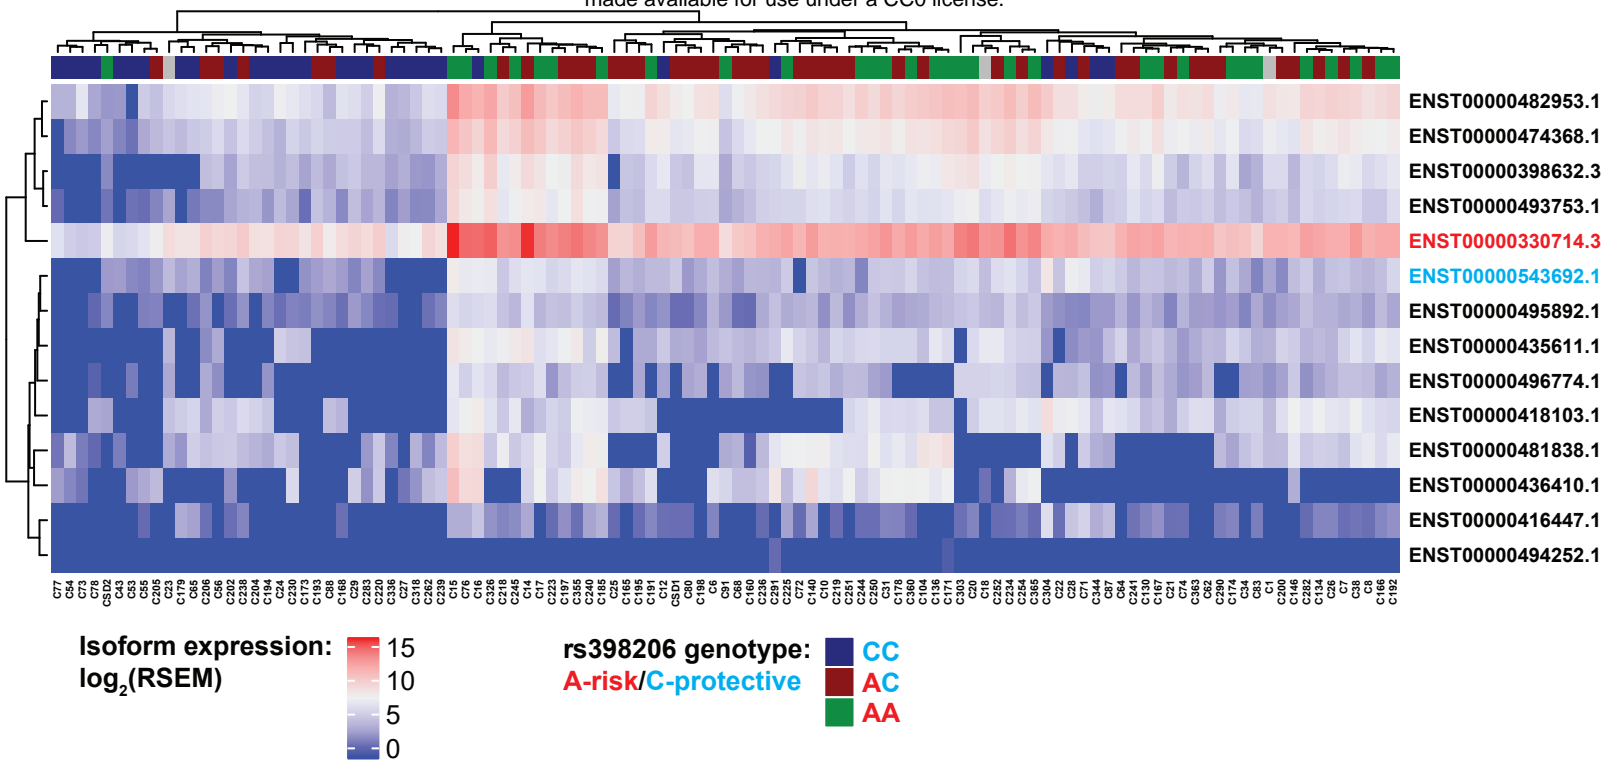

B

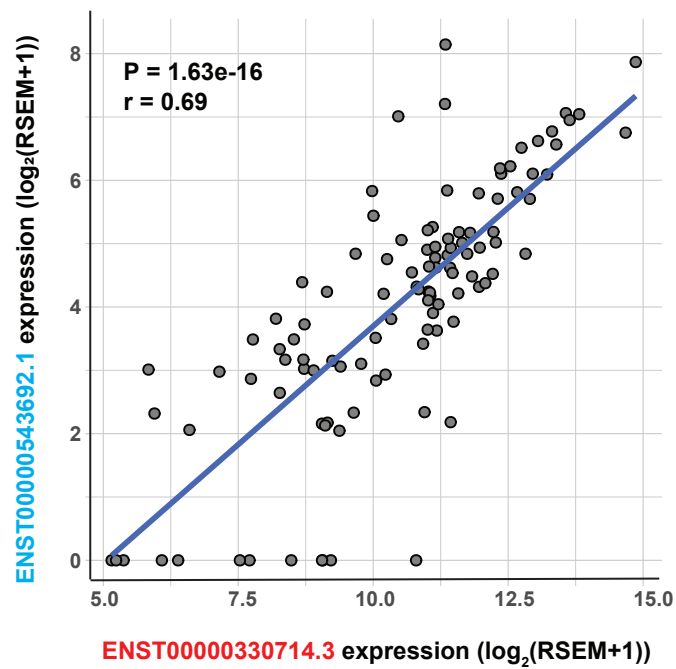

**Supplementary Figure 12** (A) Heatmap of clustered *MX2* transcript isoform expression levels are shown for 106 primary cultures of melanocytes. Isoform quantification from melanocyte RNA-Seq data was performed using RSEM expression quantification package (iterations of Expectation-Maximization algorithms to assign reads to the isoforms from which they originate)<sup>4,5</sup>. rs398206 genotypes are shown (A: risk, C: protective). (B) Expression correlation between isoform ENST00000330714.3 (full-length, most abundant) and ENST00000543692.1 (rs398206 is located at the 5' UTR). Pearson correlation  $r$  and P-value are shown.

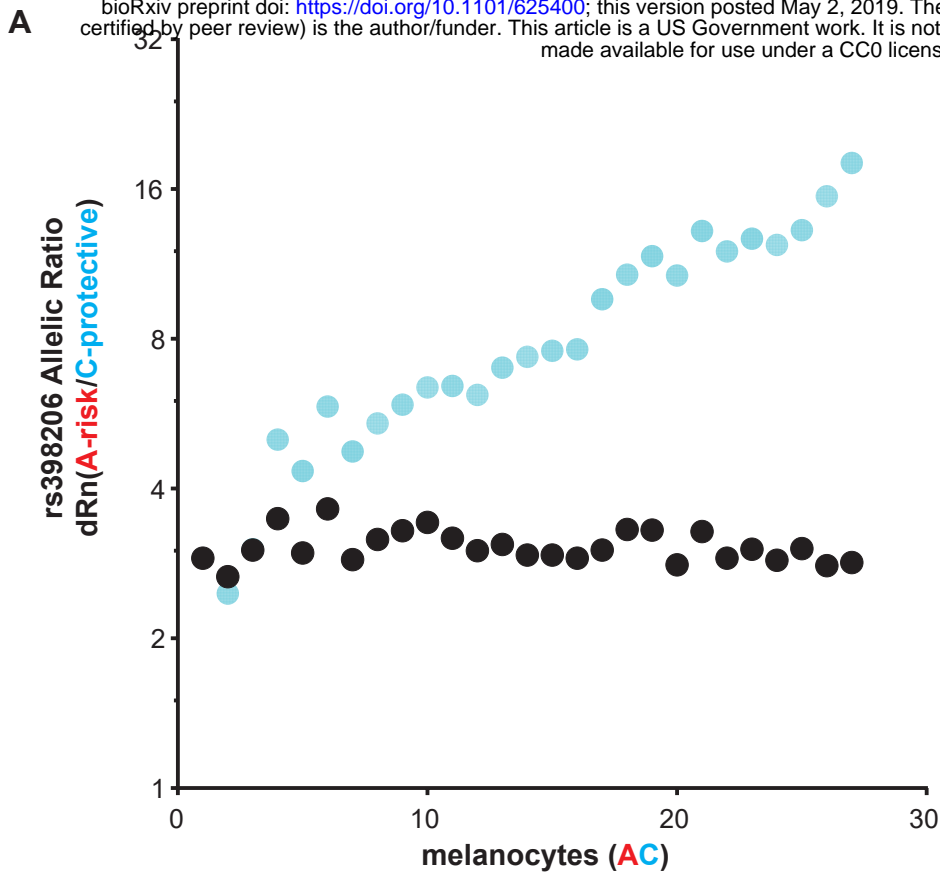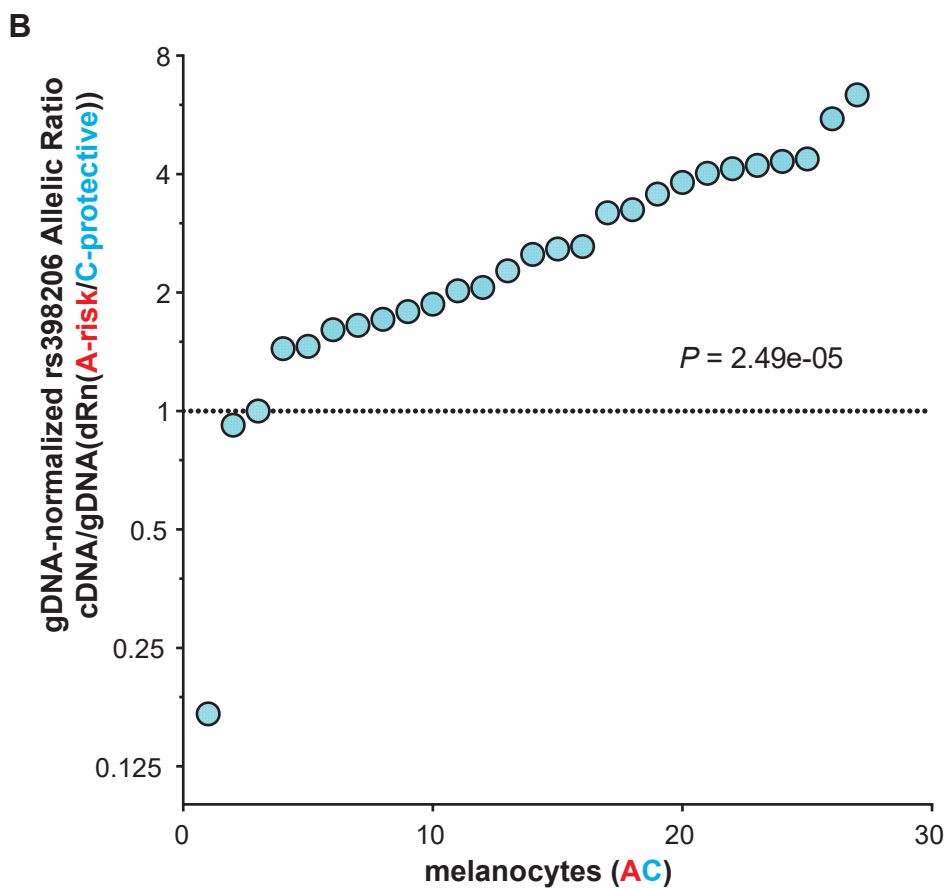

**Supplementary Figure 13** (A) Allele-specific expression of *MX2* transcripts harboring rs398206 in a subset of heterozygous human primary melanocytes. Melanocyte cDNA and genomic DNA (gDNA) from 27 heterozygous individuals were genotyped using a Taqman probe set for rs398206. A/C allelic ratio of dRn values (average of PCR duplicates) are plotted for gDNA and cDNA. (B) cDNA A/C allelic ratio normalized over gDNA A/C ratio from the same sample is plotted for each sample. Dotted line denotes normalized A/C ratio of 1. One-sample Wilcoxon signed rank test was used. Y-axes are displayed in  $\log_2$ -scale.

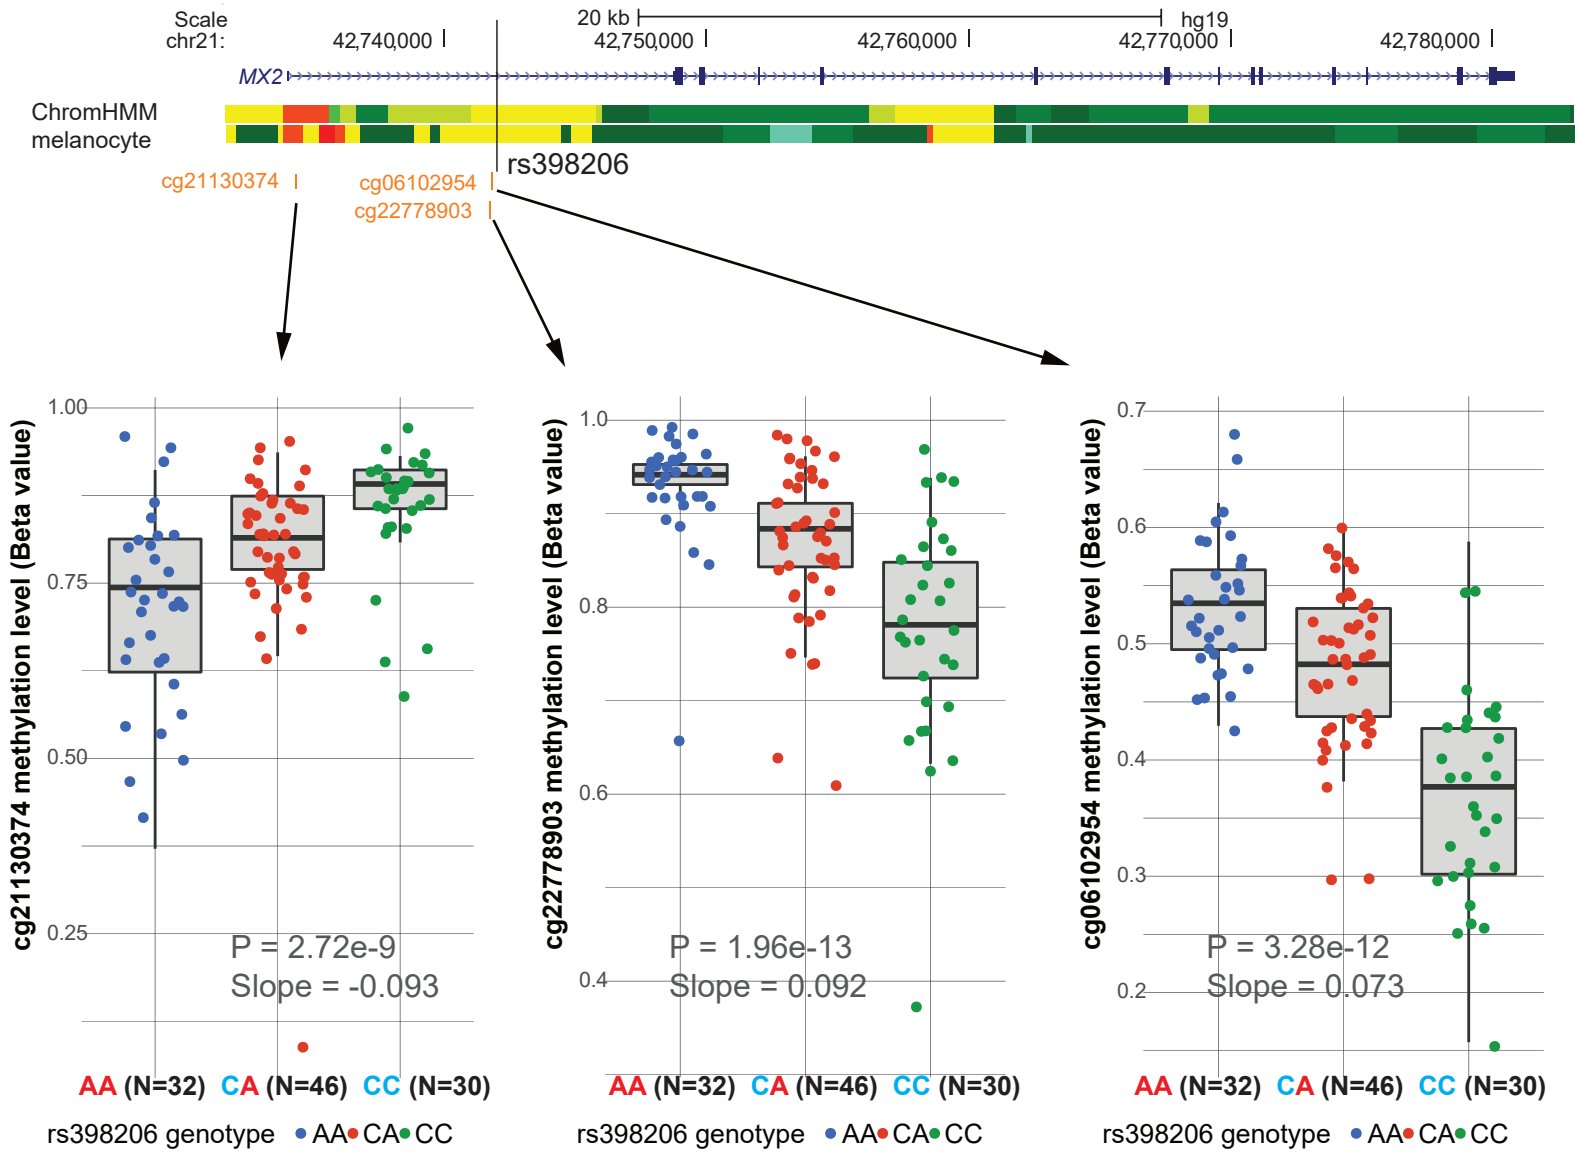

**Supplementary Figure 14** Genomic map of *MX2* gene (RefSeq transcript; hg19) with the positions of three CpG probes from the Illumina Human Methylation 450K platform. ChromHMM tracks of primary melanocytes from two individuals are shown. Box plots of meQTL from primary melanocytes (n = 106) between each CpG probe and rs398206 are shown at the bottom (median and 25<sup>th</sup> and 75<sup>th</sup> percentile). meQTL P-values and slopes (relative to A-allele) are shown on the plot.



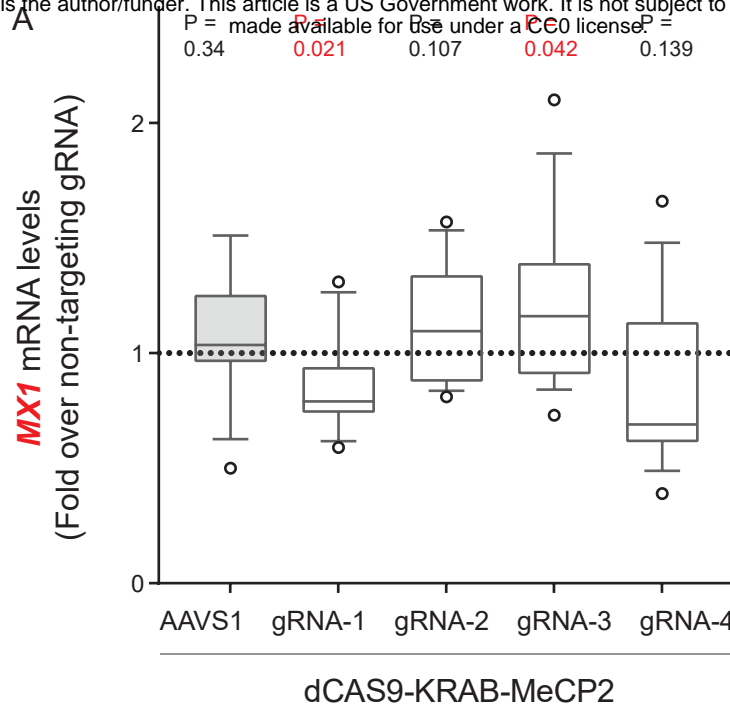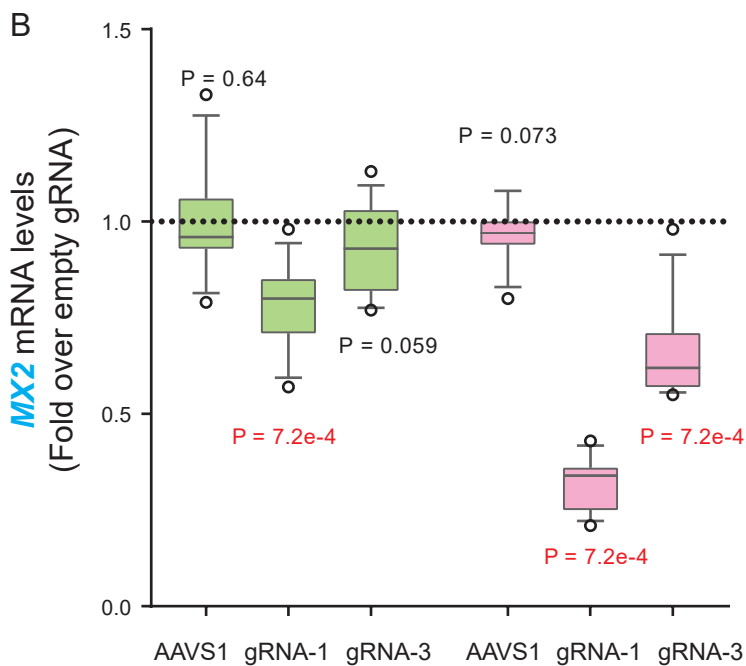

■ dCAS9 ■ dCAS9-KRAB-MeCP2

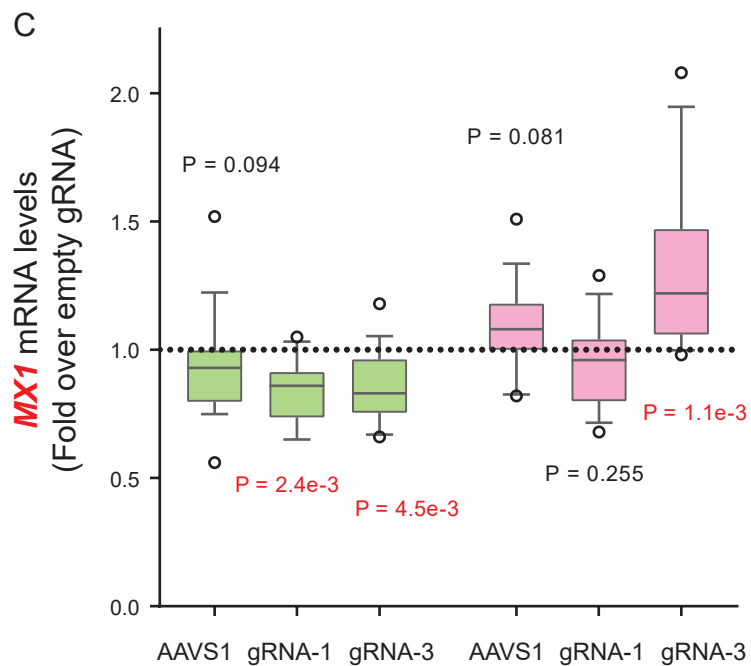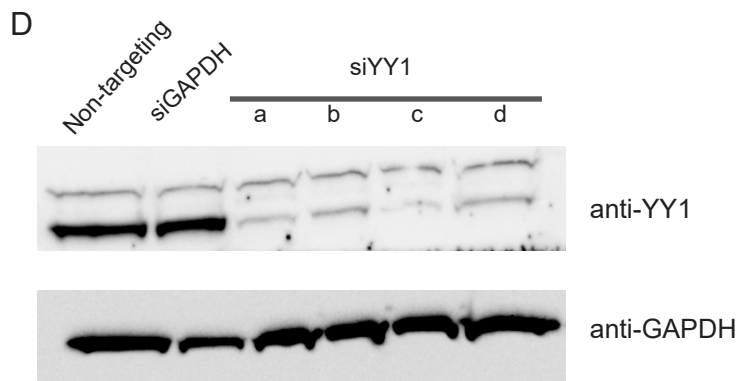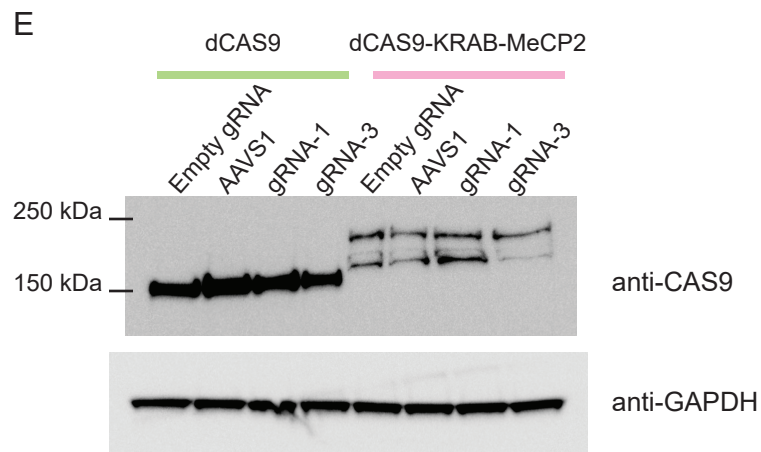

**Supplementary Figure 15** CRISPRi using gRNAs targeting rs398206 in UACC903 cells. (A) CRISPRi using dCAS9-KRAB-MeCP2 and four gRNAs targeting the area immediately surrounding rs398206. Levels of *MX1* transcript (*GAPDH*-normalized) are shown as fold change over those from non-targeting gRNA. Three biological replicates of  $n = 6$  were combined (total  $n=18$ , except gRNA-3,  $n=17$ ). gRNAs 1, 3, and 4 directly overlap rs398206, while gRNA 2 targets ~25bp upstream of rs398206. (B,C) CRISPRi using dCAS9 or dCAS9-KRAB-MeCP2 and gRNAs 1 and 3. Levels of *MX2* (B) or *MX1* (C) transcript (*GAPDH*-normalized) are shown as fold change over those from empty gRNA vector, pRC0215, within each set using the same type of dCAS9 constructs. Three biological replicates of  $n = 5$  were combined (total  $n = 15$ ). AAVS (gRNA targeting adeno virus integration site on Chr19). Box: Median and 25<sup>th</sup> to 75<sup>th</sup> percentile. Whisker: 10<sup>th</sup> to 90<sup>th</sup> percentile. *P* - values are shown from one-sample Wilcoxon test (two-sided) for difference from non-targeting siRNA/gRNA ( $P < 0.05$  are shown in red). Dotted line denotes the *MX2* levels in non-targeting siRNA/gRNA control. (D) Western blotting using anti-YY1 and anti-GAPDH antibodies and cell lysates of UACC903 transfected with four different siRNAs targeting YY1. Proteins were isolated at 72hrs following transfection. Non-targeting: non-targeting siRNA, siGAPDH: positive control siRNA targeting *GAPDH*. (E) Western blotting was performed using anti-CAS9 (recognizing both ~160 kDa dCAS9 and ~200 kDa dCAS9-KRAB-MeCP2) and anti-GAPDH antibodies, and cell lysates of UACC903 co-transfected with dCAS9 or dCAS9-KRAB-MeCP2 and indicated gRNAs. Relative positions of protein ladders are shown on the left side for the anti-CAS9 blot. Proteins were collected from one representative set of three sets of total transfections.

### HCT116 cells YY1 Hi-ChIP (5kb binning)

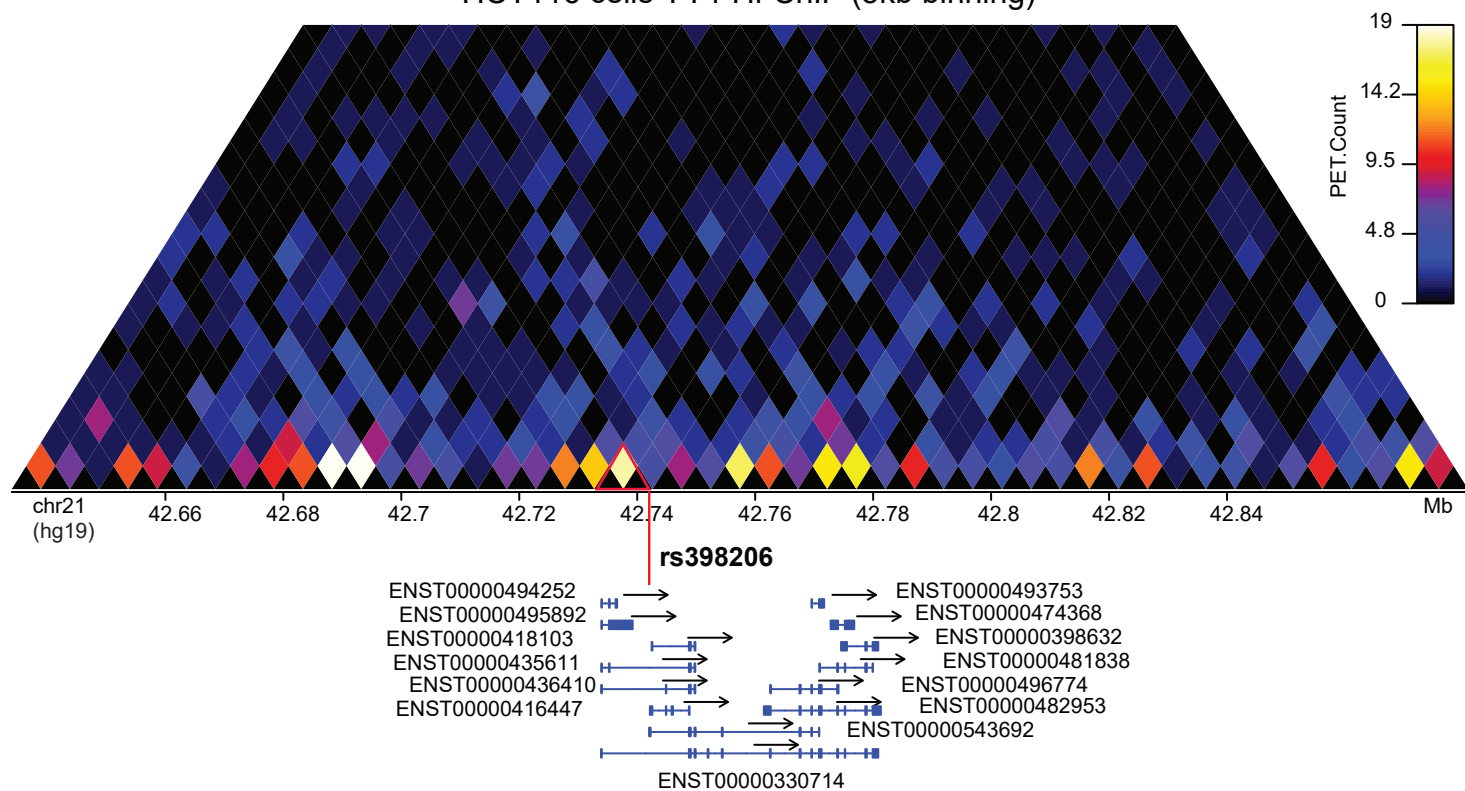

**Supplementary Figure 16** YY1-mediated chromatin interaction map of the genomic region encompassing *MX2* was plotted using YY1 Hi-ChIP data in HCT116 cell line reported by Weintraub and colleagues<sup>6</sup>. Black triangles at the bottom row of the heatmap represent 5kb bins for measuring physical interactions. Each diamond of the heatmap displays the paired-end tag counts (PET.Count) between two bins connected by the diamond. The genomic position of rs398206 is shown with red vertical line, and red triangle highlights the interaction between the bin harboring rs398206 and the neighboring bin encompassing the *MX2* promoter region.

A

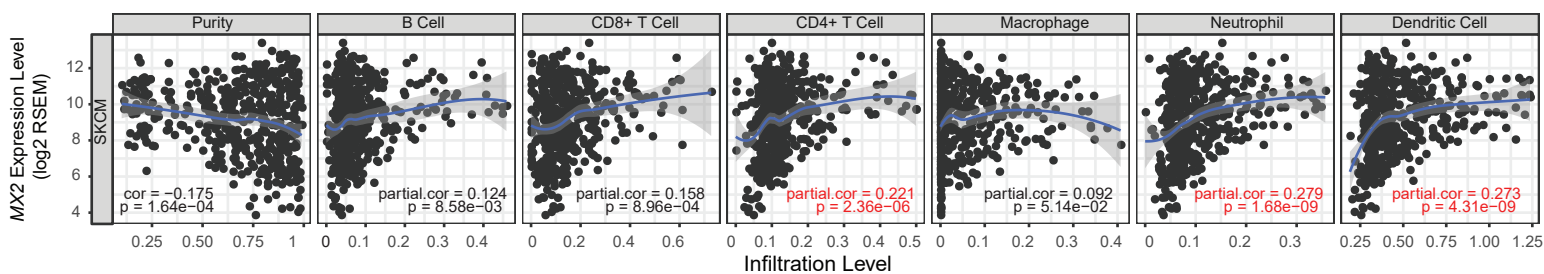

B

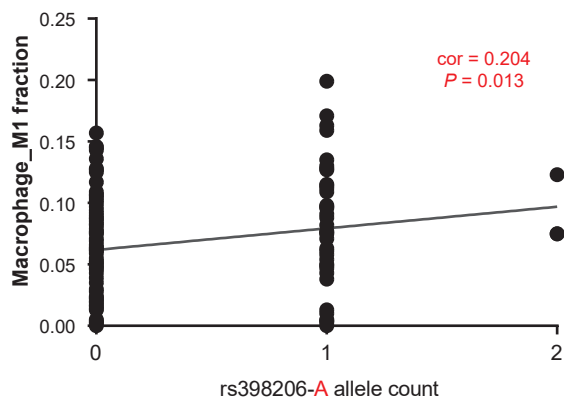

C

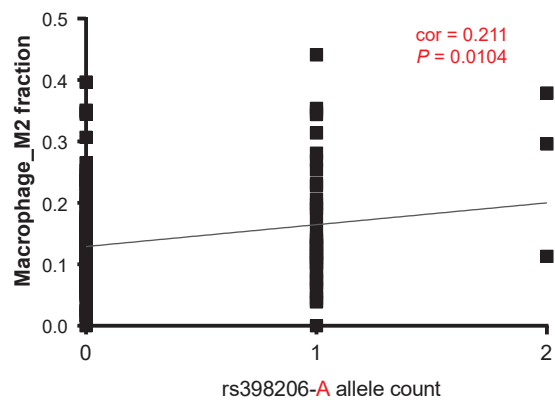

**Supplementary Figure 17** (A) Correlation of *MX2* levels in TCGA SKCM samples with tumor purity and six types of immune cell infiltration levels using TIMER<sup>2</sup> program. Purity is defined as % malignant cells in a tumor tissue inferred from CNA data. Purity-corrected partial Spearman's correlation and statistical significance are shown. Correlation values with partial correlation coefficient > |0.2| and  $P < 0.05$  are shown in red. (B) CIBERSORT<sup>3</sup> analyses of TCGA SKCM samples. Pearson correlation coefficients are shown between rs398206 genotype (A allele count) and estimated fractions of Macrophage M1 (B) and M2 (C) using 147 samples displaying significant deconvolution ( $P < 0.05$ ). Only these two cell types among 22 types of leukocytes showed correlation coefficient > |0.2| and  $P < 0.05$ .

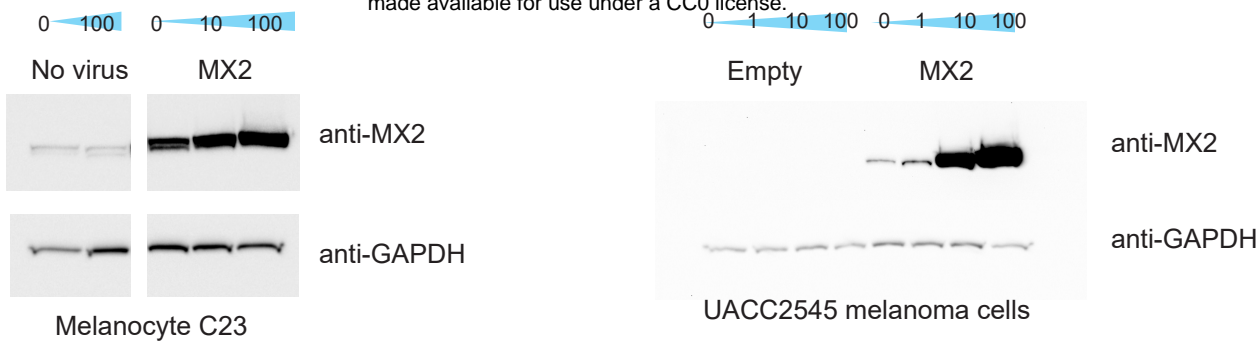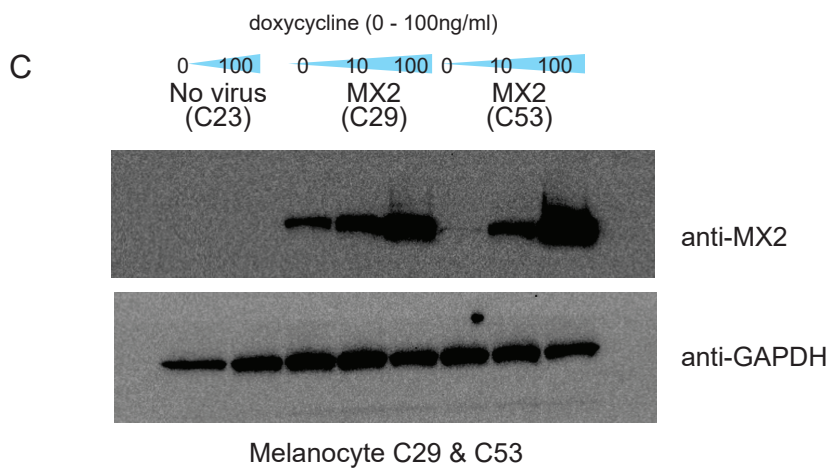

**Supplementary Figure 18.** (A-B) Western blotting using anti-MX2 and anti-GAPDH antibodies and cell lysates from primary human melanocytes (A) or UACC2545 melanoma cells (B) infected with lentivirus containing *MX2* cDNA, empty pINDUCER20, or no virus with a varying amount of doxycycline treatment. Cells were infected concomitantly with each round of xCELLigence growth assay and harvested at 72hrs of doxycycline treatment. One representative set from each cell type are shown from three biological replicates. (C) Western blotting using anti-MX2 and anti-GAPDH antibodies and cell lysates from two additional melanocytes cultures from different individuals infected with lentivirus containing *MX2* cDNA with a varying amount of doxycycline treatment. Cells were infected concomitantly with one representative round of RNAseq experiment out of three biological replicates and harvested at 72hrs of doxycycline treatment.
